# Supplementary material for: Enzymatic reduction of halogenated aryl ketones in an aqueous micellar solution with enhanced catalytic performance
Source: Royal Society of Chemistry journal article supplement (doi:10.1039/d4gc00773e), 2024-01-01

## Supporting Information

### **Enzymatic Reduction of Halogenated Aryl Ketones in Aqueous Micellar Solution with Enhanced Catalytic Performance**

Yunting Liu<sup>†,‡</sup>, Jiajing Yan<sup>†</sup>, Quan Yuan<sup>†</sup>, Li Ma<sup>†</sup>, Liya Zhou<sup>†</sup>, Ying He<sup>†</sup>, Guanhua Liu<sup>†</sup>, Xiaoyang  
Yue<sup>\*,†</sup> and Yanjun Jiang<sup>\*,†,‡</sup>

<sup>†</sup>School of Chemical Engineering and Technology, Hebei University of Technology, Tianjin  
300401, China

<sup>‡</sup>National-Local Joint Engineering Laboratory for Energy Conservation in Chemical Process  
Integration and Re-sources Utilization, Hebei University of Technology, Tianjin 300401, China

\*E-mail: xiaoyang.yue@hebut.edu.cn; yanjunjiang@hebut.edu.cn

## Contents

|                                                                                                                                                                                                                                              |    |
|----------------------------------------------------------------------------------------------------------------------------------------------------------------------------------------------------------------------------------------------|----|
| Chemicals and materials.....                                                                                                                                                                                                                 | 3  |
| Preparation of DL- $\alpha$ -Tocopherol Succinate .....                                                                                                                                                                                      | 3  |
| Preparation of TPGS-750-M.....                                                                                                                                                                                                               | 3  |
| Preparation of substrate solubilization .....                                                                                                                                                                                                | 4  |
| <b>Table S1.</b> The productive reaction of 9a with or without micelles.....                                                                                                                                                                 | 5  |
| <b>Table S2.</b> Effect of various surfactants on the enzyme activity of LfSDR1.....                                                                                                                                                         | 6  |
| <b>Table S3.</b> Effect of various surfactants on the enzyme activity of GDH.....                                                                                                                                                            | 7  |
| <b>Table S4.</b> The relative activity of LfSDR1 and GDH treated by TPGS-750-M.....                                                                                                                                                          | 8  |
| <b>Table S5.</b> Molecular van der Waals volumes based on the Marching Tetrahedron algorithm calculation.....                                                                                                                                | 9  |
| <b>Table S6.</b> Solubilization in pure buffer and 2 wt% TPGS-750-M solution.....                                                                                                                                                            | 11 |
| <b>Fig S1.</b> DLS spectra of the micellar solution involving (a) LfSDR1 and (b) GDH.....                                                                                                                                                    | 12 |
| <b>Fig S2.</b> CD spectra of (a) LfSDR1 and (b) GDH with or without TPGS-750-M and (c-d) the corresponding domains distribution.....                                                                                                         | 13 |
| <b>Fig S3.</b> Solubilization of (a) 1a; (d) 20a; (g) 24a in TPGS-750-M; Solubilization calibration curve of (b) 1a; (e) 20a; (h) 24a in TPGS-750-M; MAC of (c) 1a; (f) 20a; (i) 24a in TPGS-750-M solution with various concentrations..... | 14 |
| <sup>1</sup> H and <sup>13</sup> C NMR spectra of TPGS-750-M in CDCl <sub>3</sub> .....                                                                                                                                                      | 15 |
| NMR spectra of TPGS-750-M.....                                                                                                                                                                                                               | 16 |
| <sup>1</sup> H and <sup>13</sup> C NMR spectra of the products recorded in CDCl <sub>3</sub> .....                                                                                                                                           | 18 |
| NMR spectra of compounds.....                                                                                                                                                                                                                | 27 |
| GC traces for productions .....                                                                                                                                                                                                              | 52 |

## **Chemicals and materials**

All chemicals and reagents were purchased from J & K, Acros, Aldrich, and Aladdin, and chemicals were obtained from authentic suppliers of at least of reagent grade and used without further purification. Nicotinamide adenine dinucleotide (NADH) was purchased from Aladdin (Shanghai, China).

## **Preparation of DL- $\alpha$ -Tocopherol Succinate**

Vitamin E (4.3 g) and succinic anhydride (1.5 g) were dissolved in toluene (20 mL), followed by the addition of triethylamine (0.35 mL), and the reaction was carried out at 60 °C for 5 h. Water was added to the reacted mixture, and extraction was carried out using dichloromethane. The organic layer after the extraction was cleaned using hydrochloric acid (1 M, 50 mL) and water (30 mL) for 3-4 times, dried with anhydrous sodium sulfate, and concentrated in vacuum to obtain a yellow liquid. The yellow liquid was purified using column chromatography with 10% ethyl acetate/hexane and 35% ethyl acetate/hexane to obtain DL- $\alpha$ -vitamin E succinate and a white solid.

## **Preparation of TPGS-750-M**

DL- $\alpha$ -Vitamin E Succinate (2.97 g), Polyethylene Glycol Monomethyl Ether-750 (4.00 g), p-Toluene Sulfonic Acid (0.15 g), and Toluene (20 mL) were added to a 50 mL single-necked flask and refluxed for 5 h at 130 °C using a Dean-Stark refluxer. The mixture was cooled to room temperature, then saturated aqueous phase was added and extracted with dichloromethane using sodium bicarbonate solution. The extracted organic layer was washed 3-4 times with saturated sodium bicarbonate (50 mL) and brine (30 mL), dried with anhydrous sodium sulfate and concentrated in vacuum to

obtain a yellow liquid.

### **Preparation of substrate solubilization**

Surfactant, excess substrate and appropriate amount of water were added to the centrifuge tube and shaken in a water bath shaker for 24 h. Undissolved substrates were removed with a filter membrane, and the substrate dissolved in water was diluted 10-100 times with ethanol, and the solubility of the substrate dissolved in water was determined by UV-visible spectrometry (double-beam mode, wavelengths of 200-600 nm, and a scanning speed of 600 nm/min). A calibration curve was established by determining the solubility of different concentrations of the substrate in ethanol.

**Table S1 The productive reaction of 9a with or without micelles.**

| Substrate concentration | Conversion <sup>a</sup>  |                                         |
|-------------------------|--------------------------|-----------------------------------------|
|                         | buffer only <sup>b</sup> | 6 wt% TPGS-750-M in buffer <sup>c</sup> |
| 0.5 M                   | 58%                      | 70%                                     |

<sup>a</sup> Reaction conditions: 2 mL PBS buffer (1 M, pH = 7), LfSDR1 (4.5 U), GDH (9 U), NADH (2 mM), n(substrate)/n(glucose) = 5/6, 30 °C, 24 h.

<sup>b</sup> Reaction conditions: 2 mL PBS buffer (1 M, pH = 7), LfSDR1 (4.5 U), GDH (9 U), NADH (2 mM), TPGS-750-M (6 wt%) n(substrate)/n(glucose) = 5/6, 30 °C, 24 h.

<sup>c</sup> The conversion and ee value were determined by GC.

**Table S2.** Effect of various surfactants on the enzyme activity of LfSDR1

| Time<br>(h) | Enzyme activity of LfSDR1 (U/mg) |                |              |                  |          |             |                  |           |
|-------------|----------------------------------|----------------|--------------|------------------|----------|-------------|------------------|-----------|
|             | PBS                              | TPGS-750-<br>M | Tween-<br>60 | Solutol<br>HS-15 | Tween-40 | Brij-<br>30 | Triton X-<br>100 | Trilaurin |
| 0           | 0.456                            | 0.453          | 0.371        | 0.384            | 0.421    | 0.430       | 0.449            | 0.446     |
| 4           | 0.437                            | 0.430          | 0.336        | 0.382            | 0.420    | 0.396       | 0.396            | 0.411     |
| 8           | 0.418                            | 0.385          | 0.324        | 0.377            | 0.381    | 0.372       | 0.376            | 0.385     |
| 12          | 0.369                            | 0.366          | 0.323        | 0.343            | 0.362    | 0.351       | 0.334            | 0.208     |
| 24          | 0.361                            | 0.356          | 0.312        | 0.304            | 0.348    | 0.327       | 0.208            | 0.182     |

**Table S3.** Effect of various surfactants on the enzyme activity of GDH

| Time<br>(h) | Enzyme activity of GDH (U/mg) |                |          |                   |          |         |                  |           |
|-------------|-------------------------------|----------------|----------|-------------------|----------|---------|------------------|-----------|
|             | PBS                           | TPGS-750-<br>M | Tween-60 | Solutol HS-<br>15 | Tween-40 | Brij-30 | Triton X-<br>100 | Trilaurin |
| 0           | 4.86                          | 4.55           | 3.54     | 3.49              | 3.92     | 3.66    | 3.50             | 3.94      |
| 4           | 4.10                          | 3.85           | 3.31     | 3.36              | 3.56     | 2.42    | 3.23             | 3.65      |
| 8           | 3.95                          | 3.78           | 2.98     | 3.27              | 3.46     | 2.22    | 3.22             | 3.37      |
| 12          | 3.72                          | 3.49           | 2.77     | 3.15              | 3.17     | 2.12    | 2.50             | 3.24      |
| 24          | 2.68                          | 3.39           | 2.27     | 3.07              | 2.62     | 1.89    | 2.33             | 2.49      |

**Table S4.** The relative activity of LfSDR1 and GDH treated by TPGS-750-M.

| <b>Time<br/>(h)</b> | <b>LfSDR1 enzyme activity (U/mg)</b> |                        | <b>GDH enzyme activity (U/mg)</b> |                        |
|---------------------|--------------------------------------|------------------------|-----------------------------------|------------------------|
|                     | <b>Pure PBS</b>                      | <b>With TPGS-750-M</b> | <b>Pure PBS</b>                   | <b>With TPGS-750-M</b> |
| 0                   | 0.456                                | 0.453                  | 4.86                              | 4.55                   |
| 4                   | 0.437                                | 0.430                  | 4.10                              | 3.85                   |
| 8                   | 0.418                                | 0.385                  | 3.95                              | 3.78                   |
| 12                  | 0.369                                | 0.366                  | 3.72                              | 3.49                   |
| 24                  | 0.361                                | 0.356                  | 2.68                              | 3.39                   |



**Table S5.** Molecular van der Waals volumes based on the Marching Tetrahedron algorithm calculation

| Name                                          | Molecular volume                                                                                             |
|-----------------------------------------------|--------------------------------------------------------------------------------------------------------------|
| 2-Fluoroacetophenone ( <b>1a</b> )            | 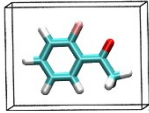 V=292.90 Å <sup>3</sup>   |
| 4-Fluoroacetophenone ( <b>2a</b> )            |  V=287.64 Å <sup>3</sup>   |
| 3-Fluoroacetophenone ( <b>3a</b> )            |  V=291.56 Å <sup>3</sup>   |
| 2',4'-Difluoroacetophenone ( <b>4a</b> )      |  V=446.71 Å <sup>3</sup>   |
| 3',4'-Difluoroacetophenone ( <b>5a</b> )      |  V=290.89 Å <sup>3</sup>  |
| 2'-Chloroacetophenone ( <b>6a</b> )           |  V=391.24 Å <sup>3</sup> |
| 3-Chloropropiophenone ( <b>7a</b> )           |  V=515.62 Å <sup>3</sup> |
| 4'-Chloroacetophenone ( <b>8a</b> )           |  V=305.91 Å <sup>3</sup> |
| 2-Chloroacetophenone ( <b>9a</b> )            |  V=378.75 Å <sup>3</sup> |
| 2-Chloro-4'-fluoroacetophenone ( <b>10a</b> ) |  V=395.67 Å <sup>3</sup> |
| 4'-Bromoacetophenone ( <b>11a</b> )           |  V=313.06 Å <sup>3</sup> |
| 2'-Bromo-4'-Fluoroacetophenone ( <b>12a</b> ) |  V=373.67 Å <sup>3</sup> |

| Name                                                        | Molecular volume                                                                     |                         |
|-------------------------------------------------------------|--------------------------------------------------------------------------------------|-------------------------|
| 2-Chloro-2',4'-difluoroacetophenone ( <b>13a</b> )          | 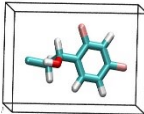   | V=497.57 Å <sup>3</sup> |
| 3'-Chloroacetophenone ( <b>14a</b> )                        |    | V=336.88 Å <sup>3</sup> |
| 2'-Bromoacetophenone ( <b>15a</b> )                         |    | V=442.27 Å <sup>3</sup> |
| 2-Chloro-1-(3,4-difluoro-phenyl)-ethanone<br>( <b>16a</b> ) |    | V=481.14 Å <sup>3</sup> |
| 4'-(Trifluoromethyl)acetophenone ( <b>17a</b> )             |    | V=480.15 Å <sup>3</sup> |
| 3'-Bromoacetophenone ( <b>18a</b> )                         |   | V=357.69 Å <sup>3</sup> |
| 2,4'-Dichloroacetophenone ( <b>19a</b> )                    |  | V=417.88 Å <sup>3</sup> |
| 3'-Bromopropiophenone ( <b>20a</b> )                        |  | V=396.86 Å <sup>3</sup> |
| 3',4'-Dichloroacetophenone ( <b>21a</b> )                   |  | V=500.68 Å <sup>3</sup> |
| 1-(4-bromophenyl)-2-chloroethan-1-one<br>( <b>22a</b> )     |  | V=425.47 Å <sup>3</sup> |
| 2,2',4'-Trichloroacetophenone ( <b>23a</b> )                |  | V=513.15 Å <sup>3</sup> |
| 2,3',4'-Trichloroacetophenone ( <b>24a</b> )                |  | V=545.76 Å <sup>3</sup> |
| 3',5'-Bis(trifluoromethyl)acetophenone ( <b>25a</b> )       |  | V=586.62 Å <sup>3</sup> |

**Table S6.** Solubilization in pure buffer and 2 wt% TPGS-750-M solution

| <b>Substrate</b> | <b>Solubilization (ppm)</b> |                         | <b>Relative Increase</b> |
|------------------|-----------------------------|-------------------------|--------------------------|
|                  | <b>Buffer only</b>          | <b>2 wt% TPGS-750-M</b> |                          |
| <b>1a</b>        | 6300                        | 7755                    | 1455                     |
| <b>20a</b>       | 2600                        | 6000                    | 3400                     |
| <b>24a</b>       | 1410                        | 12320                   | 10890                    |

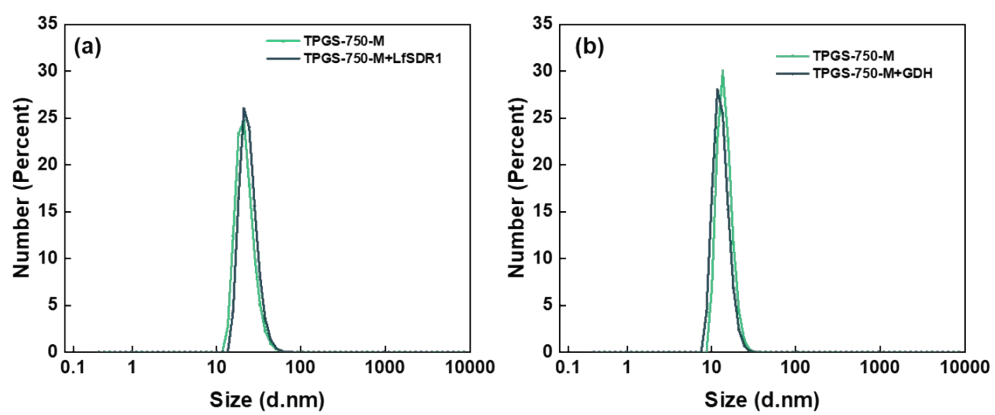

**Fig S1.** DLS spectra of the micellar solution involving (a) LfSDR1 and (b) GDH.

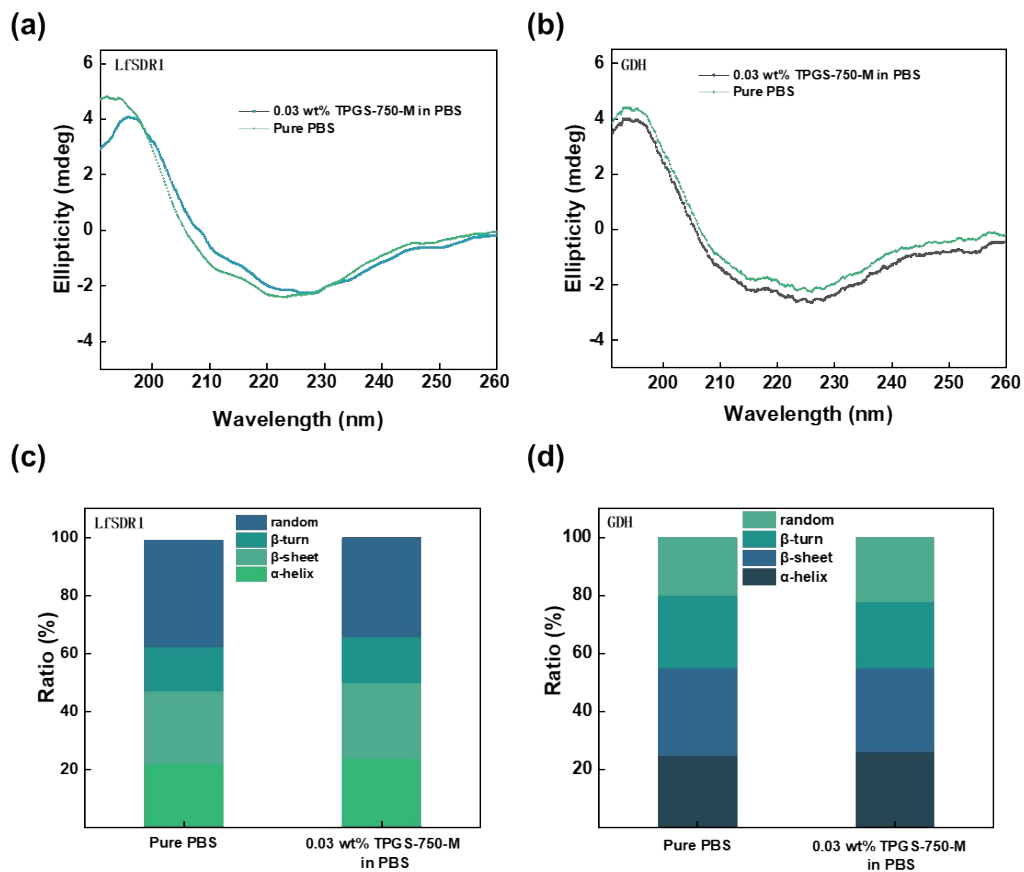

**Fig S2.** CD spectra of (a) LfSDR1 and (b) GDH with or without TPGS-750-M and (c-d) the corresponding domains distribution.

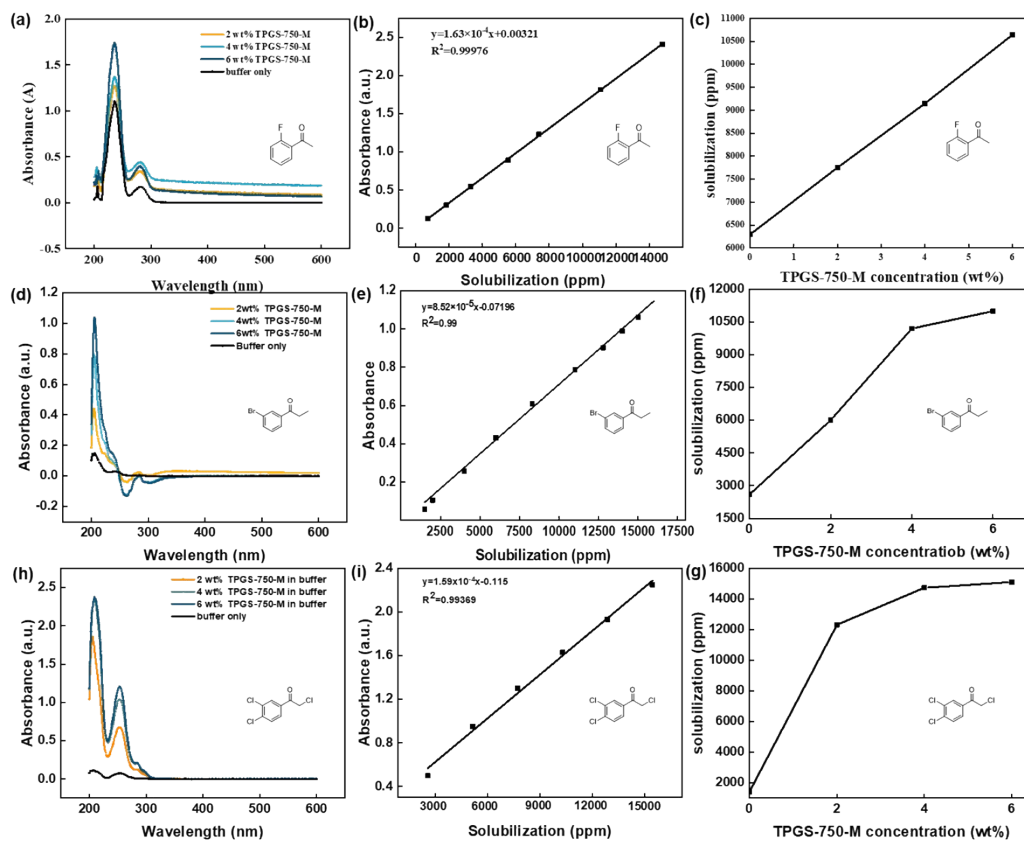

**Fig S3.** Solubilization of (a) **1a**; (d) **20a**; (g) **24a** in TPGS-750-M; Solubilization calibration curve of (b) **1a**; (e) **20a**; (h) **24a** in TPGS-750-M; MAC of (c) **1a**; (f) **20a**; (i) **24a** in TPGS-750-M solution with various concentrations.

## **<sup>1</sup>H and <sup>13</sup>C NMR spectra of TPGS-750-M in CDCl<sub>3</sub>**

### **DL- $\alpha$ -Tocopherol Succinate**

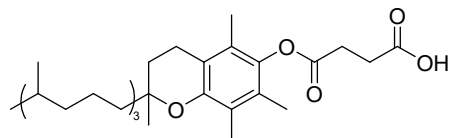

**<sup>1</sup>H NMR** (400 MHz, Chloroform-*d*)  $\delta$  2.01 (s, 3H), 1.89 – 1.75 (m, 2H), 1.76 (s, 1H), 1.62 – 1.51 (m, 3H), 2.98 (t, 2H), 2.87 (t, 2H), 2.62 (t, 2H), 2.13 (s, 3H), 2.06 (s, 3H), 1.27 (s, 21H), 0.92 – 0.87 (m, 12H). **<sup>13</sup>C NMR** (101 MHz, Chloroform-*d*)  $\delta$  176.78, 171.18, 149.52, 140.46, 127.79, 124.99, 123.13, 117.47, 75.13, 39.44, 37.52, 37.6, 37.5, 37.4, 33, 32.86, 31.4, 29.78, 28.81, 28.06, 24.89, 24.53, 24.1, 22.80, 22.71, 21.12, 20.67, 19.83, 19.76, 12.98, 12.12, 11.90.

### **TPGS-750-M**

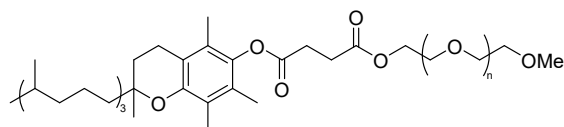

**<sup>1</sup>H NMR** (400 MHz, Chloroform-*d*)  $\delta$  4.35 – 4.27 (m, 2H), 3.77 – 3.55 (m, 66H), 3.43 (s, 3H), 2.97 (t, 2H), 2.84 (t, 2H), 2.62 (t, 2H), 2.12 (s, 3H), 2.06 (s, 3H), 2.02 (s, 3H), 1.89 – 1.74 (m, 2H), 1.54 – 1.10 (m, 24H), 0.93 – 0.87 (m, 12H). **<sup>13</sup>C NMR** (101 MHz, Chloroform-*d*)  $\delta$  172.73, 171.02, 149.49, 140.51, 126.82, 125.01, 123.06, 117.44, 94.13, 75.12, 72.01, 70.65, 69.14, 64.01, 59.13, 39.44, 37.48, 37.32, 37.28, 32.85, 32.71, 31.05, 29.77, 28.90, 28.05, 24.88, 24.52, 22.80, 22.71, 21.11, 20.66, 19.82, 19.76, 13.01, 12.17, 11.89.

# NMR spectra of TPGS-750-M

## DL- $\alpha$ -Tocopherol Succinate

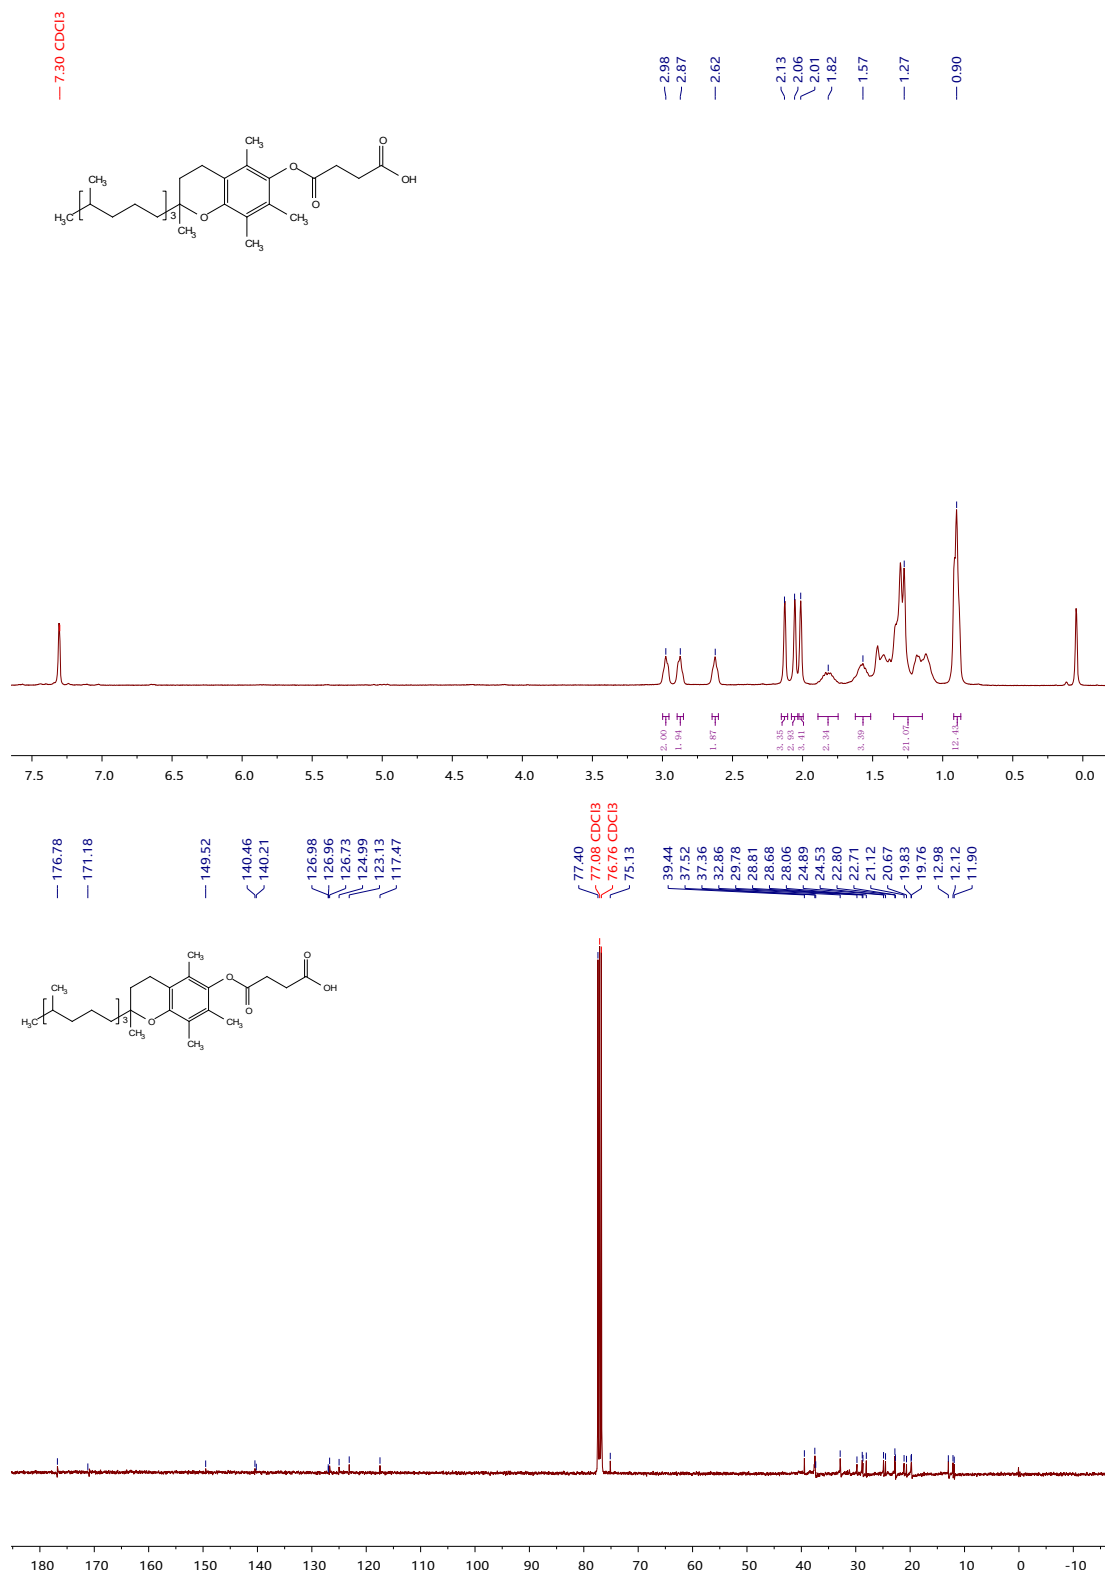



# TPGS-750-M

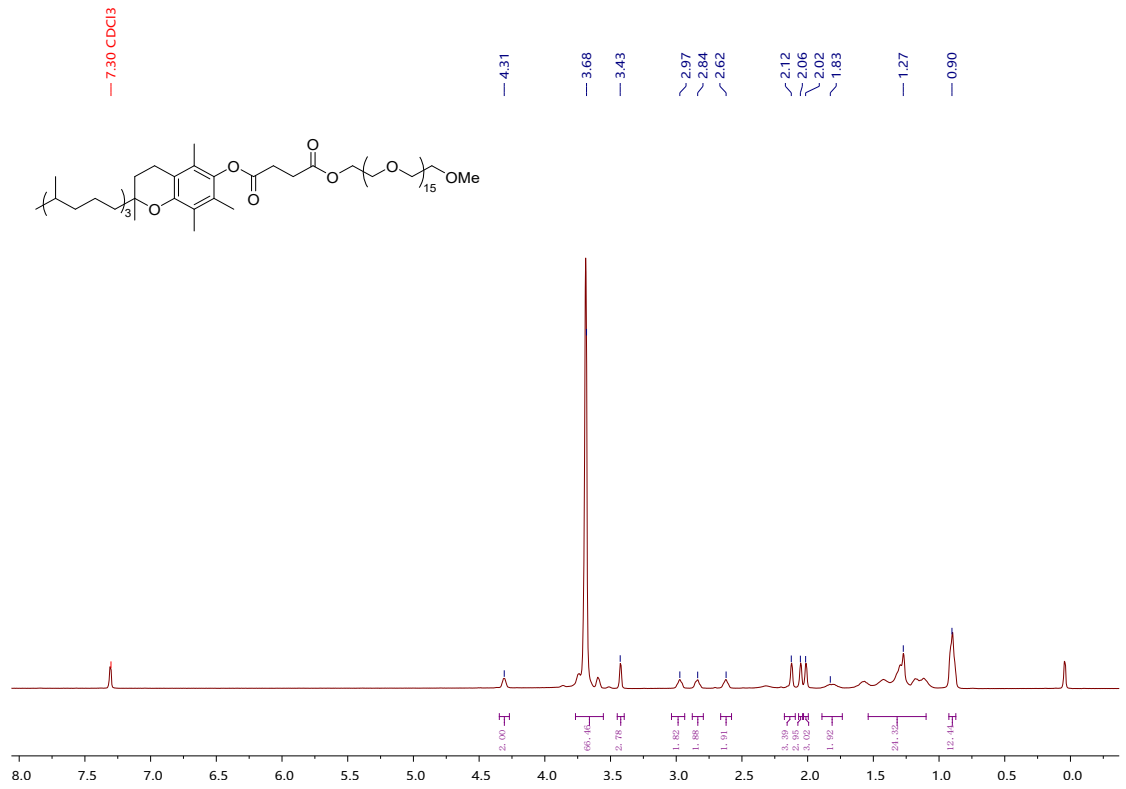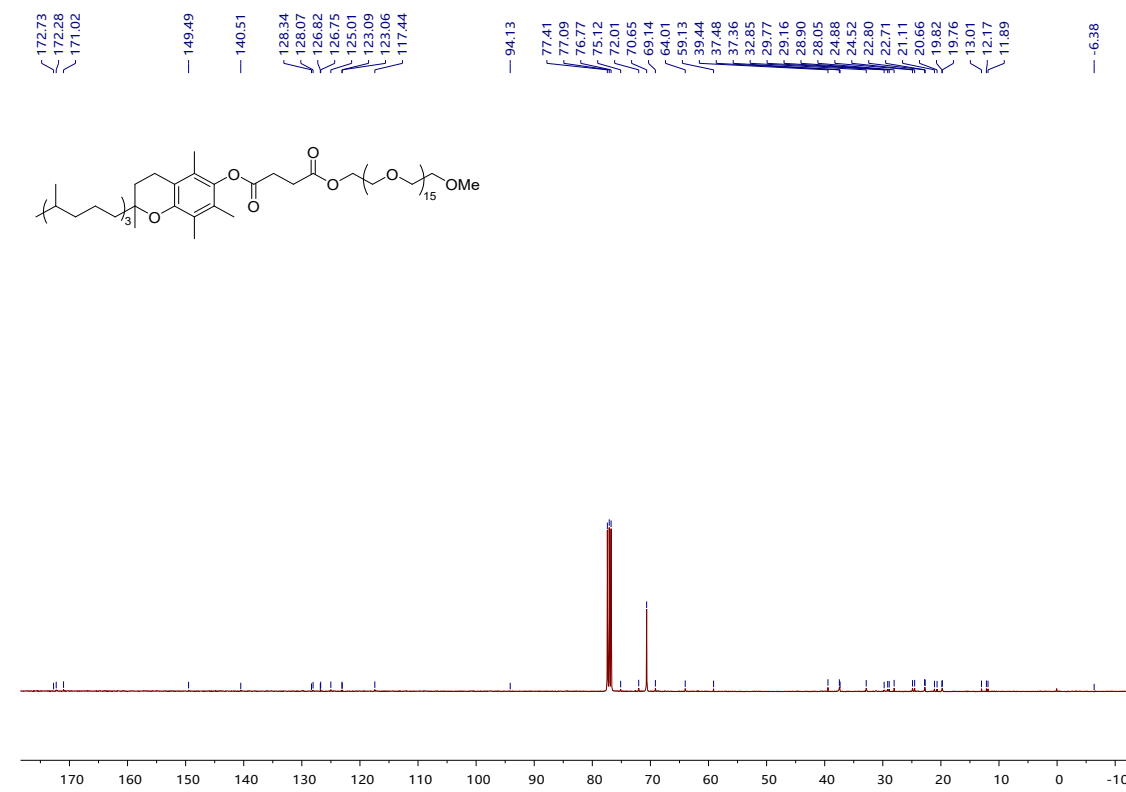

## **<sup>1</sup>H and <sup>13</sup>C NMR spectra of the products recorded in CDCl<sub>3</sub>**

### **(S)-1-(2-fluorophenyl)ethan-1-ol **1b****

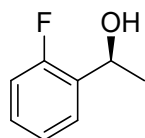

**<sup>1</sup>H NMR** (400 MHz, Chloroform-*d*)  $\delta$  7.52 (s, 1H), 7.28 (d,  $J = 7.3$  Hz, 1H), 7.18 (t,  $J = 7.6$  Hz, 1H), 7.05 (t,  $J = 9.6$  Hz, 1H), 5.23 (d,  $J = 5.9$  Hz, 1H), 2.00 (d,  $J = 4.0$  Hz, 1H), 1.55 (d,  $J = 6.2$  Hz, 3H). **<sup>13</sup>C NMR** (101 MHz, Chloroform-*d*)  $\delta$  161.01, 158.57, 132.77, 132.63, 128.87, 128.79, 126.71, 126.66, 124.39, 124.36, 115.46, 115.24, 64.62, 64.58, 24.06.

### **(S)-1-(4-fluorophenyl)ethan-1-ol **2b****

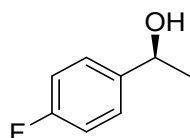

**<sup>1</sup>H NMR** (400 MHz, Chloroform-*d*)  $\delta$  7.38 (s, 2H), 7.07 (s, 2H), 4.92 (d,  $J = 6.0$  Hz, 1H), 1.97 (s, 1H), 1.52 (s, 3H). **<sup>13</sup>C NMR** (101 MHz, Chloroform-*d*)  $\delta$  163.39, 160.95, 141.60, 141.56, 127.15, 127.07, 115.42, 115.21, 69.82, 25.34.

### **(S)-1-(3-fluorophenyl)ethan-1-ol **3b****

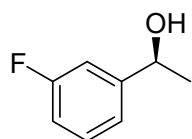

**<sup>1</sup>H NMR** (400 MHz, Chloroform-*d*)  $\delta$  7.34 (d,  $J = 5.7$  Hz, 1H), 7.17 (s, 1H), 7.12 (s, 1H), 6.99 (s, 1H), 4.93 (d,  $J = 5.8$  Hz, 1H), 1.97 (s, 1H), 1.53 (s, 3H). **<sup>13</sup>C NMR** (101 MHz, Chloroform-*d*)  $\delta$  164.43, 161.98, 148.75, 148.68, 130.24, 130.16, 121.15, 121.12, 114.53, 114.32, 112.62, 112.40, 70.00, 25.42.

*(R)*-1-(2,4-difluorophenyl)ethanol **4b**

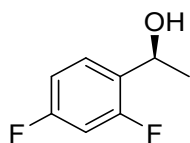

$^1\text{H NMR}$  (400 MHz, Chloroform-*d*)  $\delta$  7.52 – 7.40 (m, 1H), 6.96 – 6.84 (m, 1H), 6.78 (t,  $J = 11.0$  Hz, 1H), 5.15 (q,  $J = 6.5$  Hz, 1H), 2.38 (d,  $J = 12.7$  Hz, 1H), 1.28 (s, 1H), 0.87 (s, 2H).  $^{13}\text{C NMR}$  (101 MHz, Chloroform-*d*)  $\delta$  163.40, 128.54, 127.64, 127.59, 127.55, 127.49, 111.41, 111.37, 111.19, 111.16, 103.89, 103.64, 103.38, 64.01, 63.98, 24.06.

*(R)*-1-(3,4-difluorophenyl)ethan-1-ol **5b**

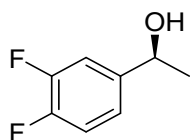

$^1\text{H NMR}$  (400 MHz, Chloroform-*d*)  $\delta$  7.34 – 7.20 (m, 1H), 7.13 (d,  $J = 12.1$  Hz, 2H), 4.91 (s, 1H), 2.03 (s, 1H), 1.51 (s, 3H).  $^{13}\text{C NMR}$  (101 MHz, Chloroform-*d*)  $\delta$  142.92, 121.29, 117.27, 114.55, 69.38, 25.38.

*(S)*-1-(2-chlorophenyl)ethan-1-ol **6b**

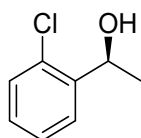

$^1\text{H NMR}$  (400 MHz, Chloroform-*d*)  $\delta$  7.63 (d,  $J = 7.7$  Hz, 1H), 7.33 (s, 2H), 7.24 (d,  $J = 7.0$  Hz, 1H), 5.33 (d,  $J = 6.3$  Hz, 1H), 2.03 (d,  $J = 3.9$  Hz, 1H), 1.53 (d,  $J = 5.8$  Hz, 3H).  $^{13}\text{C NMR}$  (101 MHz, Chloroform-*d*)  $\delta$  143.12, 131.72, 129.48, 128.48, 127.29, 126.48, 67.04, 23.57.

**(S)-3-chloro-1-phenyl-1-propanol 7b**

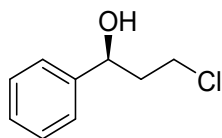

**<sup>1</sup>H NMR** (400 MHz, Chloroform-*d*)  $\delta$  7.42 – 7.33 (m, 2H), 3.83 – 3.51 (m, 1H), 2.33 – 2.07 (m, 2H), 1.31 (d,  $J = 11.2$  Hz, 3H), 0.88 (d,  $J = 9.3$  Hz, 3H). **<sup>13</sup>C NMR** (101 MHz, Chloroform-*d*)  $\delta$  143.73, 128.70, 127.96, 125.81, 71.35, 41.74, 41.46, 37.13, 29.74.

**(S)-1-(4-chlorophenyl)ethan-1-ol 8b**

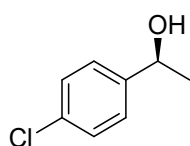

**<sup>1</sup>H NMR** (400 MHz, Chloroform-*d*)  $\delta$  7.33 (s, 4H), 4.89 (d,  $J = 6.4$  Hz, 1H), 2.03 (s, 1H), 1.49 (d,  $J = 5.6$  Hz, 3H). **<sup>13</sup>C NMR** (101 MHz, Chloroform-*d*)  $\delta$  144.32, 133.12, 128.67, 126.87, 69.79, 25.33.

**(R)-2-chloro-1-phenylethanol 9b**

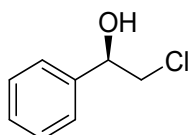

**<sup>1</sup>H NMR** (400 MHz, Chloroform-*d*)  $\delta$  7.41 (d,  $J = 4.4$  Hz, 4H), 4.91 (dd,  $J = 8.7, 3.5$  Hz, 1H), 3.76 (dd,  $J = 11.2, 3.5$  Hz, 1H), 3.73 – 3.62 (m, 1H), 1.31 (s, 1H), 0.96 – 0.84 (m, 1H). **<sup>13</sup>C NMR** (101 MHz, Chloroform-*d*)  $\delta$  140.01, 128.72, 128.50, 126.13, 74.10, 50.86.

**(R)-2-chloro-1-(4-fluorophenyl)ethanol 10b**

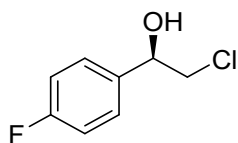

$^1\text{H NMR}$  (400 MHz, Chloroform-*d*)  $\delta$  7.37 (dd,  $J = 8.6, 5.4$  Hz, 2H), 7.08 (t,  $J = 8.7$  Hz, 2H), 4.89 (dd,  $J = 8.7, 3.5$  Hz, 1H), 3.72 (dd,  $J = 11.3, 3.6$  Hz, 1H), 2.94 (s, 0H), 1.29 (s, 1H).  $^{13}\text{C NMR}$  (101 MHz, Chloroform-*d*)  $\delta$  163.91, 161.46, 135.75, 135.72, 127.89, 127.81, 115.71, 115.50, 73.44, 50.76, 29.73.

**(R)-1-(4-bromophenyl)ethan-1-ol 11b**

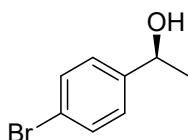

$^1\text{H NMR}$  (400 MHz, Chloroform-*d*)  $\delta$  7.47 (d,  $J = 8.4$  Hz, 2H), 7.23 (d,  $J = 8.5$  Hz, 2H), 4.83 (q,  $J = 6.5$  Hz, 1H), 2.40 (s, 1H), 1.46 (d,  $J = 6.5$  Hz, 3H).  $^{13}\text{C NMR}$  (101 MHz, Chloroform-*d*)  $\delta$  144.80, 131.55, 127.19, 121.14, 69.73, 25.23.

**(R)-1-(2-bromo-4-fluorophenyl)ethanol 12b**

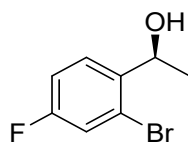

$^1\text{H NMR}$  (400 MHz, Chloroform-*d*)  $\delta$  7.58 (dd,  $J = 8.7, 6.1$  Hz, 1H), 7.27 (dd,  $J = 8.2, 2.6$  Hz, 1H), 7.08 (td,  $J = 8.3, 2.6$  Hz, 1H), 5.21 (q,  $J = 6.4$  Hz, 1H), 1.48 (s, 2H), 1.29 (d,  $J = 11.7$  Hz, 1H), 0.87 (d,  $J = 6.7$  Hz, 1H).  $^{13}\text{C NMR}$  (101 MHz, Chloroform-*d*)  $\delta$  162.68, 160.20, 140.61, 140.58, 127.77, 127.69, 121.50, 121.41, 119.81, 119.57, 115.07, 114.86, 68.67, 29.73, 23.78.

(*S*)-2-chloro-1-(2,4-difluorophenyl)ethanol **13b**

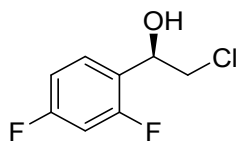

$^1\text{H NMR}$  (400 MHz, Chloroform-*d*)  $\delta$  7.58 – 7.50 (m, 1H), 6.96 – 6.80 (m, 2H), 5.19 (dd,  $J = 8.3, 3.3$  Hz, 1H), 3.82 (dd,  $J = 11.2, 3.3$  Hz, 1H), 3.63 (dd,  $J = 11.2, 8.3$  Hz, 1H), 1.28 (s, 1H), 0.86 (d,  $J = 5.4$  Hz, 1H).  $^{13}\text{C NMR}$  (101 MHz, Chloroform-*d*)  $\delta$  164.09, 128.70, 128.64, 128.61, 128.55, 111.77, 111.73, 111.56, 111.52, 104.14, 103.88, 103.63, 67.84, 49.56, 29.73.

(*S*)-1-(3-chlorophenyl)ethan-1-ol **14b**

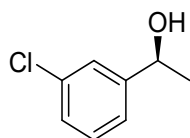

$^1\text{H NMR}$  (400 MHz, Chloroform-*d*)  $\delta$  7.41 (s, 1H), 7.29 (s, 3H), 4.90 (s, 1H), 2.08 (s, 1H), 1.51 (d,  $J = 3.3$  Hz, 3H).  $^{13}\text{C NMR}$  (101 MHz, Chloroform-*d*)  $\delta$  147.92, 134.42, 129.86, 127.59, 125.70, 123.61, 69.85, 25.29.

(*R*)-1-(2-bromophenyl)ethan-1-ol **15b**

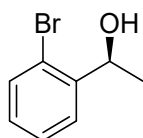

$^1\text{H NMR}$  (400 MHz, Chloroform-*d*)  $\delta$  7.63 (d,  $J = 7.6$  Hz, 1H), 7.55 (d,  $J = 7.9$  Hz, 1H), 7.39 (t,  $J = 7.7$  Hz, 1H), 7.18 (d,  $J = 8.0$  Hz, 1H), 5.28 (d,  $J = 3.9$  Hz, 1H), 1.95 (s, 1H), 1.53 (dd,  $J = 6.1, 2.6$  Hz, 3H).  $^{13}\text{C NMR}$  (101 MHz, Chloroform-*d*)  $\delta$  144.66, 132.74, 128.86, 127.93, 126.73, 121.80, 69.27, 23.63.

(*S*)-2-chloro-1-(3,4-difluorophenyl)ethan-1-ol **16b**

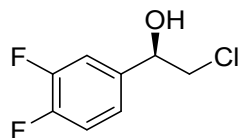

$^1\text{H NMR}$  (400 MHz, Chloroform-*d*)  $\delta$  7.31 – 7.10 (m, 3H), 4.88 (dd,  $J = 8.5, 3.5$  Hz, 1H), 3.73 (dd,  $J = 11.3, 3.5$  Hz, 1H), 3.60 (dd,  $J = 11.3, 8.5$  Hz, 1H), 1.29 (d,  $J = 11.1$  Hz, 1H), 0.87 (d,  $J = 2.7$  Hz, 1H).  $^{13}\text{C NMR}$  (101 MHz, Chloroform-*d*)  $\delta$  151.74, 151.61, 151.48, 151.36, 149.27, 149.01, 148.89, 136.97, 122.21, 122.18, 122.15, 122.11, 117.55, 117.38, 115.34, 115.16, 72.89, 50.50, 29.72.

(*S*)-1-[4-(trifluoromethyl)phenyl]ethan-1-ol **17b**

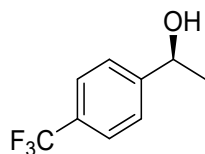

$^1\text{H NMR}$  (400 MHz, Chloroform-*d*)  $\delta$  7.61 (d,  $J = 8.1$  Hz, 2H), 7.48 (d,  $J = 8.1$  Hz, 2H), 4.95 (q,  $J = 6.5$  Hz, 1H), 1.50 (d,  $J = 6.5$  Hz, 3H), 1.29 (s, 1H).  $^{13}\text{C NMR}$  (101 MHz, Chloroform-*d*)  $\delta$  149.70, 125.66, 125.49, 125.46, 125.42, 69.80, 29.73, 25.32.

(*R*)-1-(3-bromophenyl)ethan-1-ol **18b**

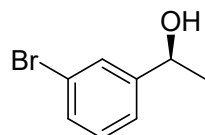

$^1\text{H NMR}$  (400 MHz, Chloroform-*d*)  $\delta$  7.57 (s, 1H), 7.43 (s, 1H), 7.32 (s, 1H), 7.25 (s, 1H), 4.90 (d,  $J = 6.5$  Hz, 1H), 1.93 (s, 1H), 1.51 (s, 3H).  $^{13}\text{C NMR}$  (101 MHz, Chloroform-*d*)  $\delta$  148.18, 130.55, 130.17, 128.64, 124.09, 122.68, 69.83, 25.33.

(*S*)-2-chloro-1-(4-chlorophenyl)ethanol **19b**

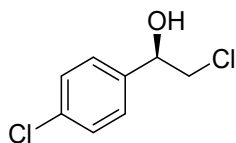

$^1\text{H NMR}$  (400 MHz, Chloroform-*d*)  $\delta$  7.35 (d,  $J = 6.3$  Hz, 2H), 4.89 (dd,  $J = 8.6, 3.5$  Hz, 1H), 3.74 – 3.60 (m, 2H), 2.90 (s, 1H), 1.29 (s, 1H), 0.88 (d,  $J = 2.8$  Hz, 1H).  $^{13}\text{C NMR}$  (101 MHz, Chloroform-*d*)  $\delta$  138.40, 134.24, 128.87, 127.49, 73.38, 50.65, 29.74.

(*R*)-1-(3-bromophenyl)propanol **20b**

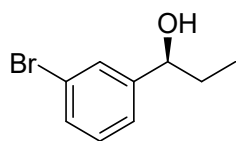

$^1\text{H NMR}$  (400 MHz, Chloroform-*d*)  $\delta$  7.53 (s, 1H), 7.42 (dt,  $J = 7.6, 1.7$  Hz, 1H), 7.33 – 7.17 (m, 2H), 4.60 (t,  $J = 6.5$  Hz, 1H), 1.84 – 1.73 (m, 1H), 1.28 (s, 2H), 0.94 (t,  $J = 7.4$  Hz, 1H), 0.87 (t,  $J = 3.5$  Hz, 2H).  $^{13}\text{C NMR}$  (101 MHz, Chloroform-*d*)  $\delta$  146.95, 130.53, 130.00, 129.10, 124.62, 122.58, 75.30, 37.12, 31.97, 29.73, 29.39, 22.72, 14.16, 10.00.

(*R*)-1-(3,4-dichlorophenyl)ethan-1-ol **21b**

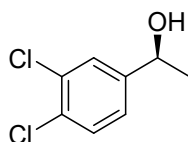

$^1\text{H NMR}$  (400 MHz, Chloroform-*d*)  $\delta$  7.53 (s, 1H), 7.46 (d,  $J = 8.3$  Hz, 1H), 7.26 (s, 1H), 4.92 (s, 1H), 1.92 (s, 1H), 1.53 (s, 3H).  $^{13}\text{C NMR}$  (101 MHz, Chloroform-*d*)  $\delta$  146.06, 132.58, 131.24, 130.51, 127.56, 124.85, 69.31, 25.37.



(*S*)-1-(4-bromophenyl)-2-chloroethanol **22b**

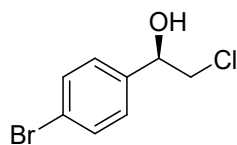

$^1\text{H NMR}$  (400 MHz, Chloroform-*d*)  $\delta$  7.53 (d,  $J = 8.5$  Hz, 2H), 7.30 (d,  $J = 8.8$  Hz, 2H), 4.90 (dd,  $J = 8.6, 3.5$  Hz, 1H), 4.14 (q,  $J = 7.1$  Hz, 1H), 3.74 (dd,  $J = 11.3, 3.5$  Hz, 1H), 3.63 (dd,  $J = 11.2, 8.7$  Hz, 1H).  $^{13}\text{C NMR}$  (101 MHz, Chloroform-*d*)  $\delta$  138.87, 131.83, 127.79, 122.40, 73.41, 50.66, 37.12, 32.80, 31.95, 29.73, 29.39.

(*R*)-2-chloro-1-(2,4-dichlorophenyl)ethan-1-ol **23b**

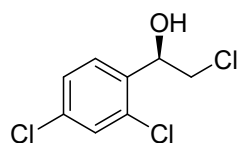

$^1\text{H NMR}$  (400 MHz, Chloroform-*d*)  $\delta$  7.59 (d,  $J = 8.4$  Hz, 1H), 7.40 (d,  $J = 2.1$  Hz, 1H), 7.33 (dd,  $J = 8.4, 2.1$  Hz, 1H), 5.28 (dt,  $J = 8.4, 3.2$  Hz, 1H), 3.89 (dd,  $J = 11.3, 2.8$  Hz, 1H), 3.54 (dd,  $J = 11.3, 8.5$  Hz, 1H), 2.87 (d,  $J = 3.6$  Hz, 1H).  $^{13}\text{C NMR}$  (101 MHz, Chloroform-*d*)  $\delta$  135.89, 134.65, 132.49, 129.33, 128.56, 127.61, 70.31, 49.18.

(*S*)-2-chloro-1-(3,4-dichlorophenyl)ethan-1-ol **24b**

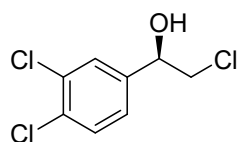

$^1\text{H NMR}$  (400 MHz, Chloroform-*d*)  $\delta$  7.59 – 7.44 (m, 2H), 7.25 (d,  $J = 10.5$  Hz, 2H), 4.90 (dd,  $J = 8.5, 3.5$  Hz, 1H), 3.75 (dd,  $J = 11.3, 3.5$  Hz, 1H), 3.62 (dd,  $J = 11.3, 8.5$  Hz, 1H).  $^{13}\text{C NMR}$  (101 MHz, Chloroform-*d*)  $\delta$  140.07, 132.92, 130.65, 128.88, 128.83, 128.20, 126.85, 125.42, 72.79, 50.48.

(*S*)-1-[3,5-bis(trifluoromethyl)phenyl]ethanol **25b**

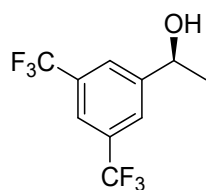

**<sup>1</sup>H NMR** (400 MHz, Chloroform-*d*)  $\delta$  1.30 (d,  $J = 10.9$  Hz, 4H), 0.87 (s, 4H). **<sup>13</sup>C NMR** (101 MHz, Chloroform-*d*)  $\delta$  148.24, 125.69, 125.65, 121.33, 69.29, 30.06, 29.76, 29.73, 29.69, 25.63, 22.72, 14.15.

# NMR spectra of compounds

## (S)-1-(2-fluorophenyl)ethan-1-ol **1b**

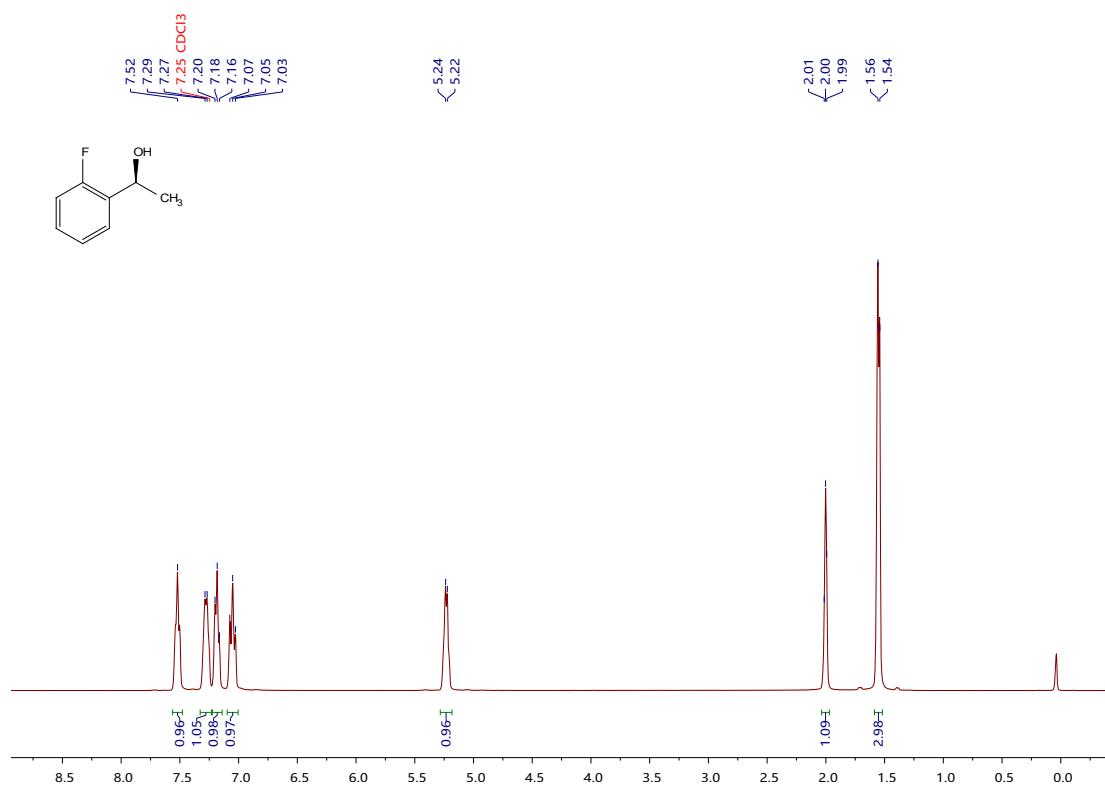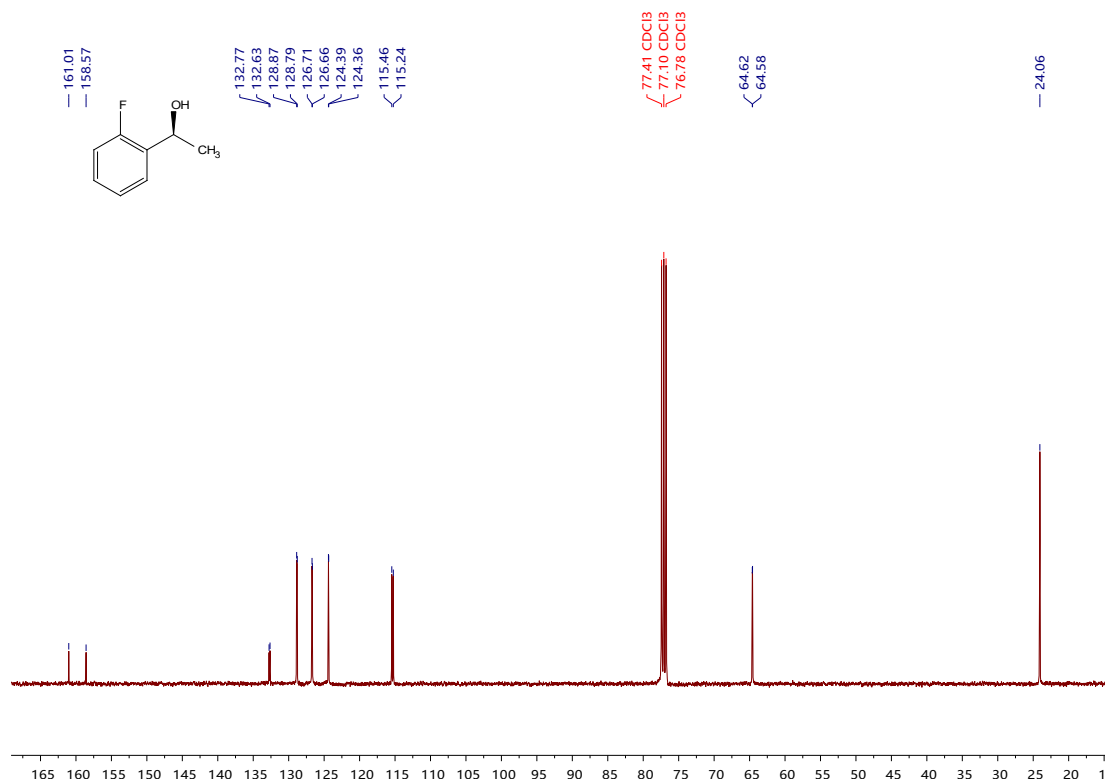

(S)-1-(4-fluorophenyl)ethan-1-ol **2b**

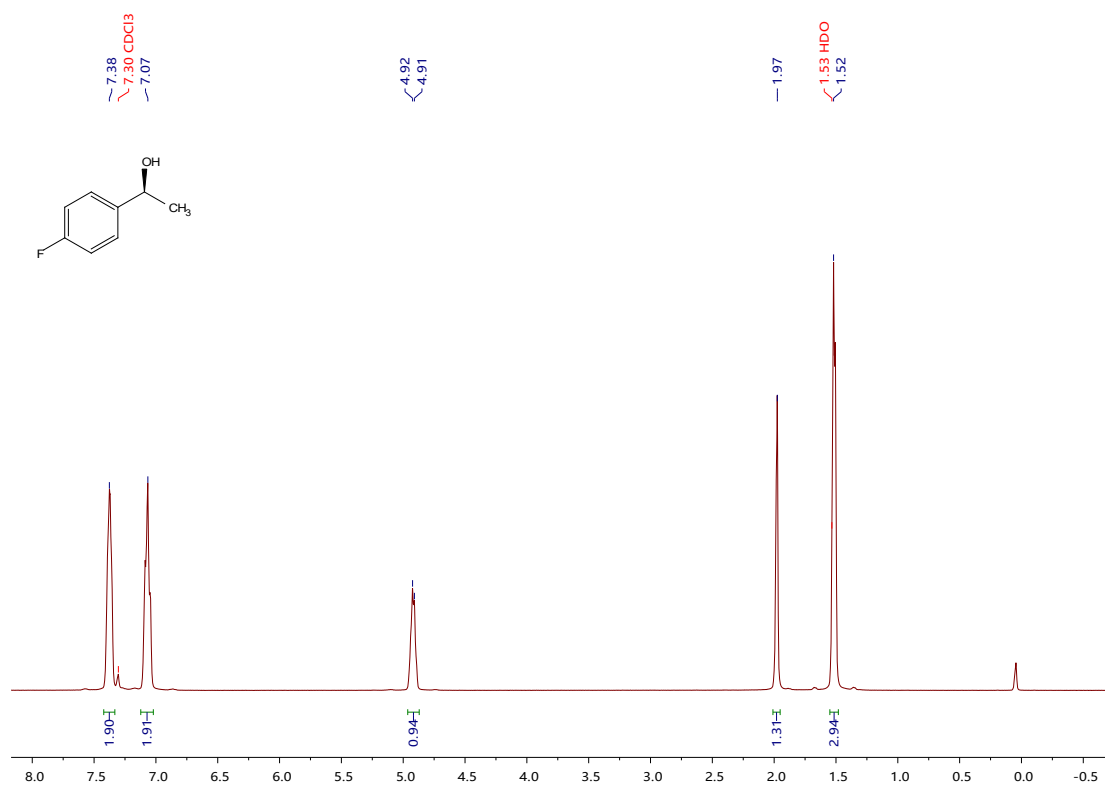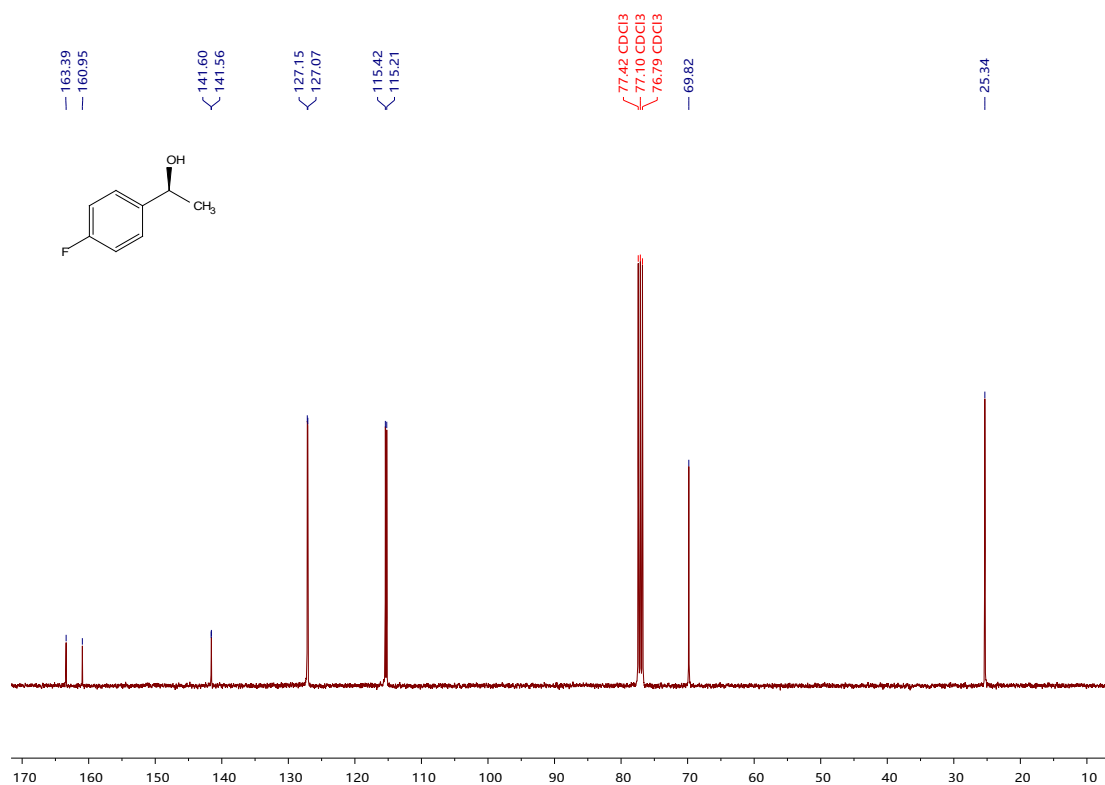

(S)-1-(3-fluorophenyl)ethan-1-ol **3b**

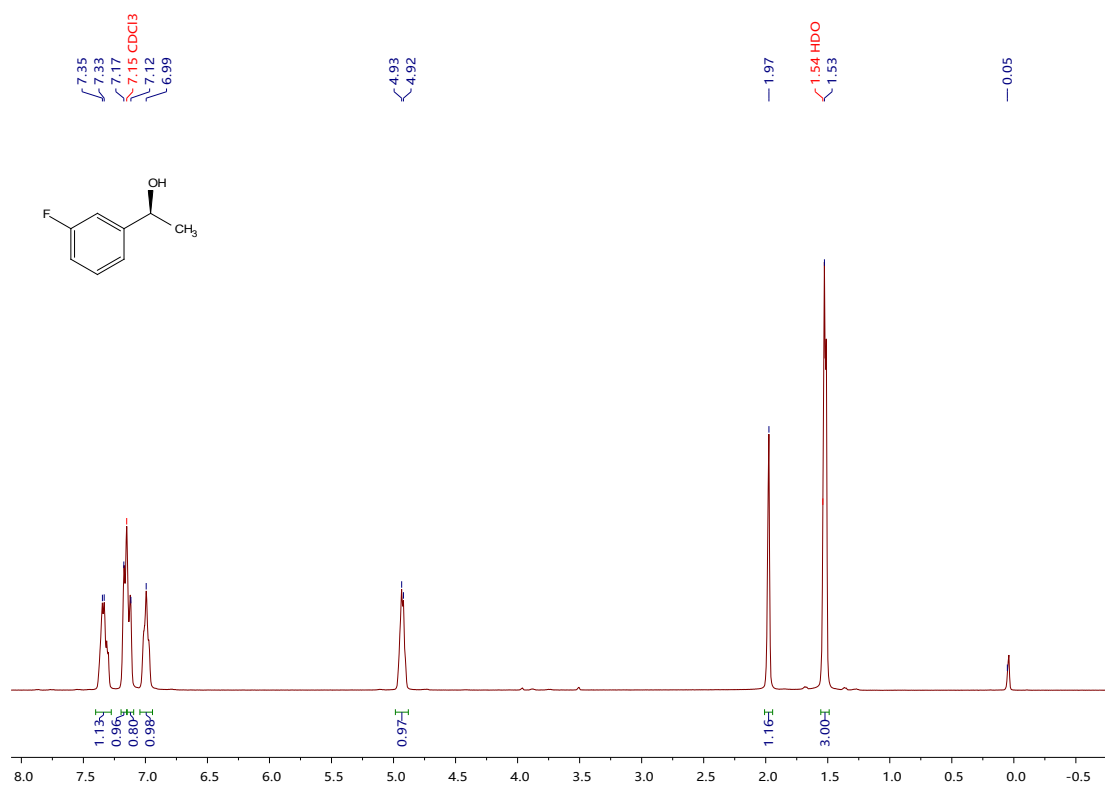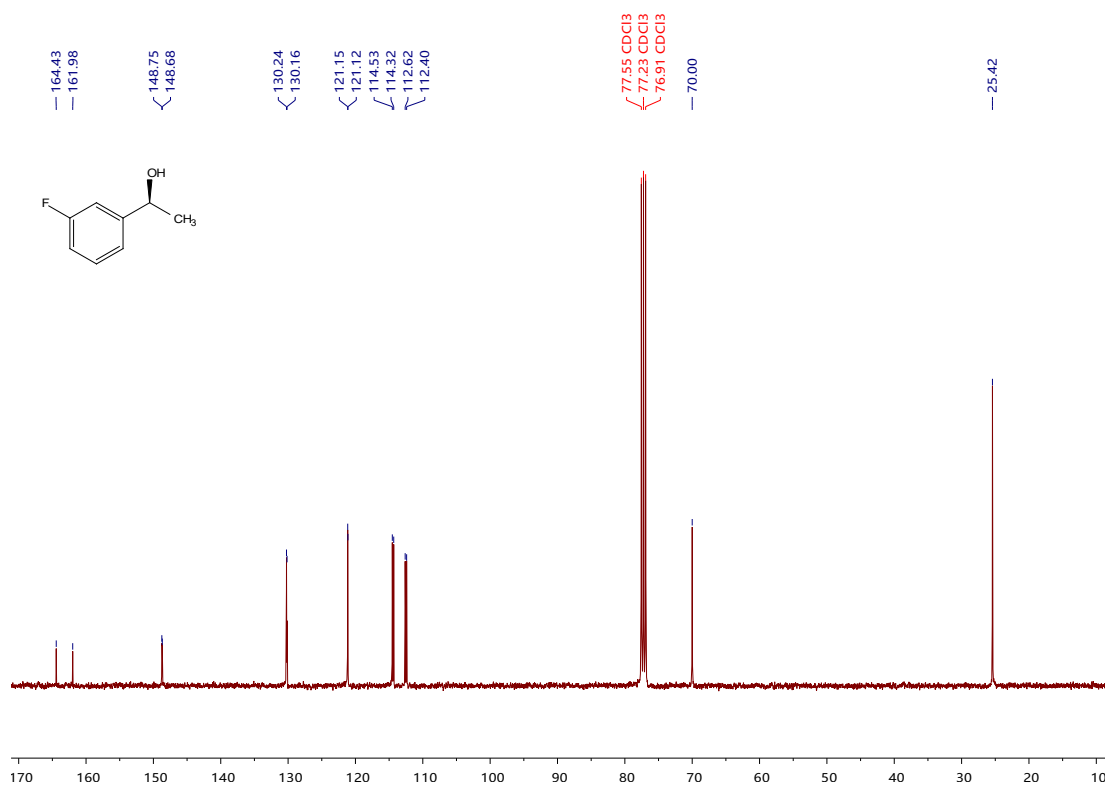

**(R)-1-(2,4-difluorophenyl)ethanol 4b**

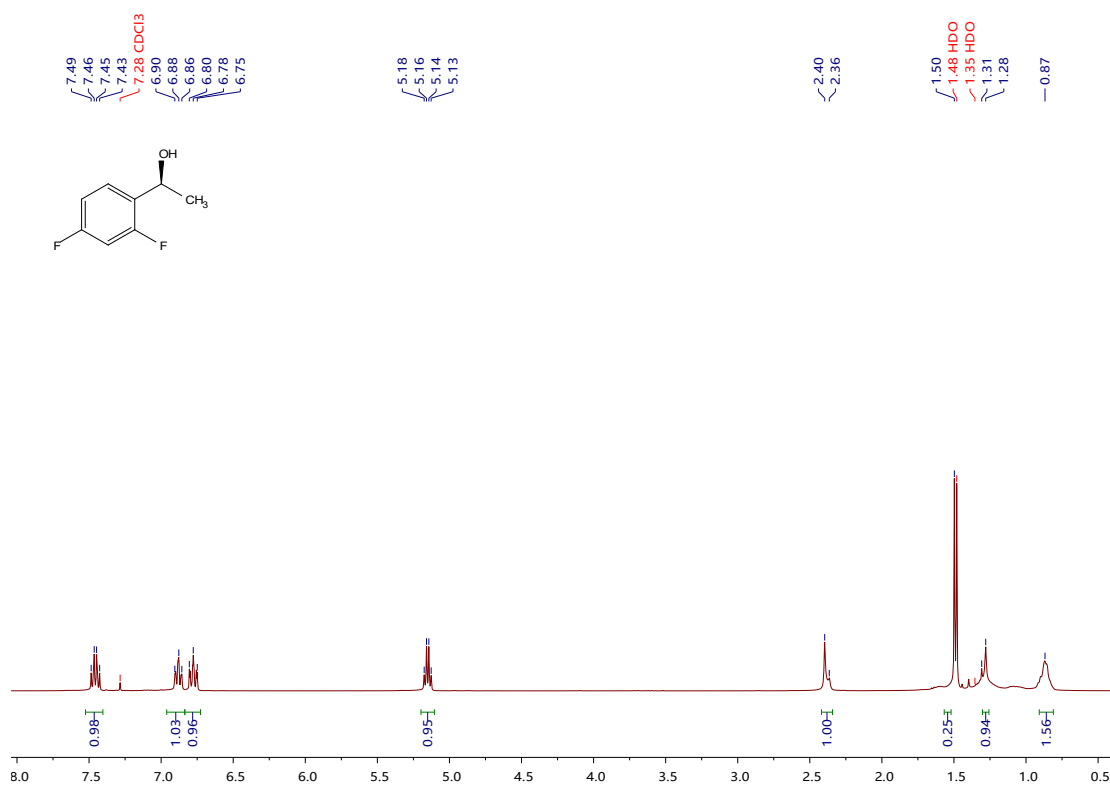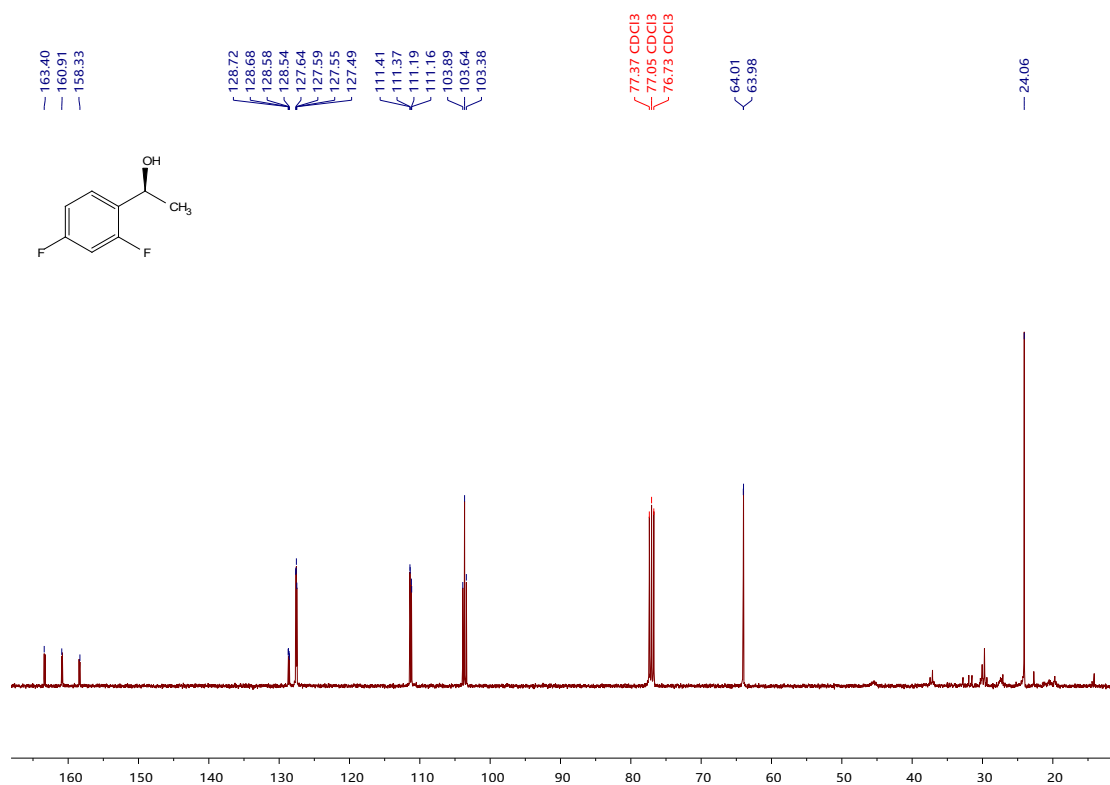

**(R)-1-(3,4-difluorophenyl)ethan-1-ol 5b**

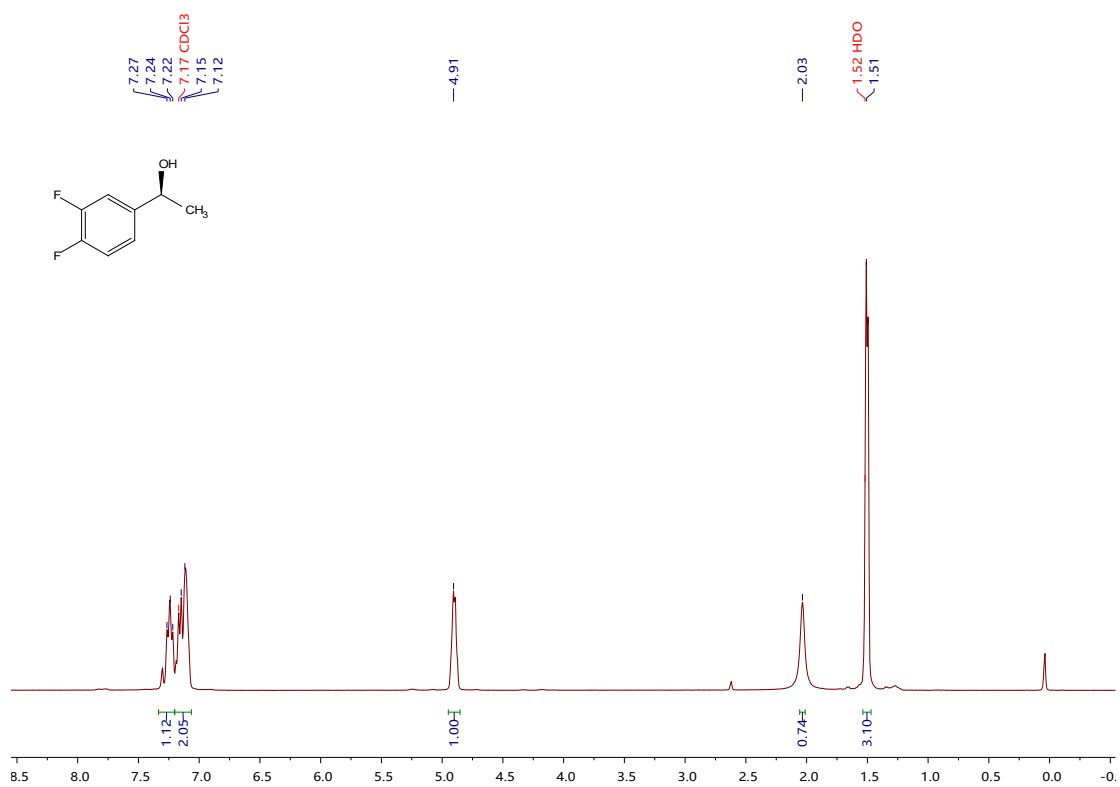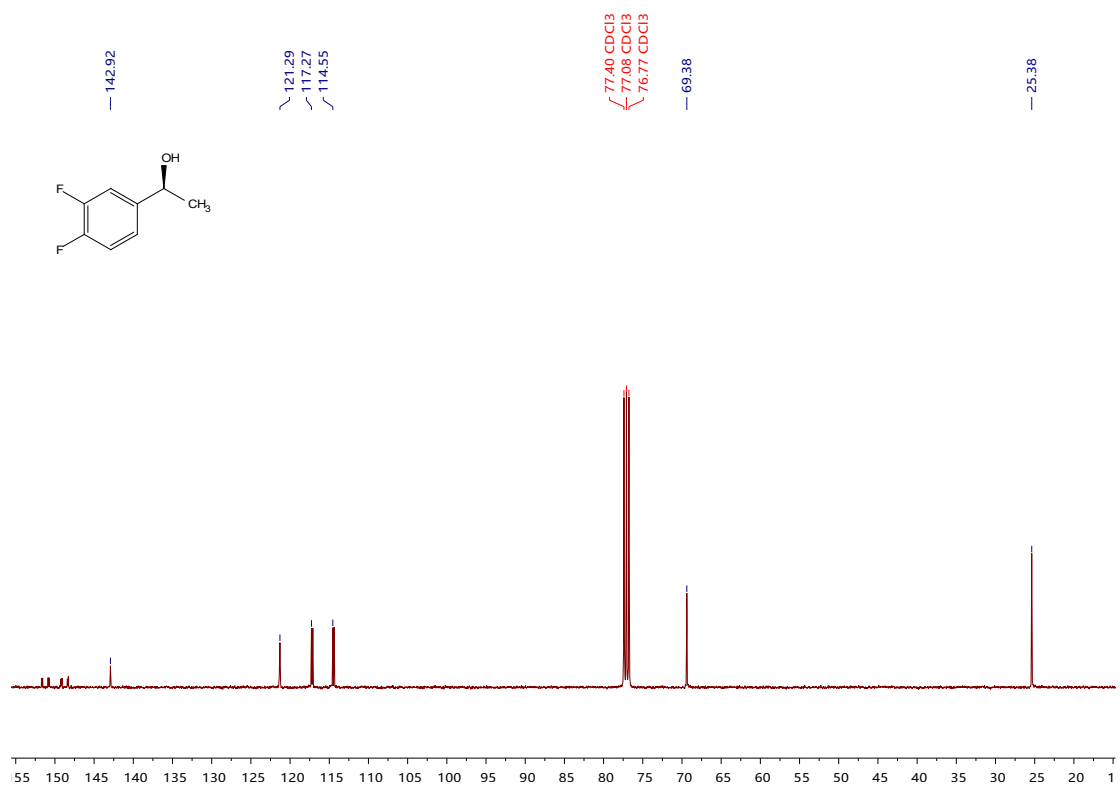

(S)-1-(2-chlorophenyl)ethan-1-ol **6b**

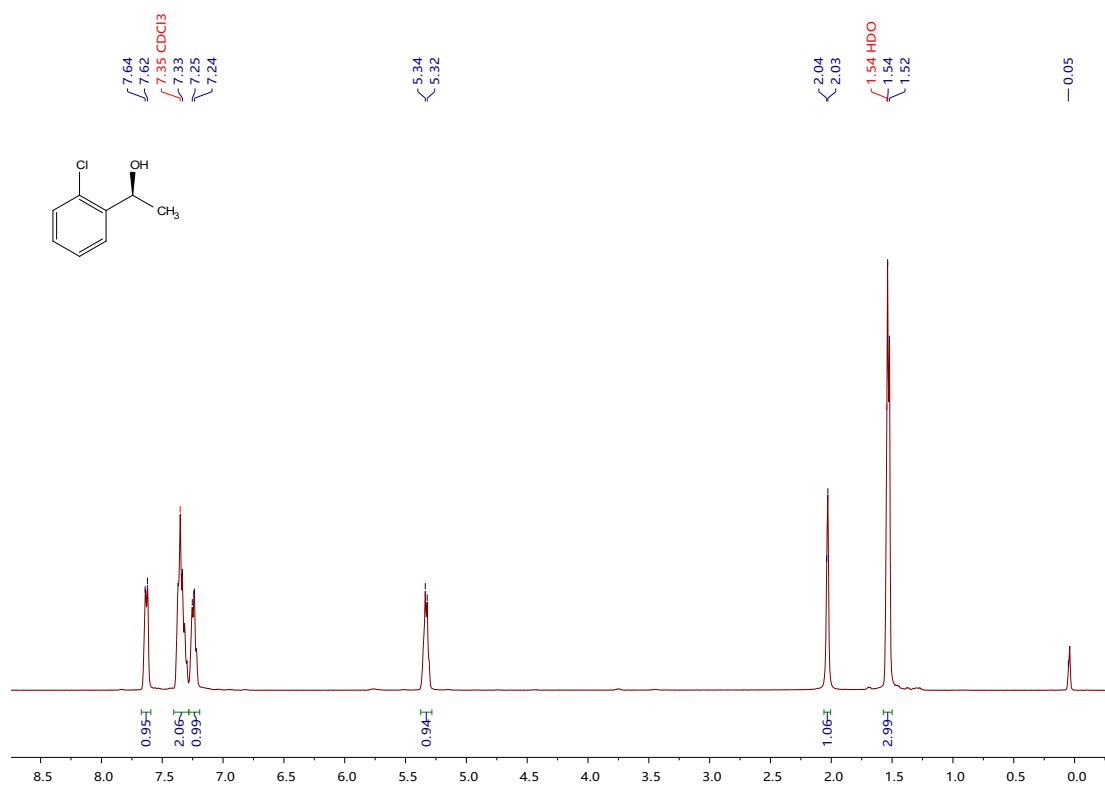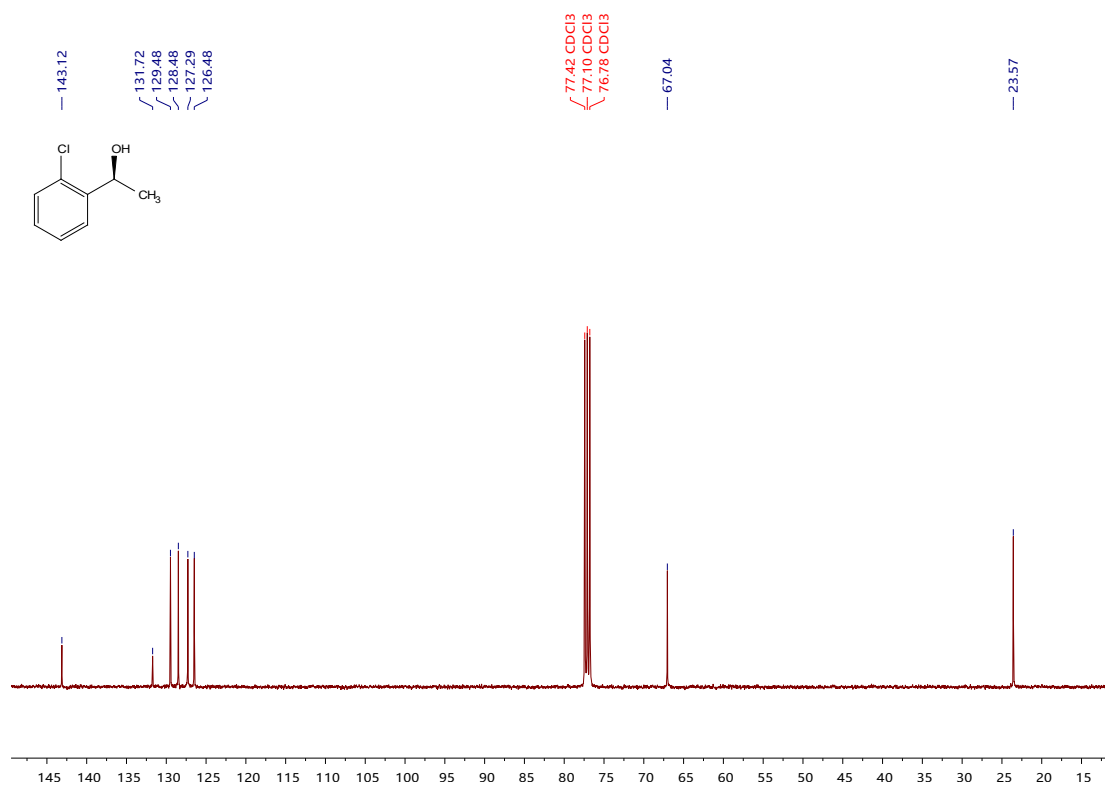



# (S)-3-chloro-1-phenyl-1-propanol **7b**

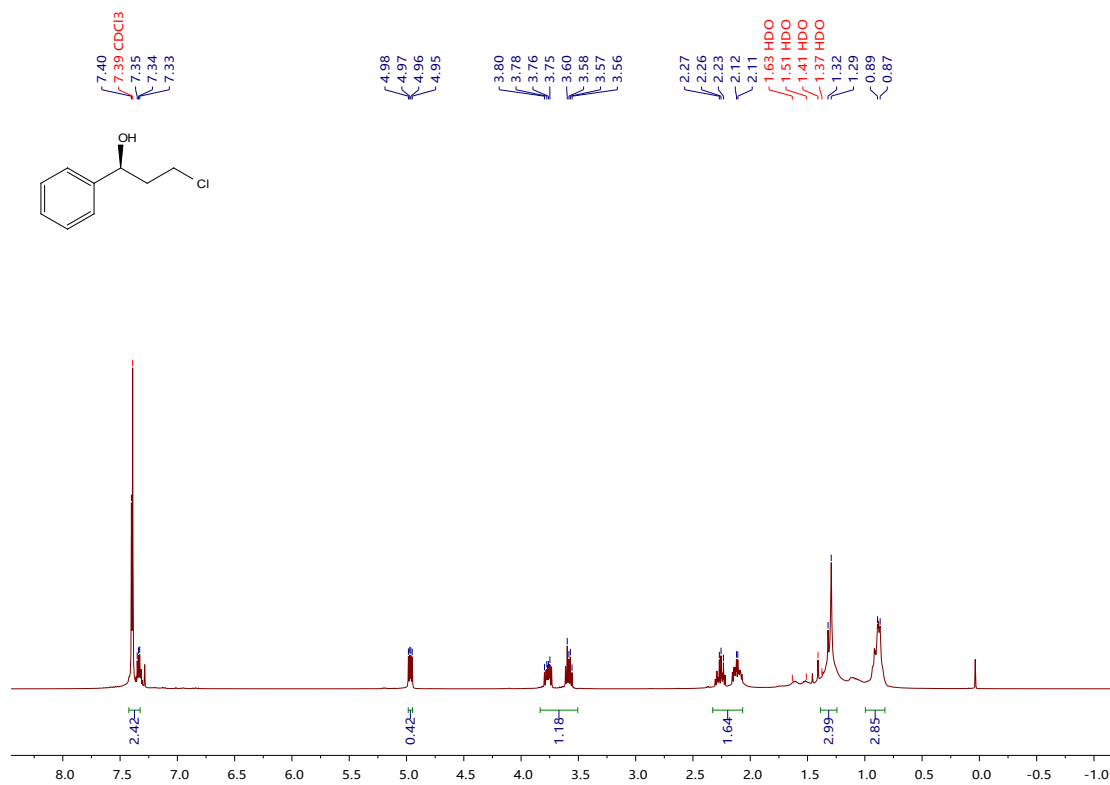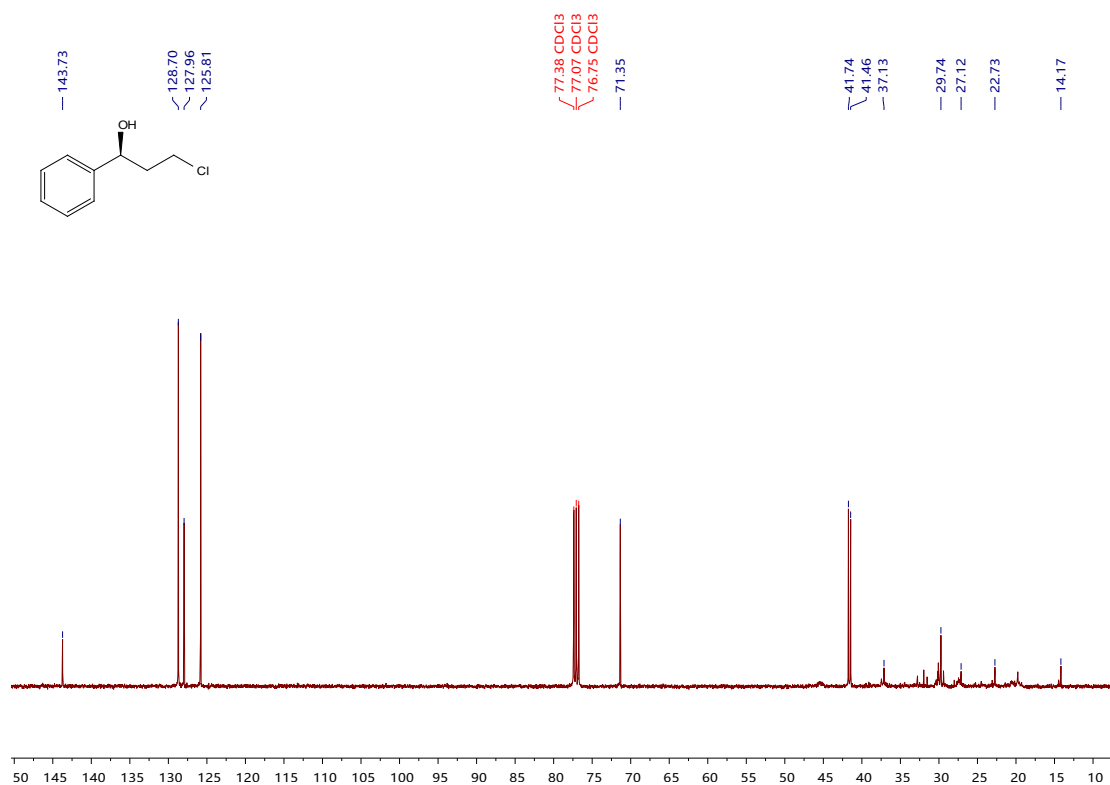

(S)-1-(4-chlorophenyl)ethan-1-ol **8b**

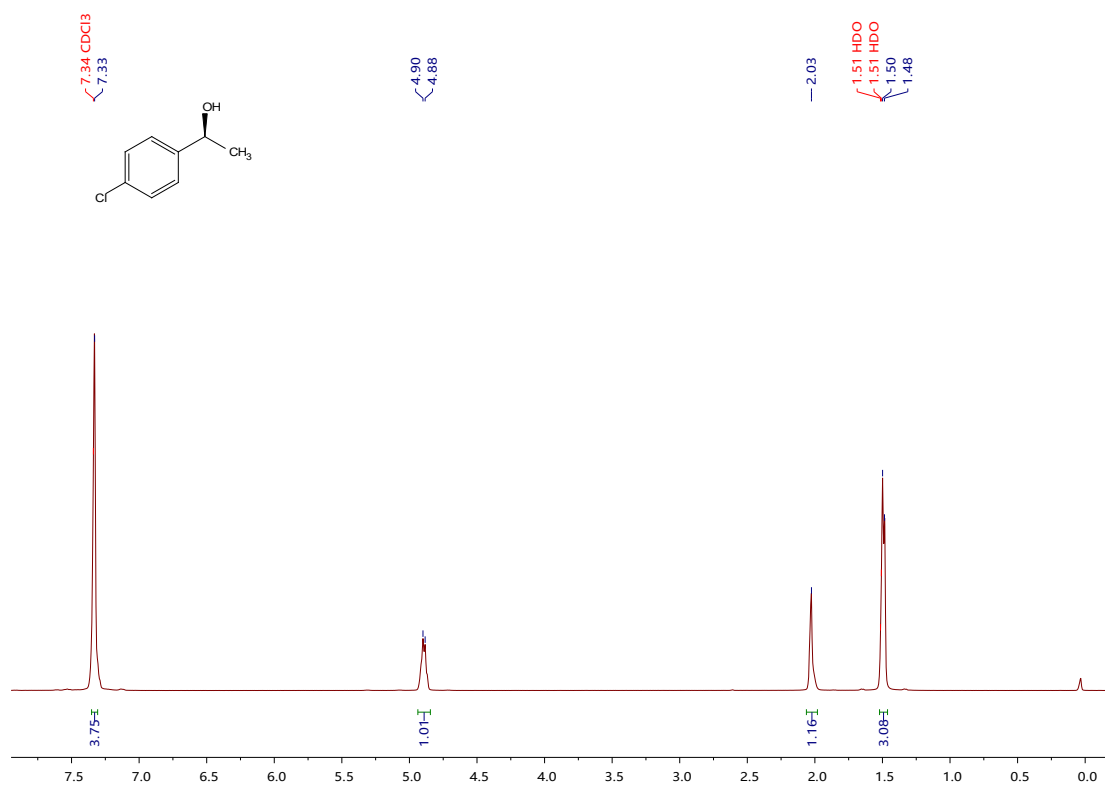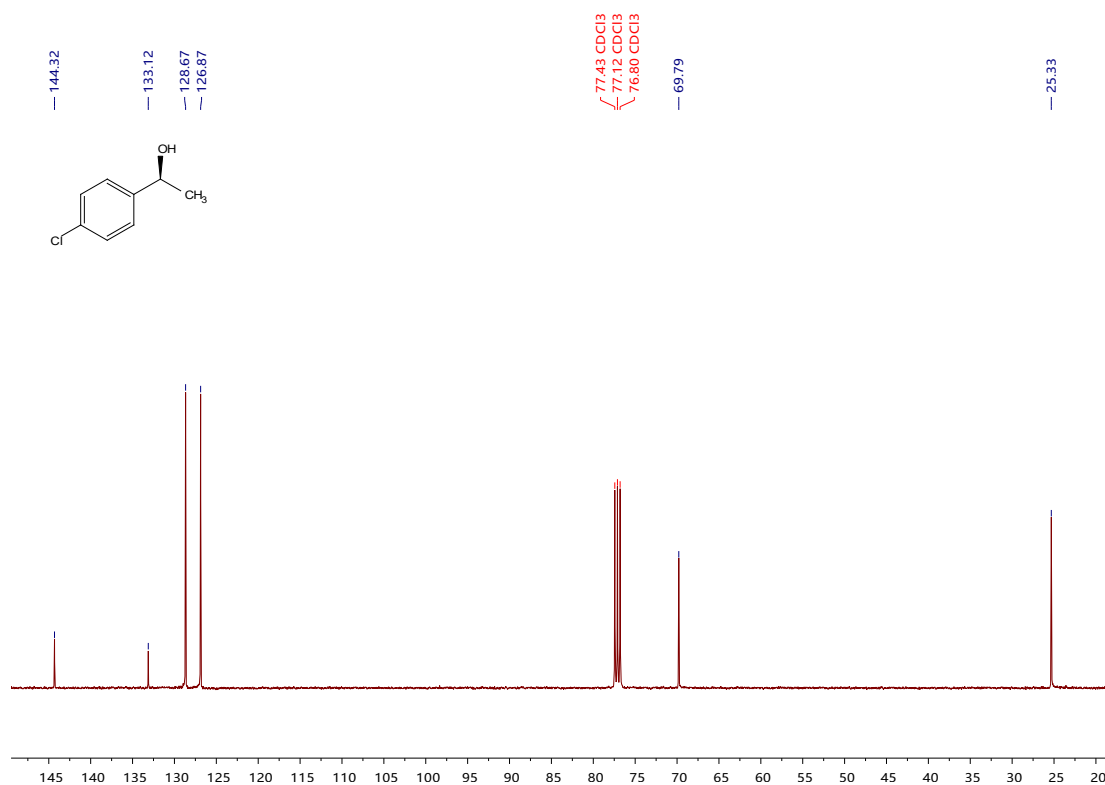

**(R)-2-chloro-1-phenylethanol 9b**

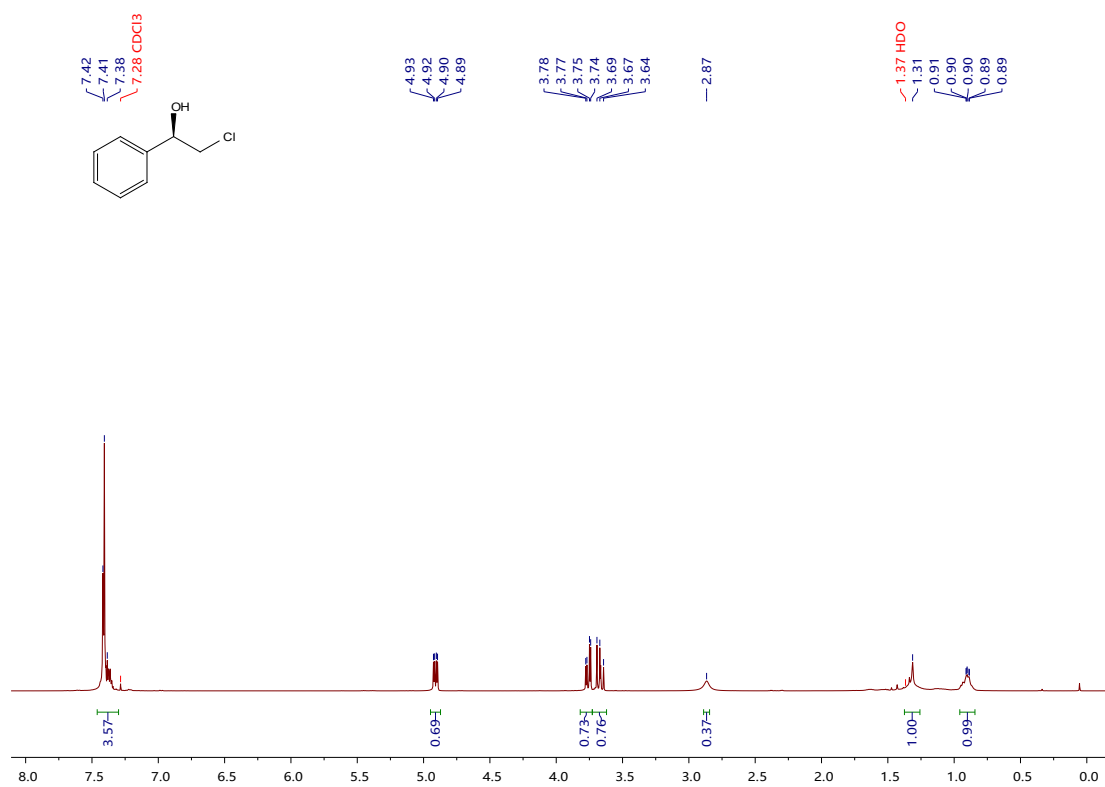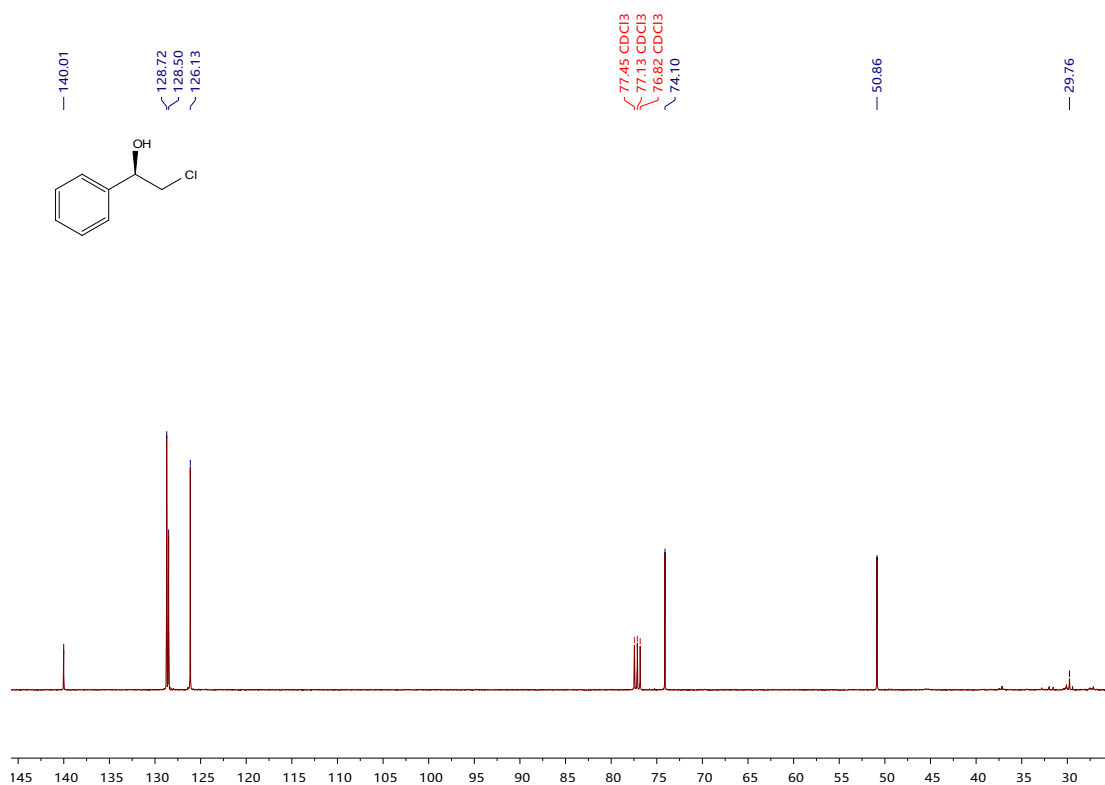

**(R)-2-chloro-1-(4-fluorophenyl)ethanol 10b**

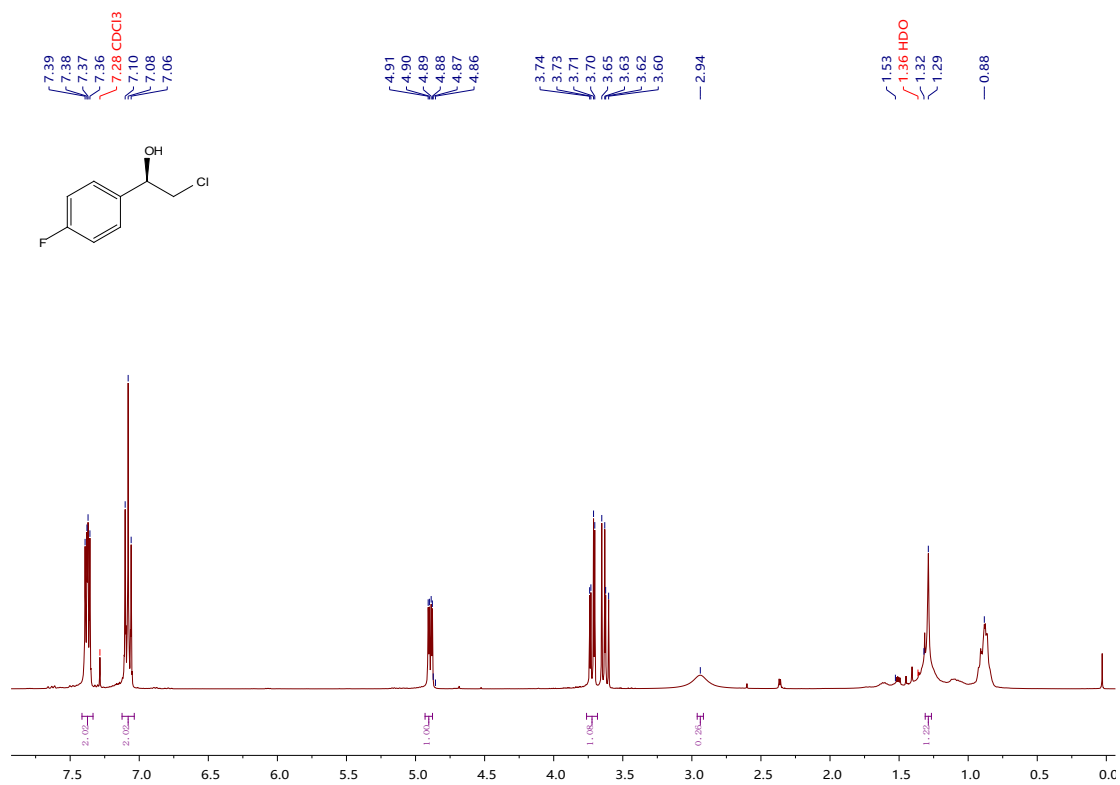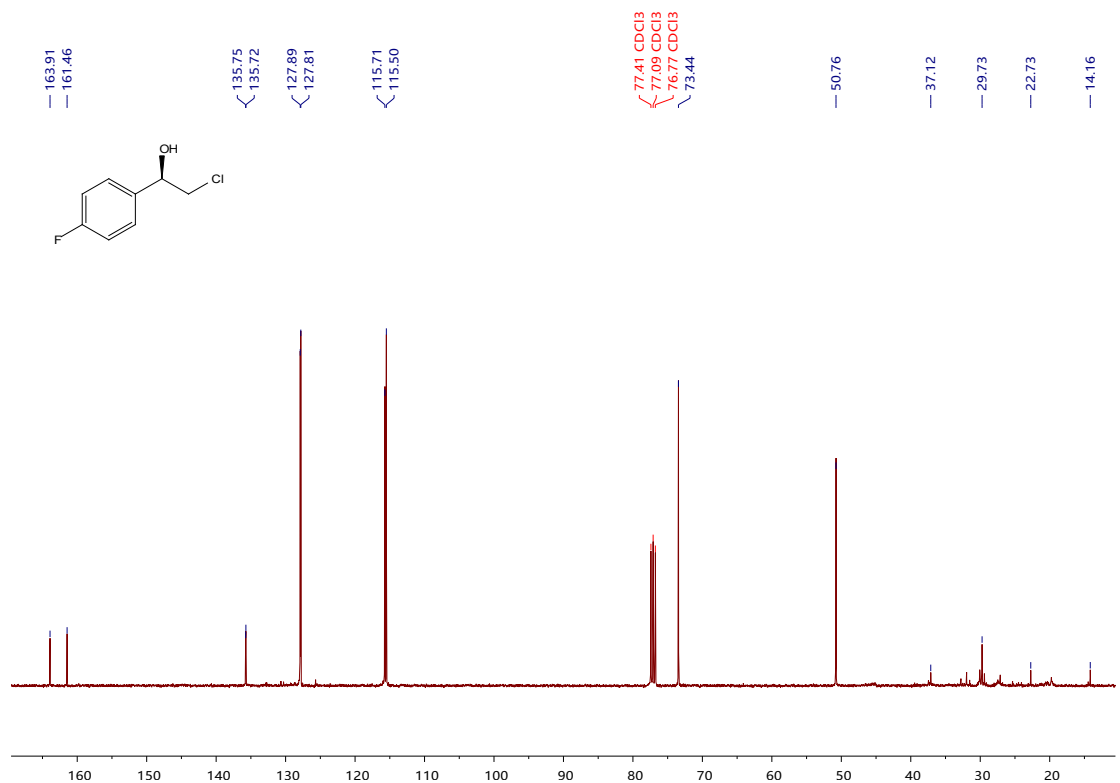

**(R)-1-(4-bromophenyl)ethan-1-ol 11b**

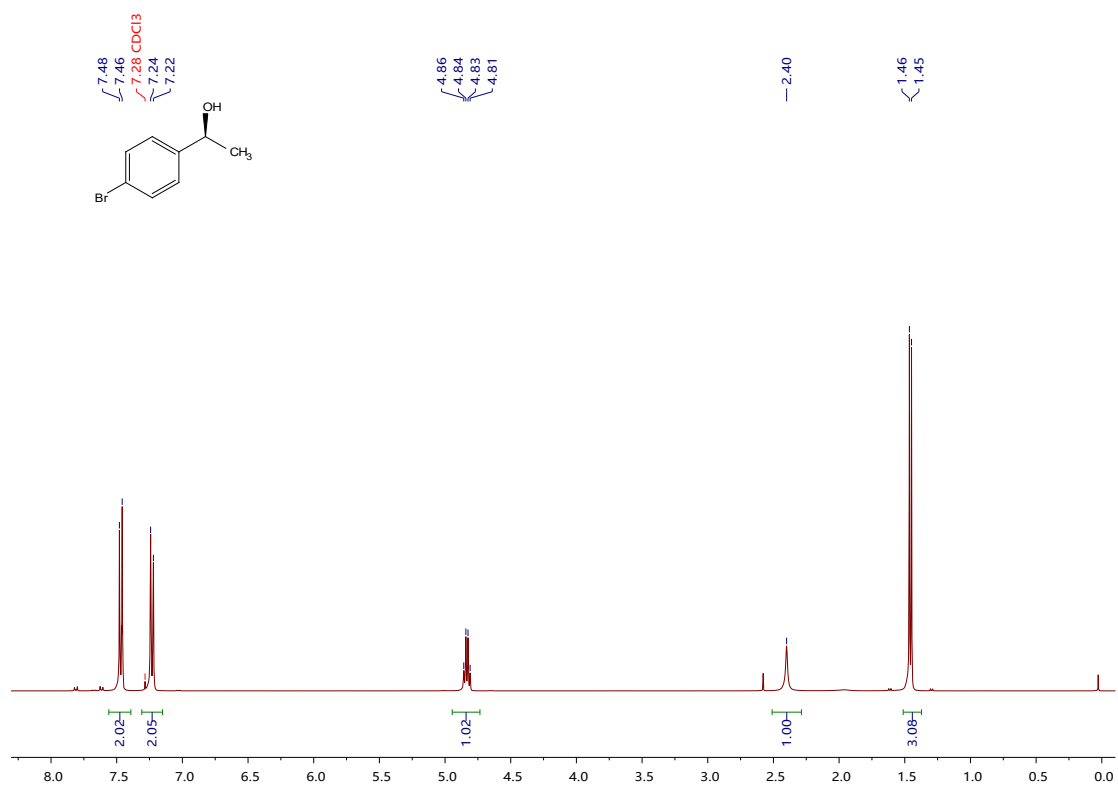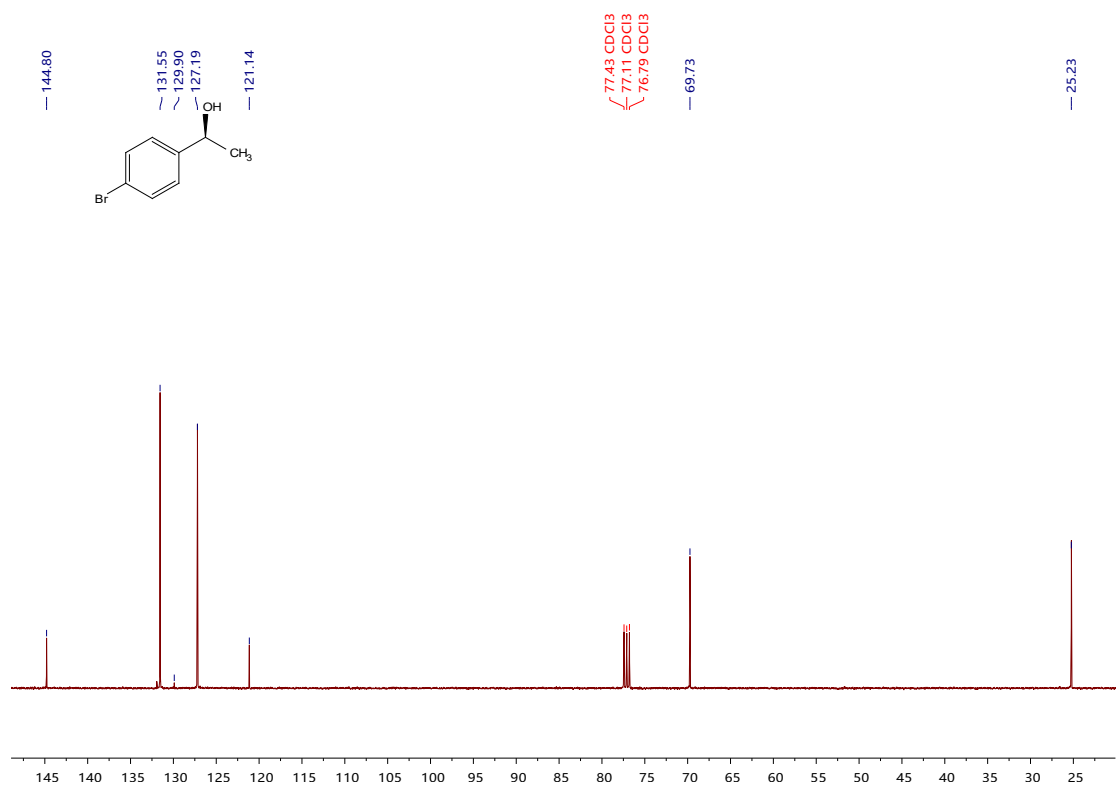

**(R)-1-(2-bromo-4-fluorophenyl)ethanol 12b**

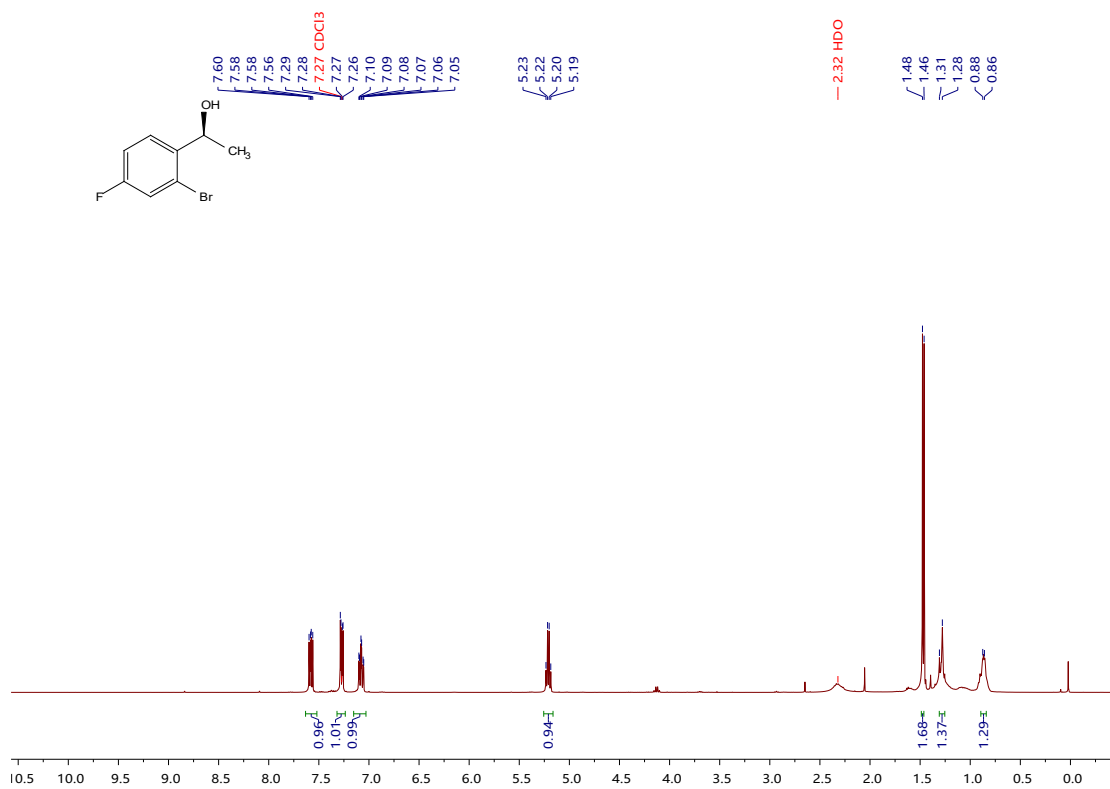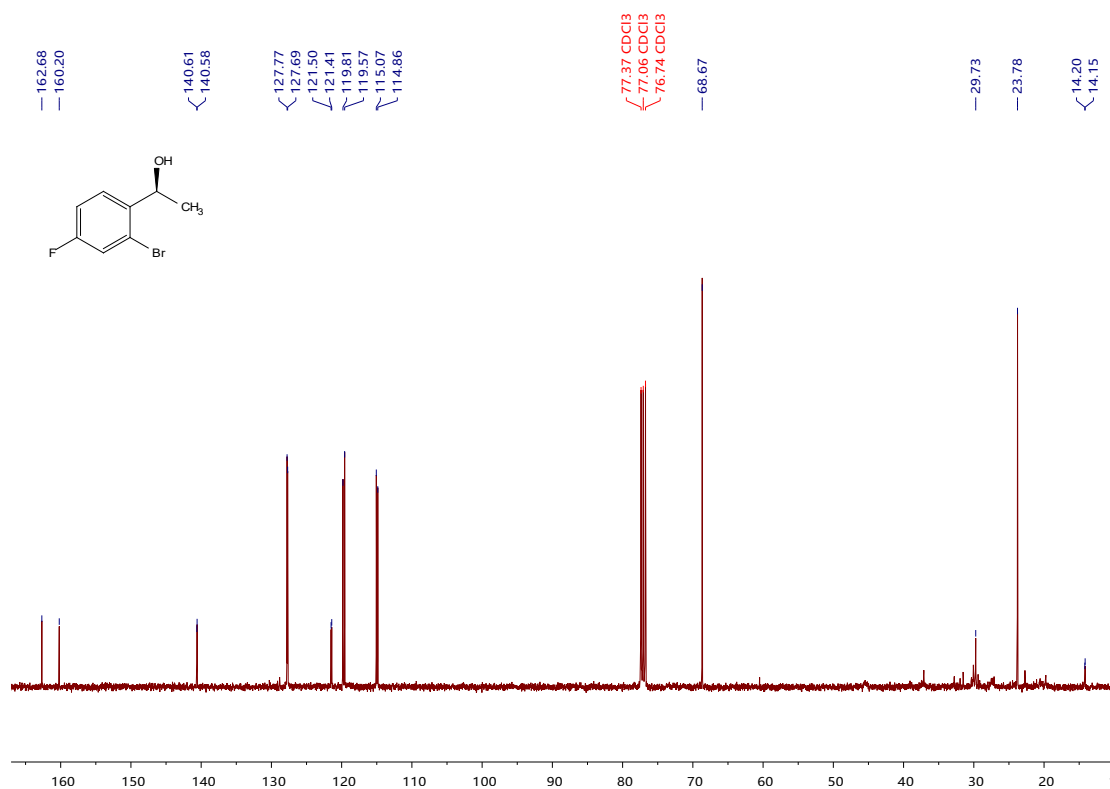

(S)-2-chloro-1-(2,4-difluorophenyl)ethanol **13b**

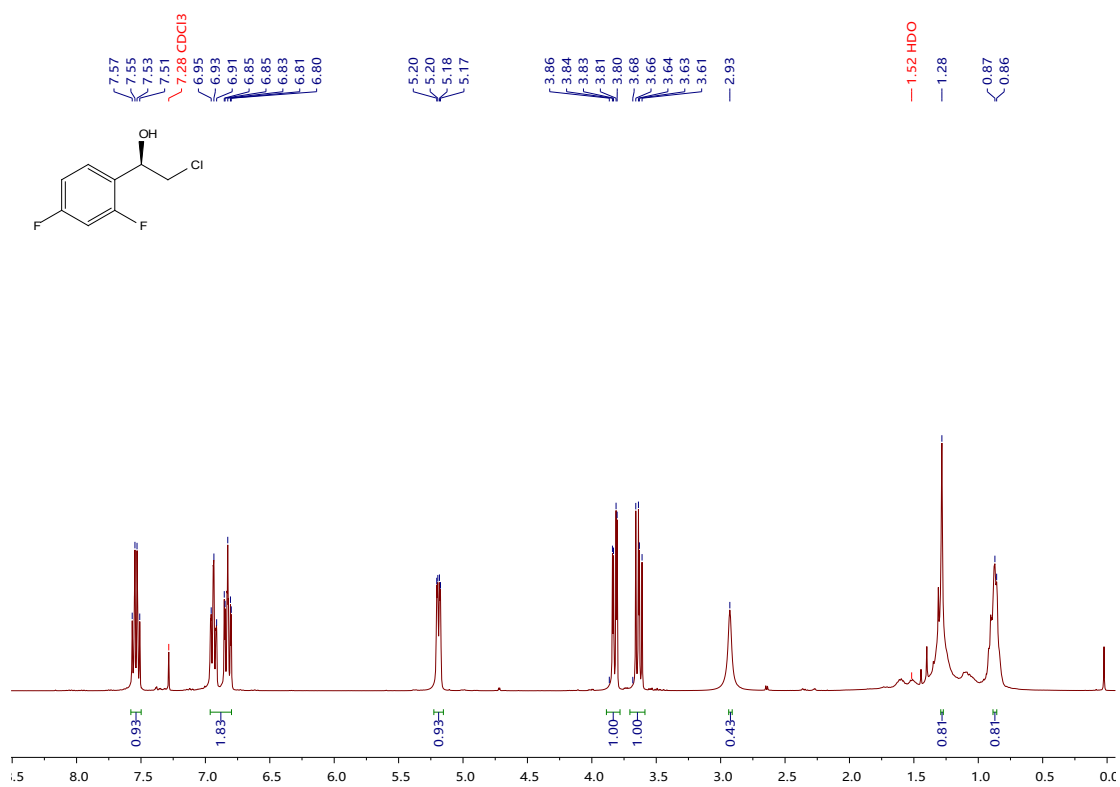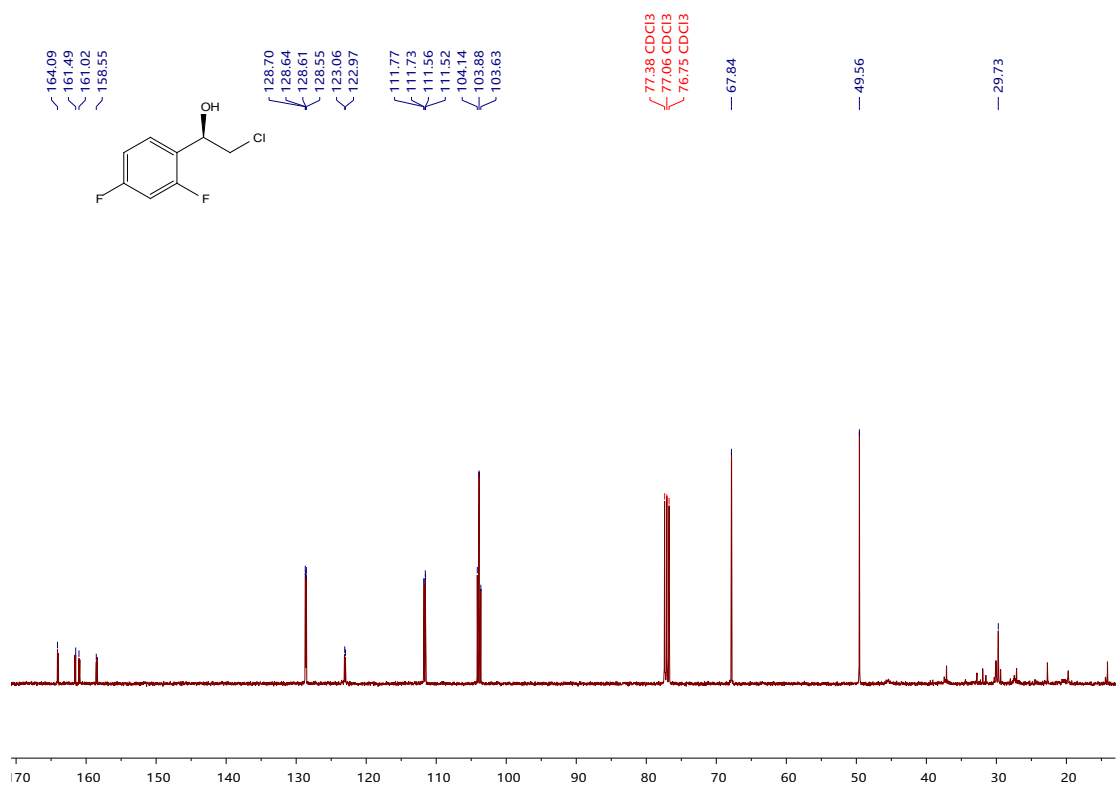

(S)-1-(3-chlorophenyl)ethan-1-ol **14b**

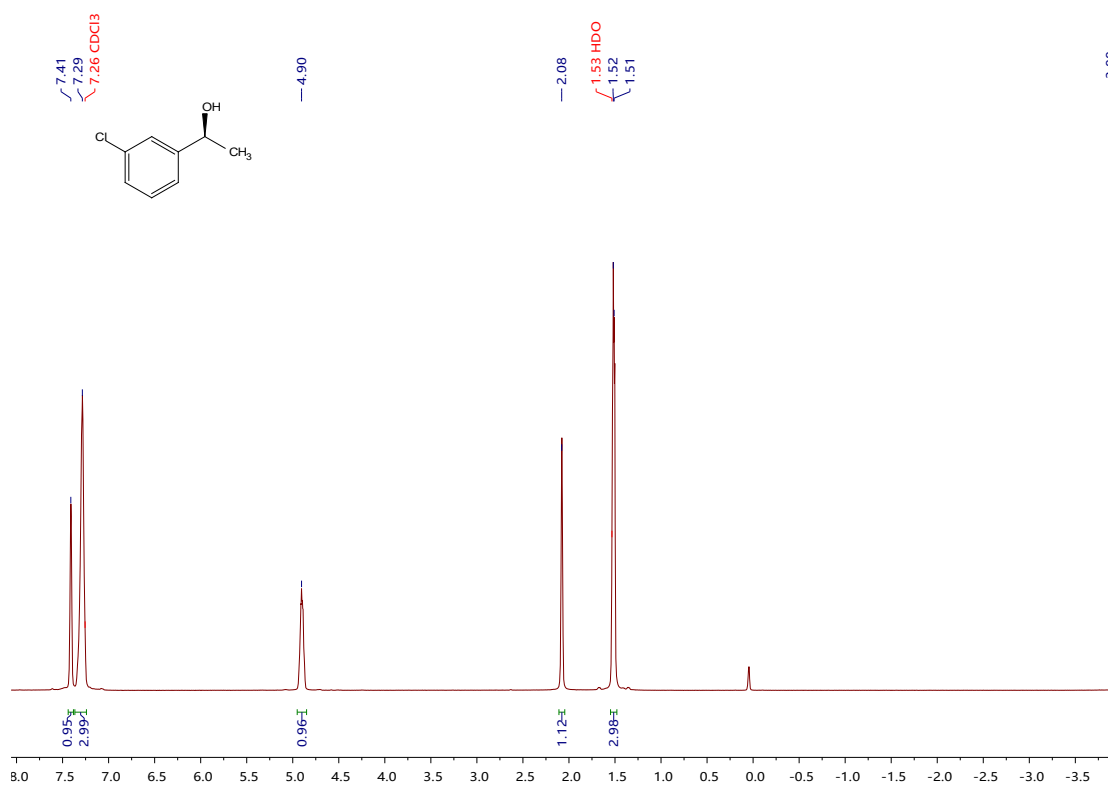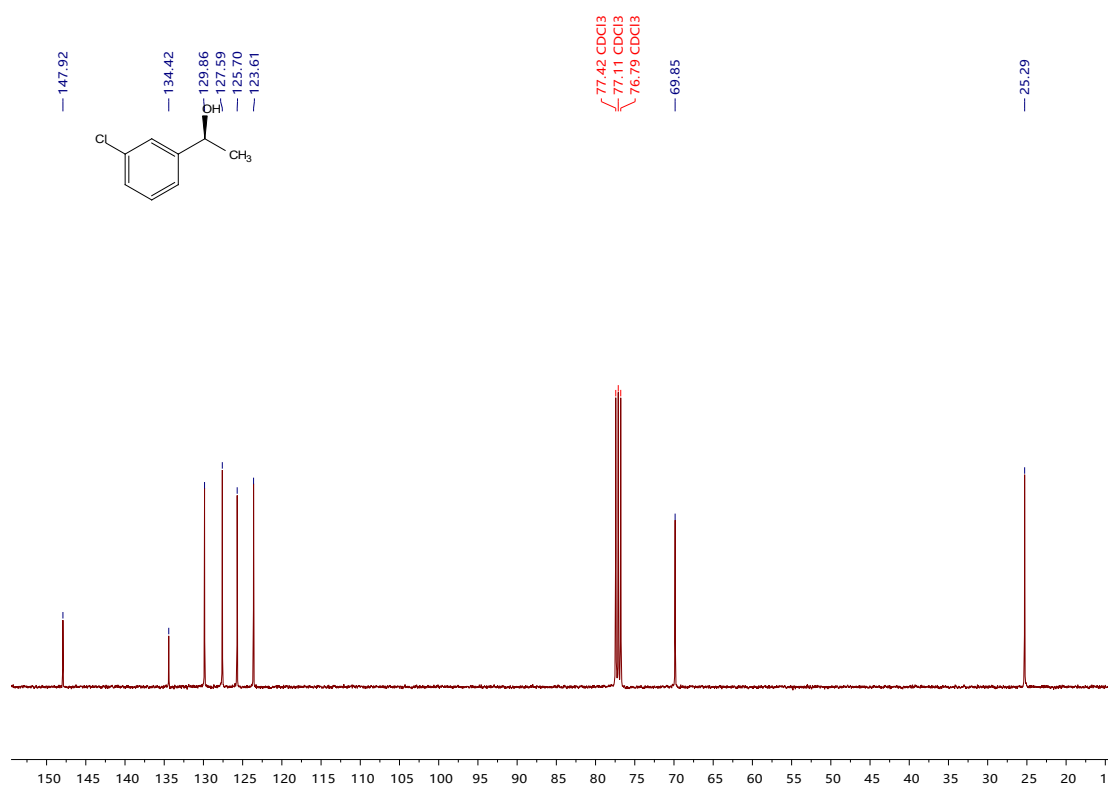



*(R)*-1-(2-bromophenyl)ethan-1-ol **15b**

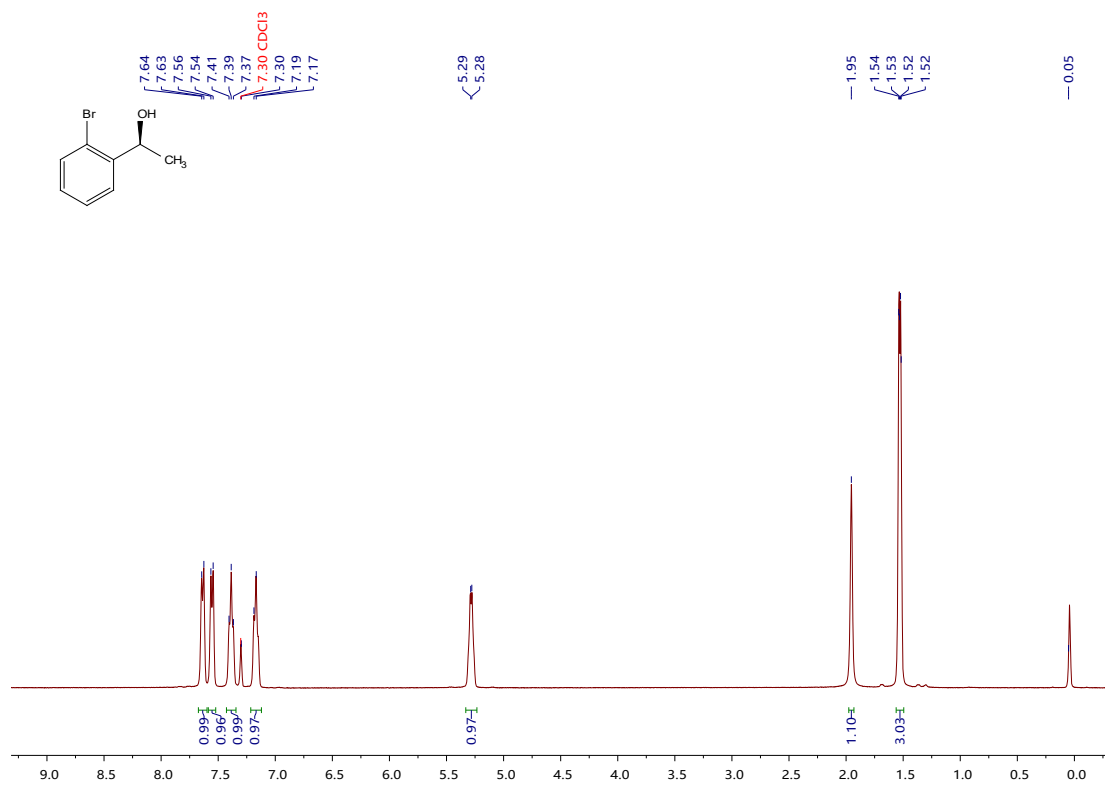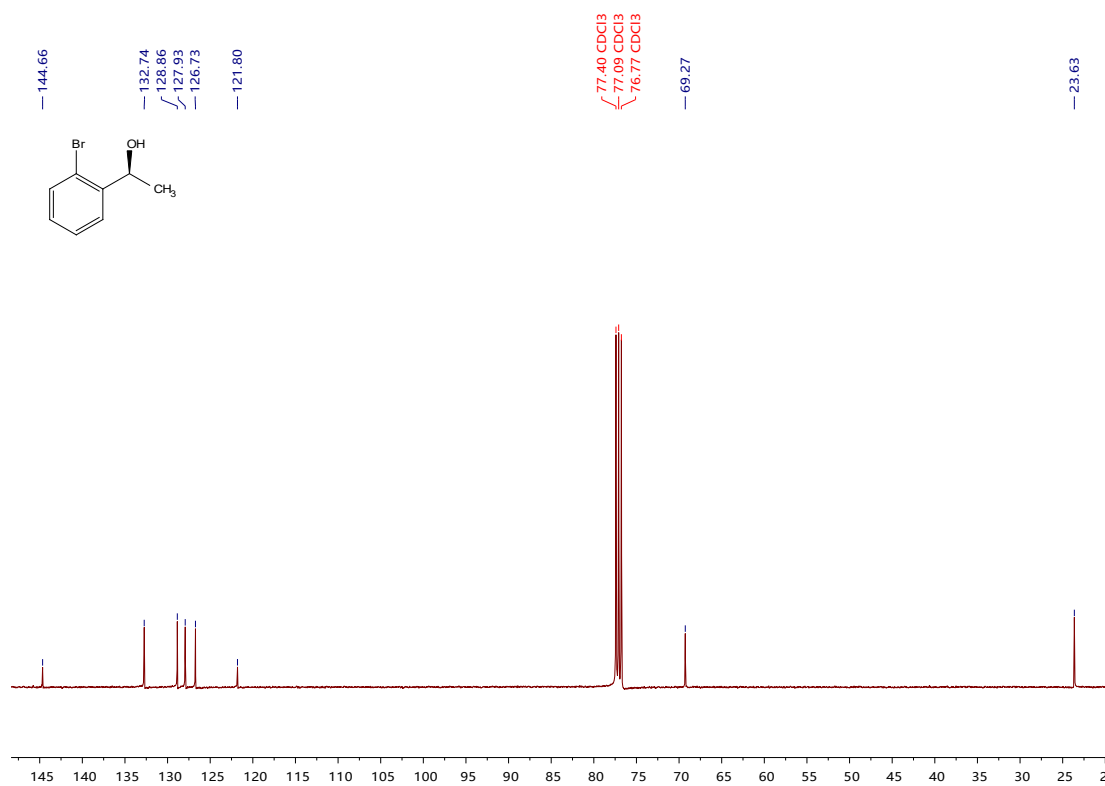

(S)-2-chloro-1-(3,4-difluorophenyl)-1-ethanol **16b**

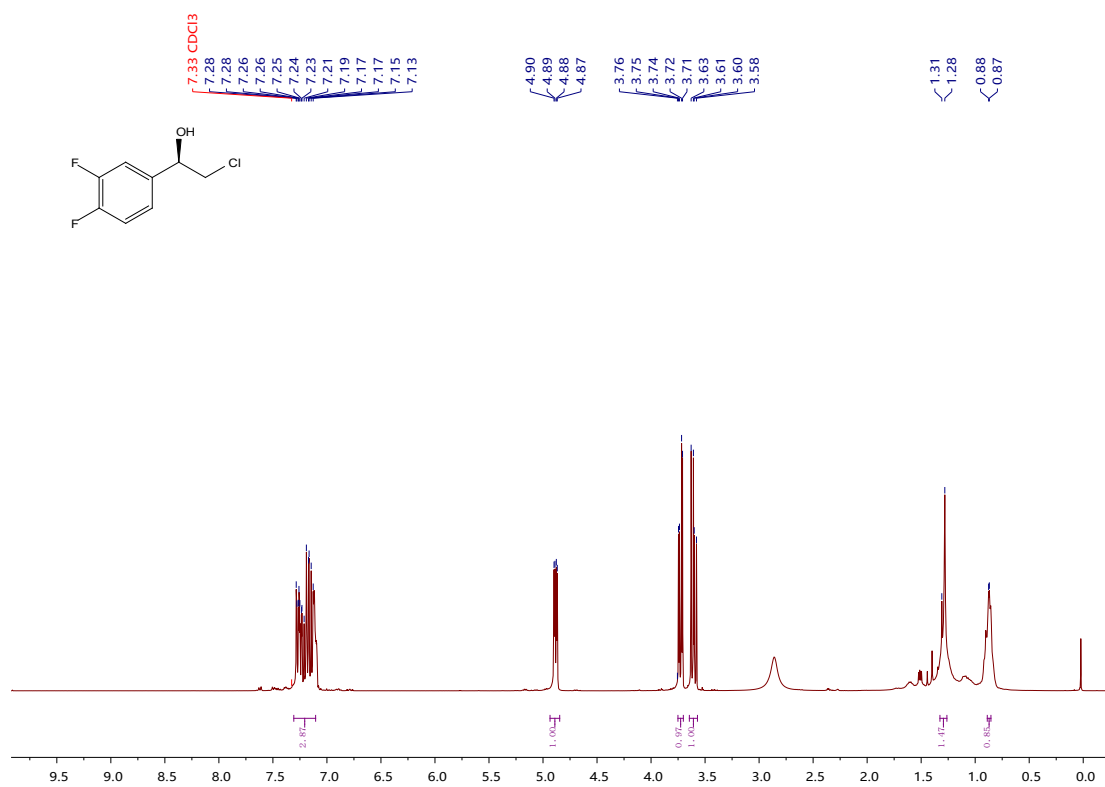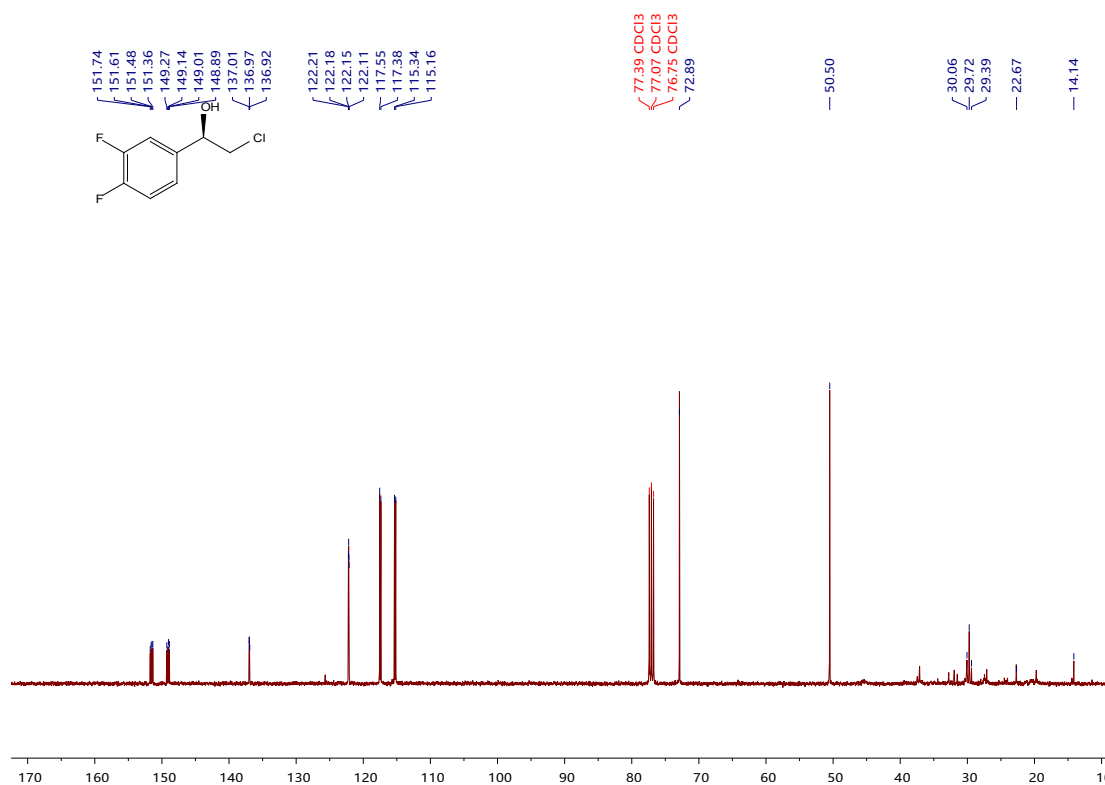

(S)-1-[4-(Trifluoromethyl)phenyl]ethan-1-ol **17b**

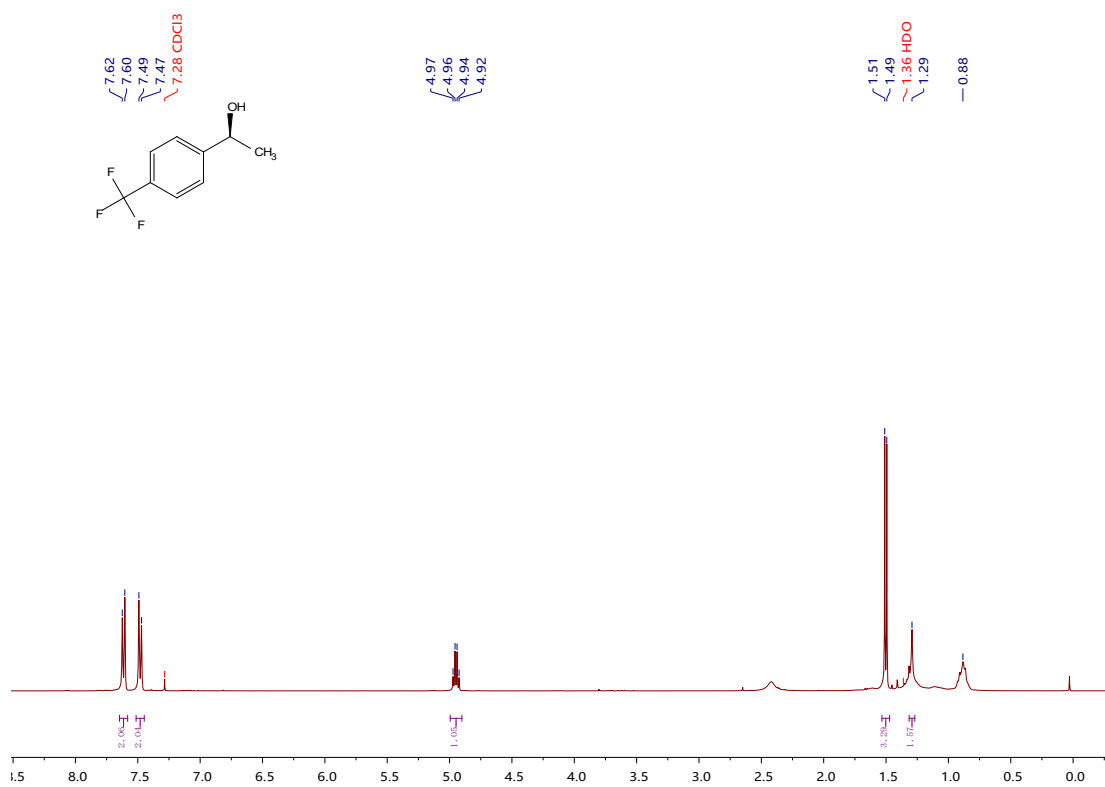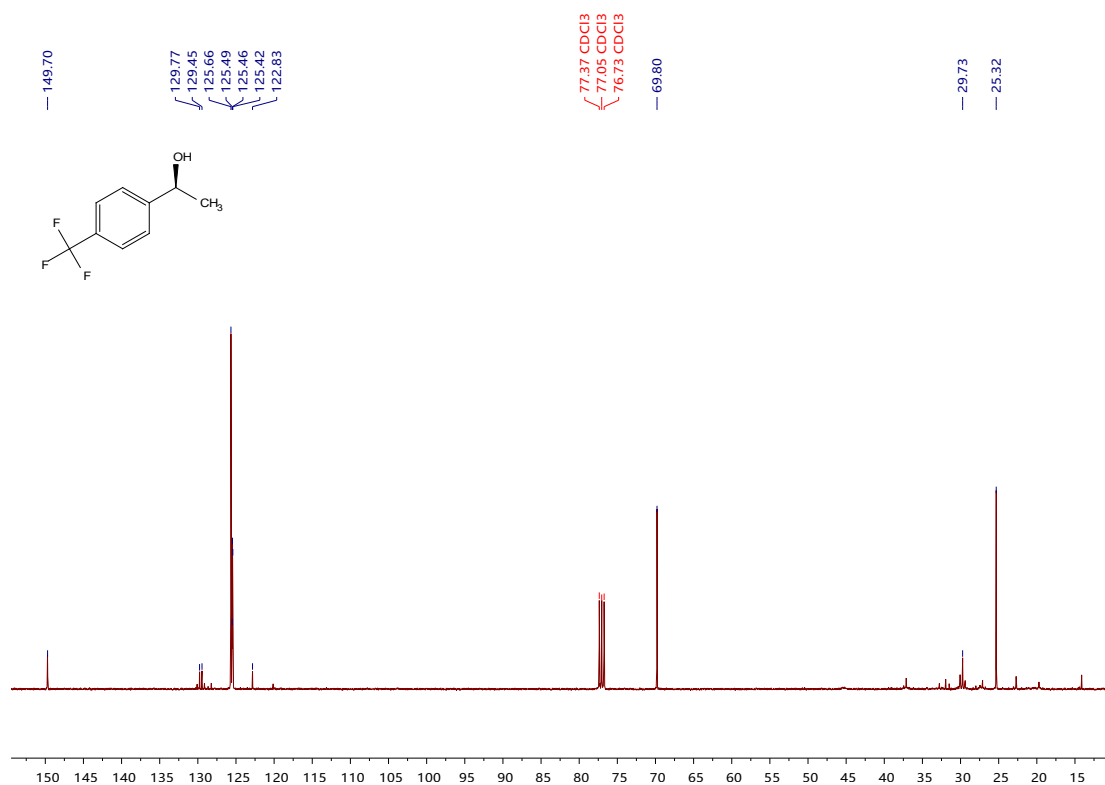

**(R)-1-(3-bromophenyl)ethan-1-ol 18b**

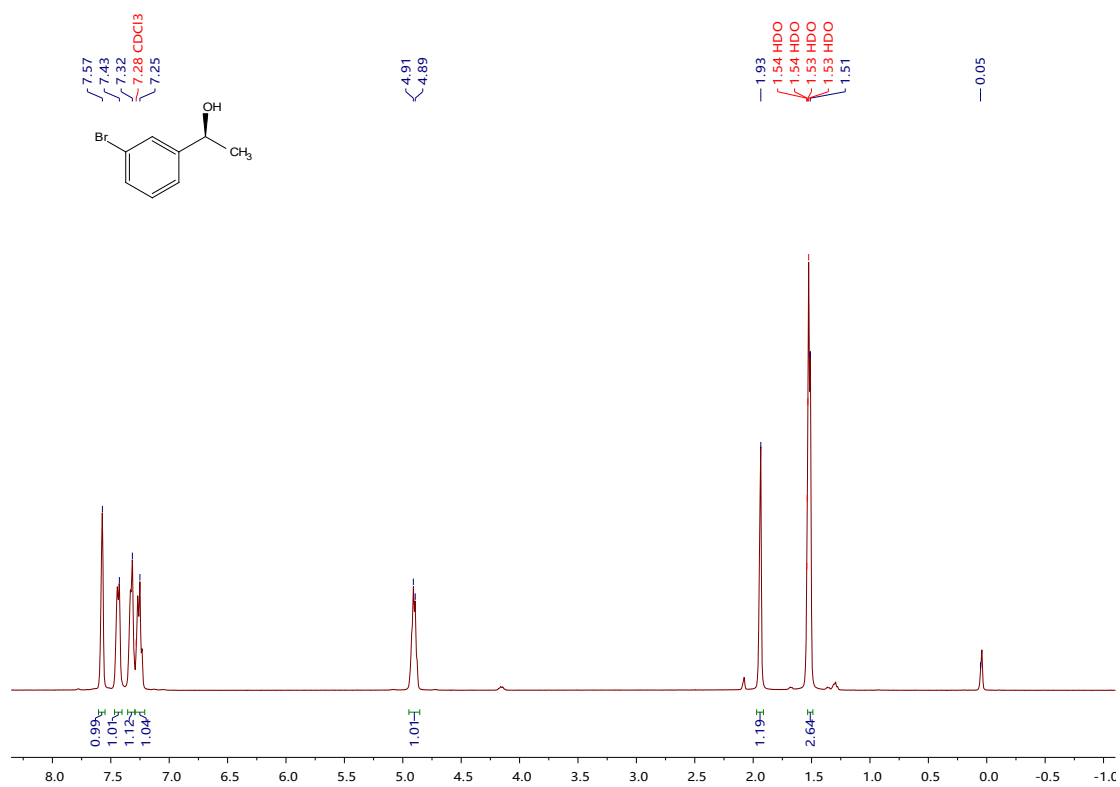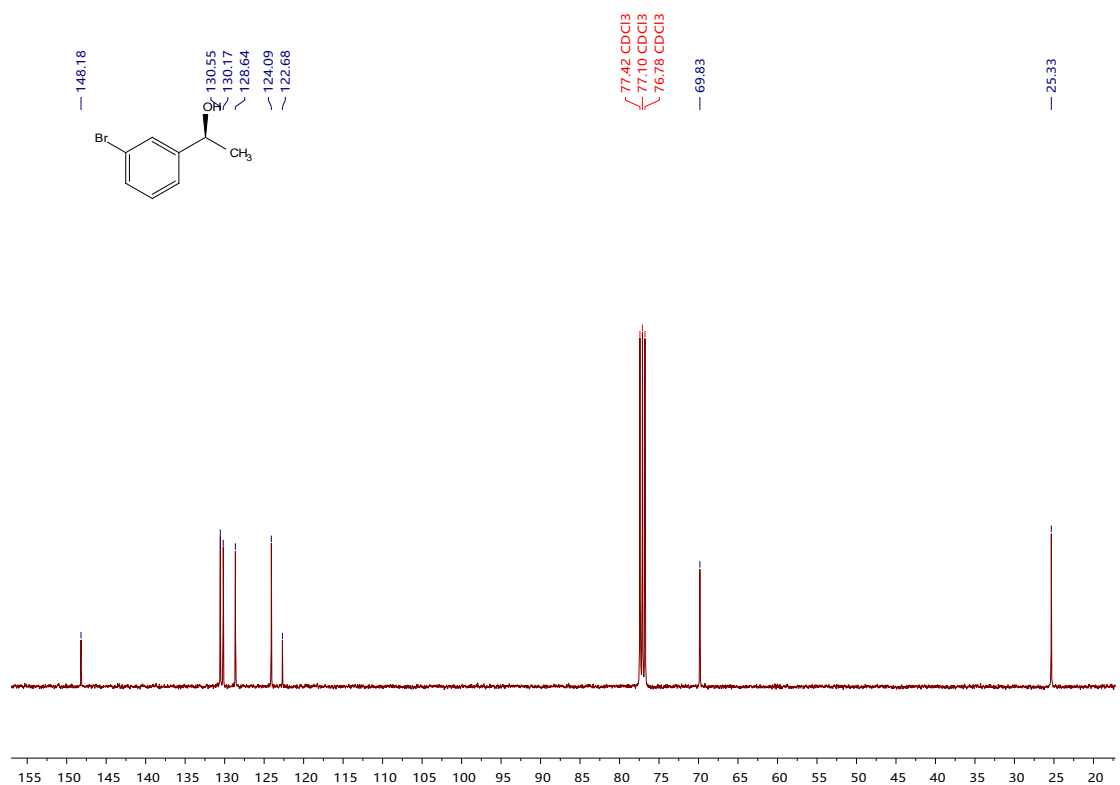

# (S)-2-chloro-1-(4-chlorophenyl)ethanol **19b**

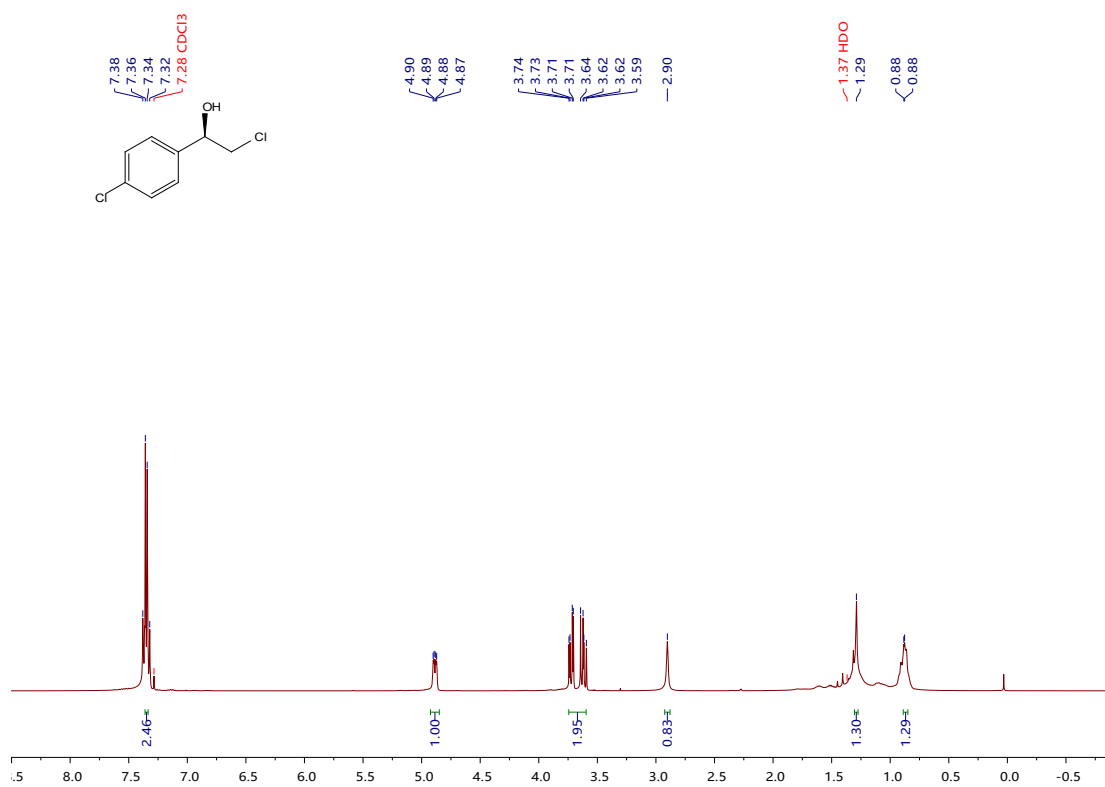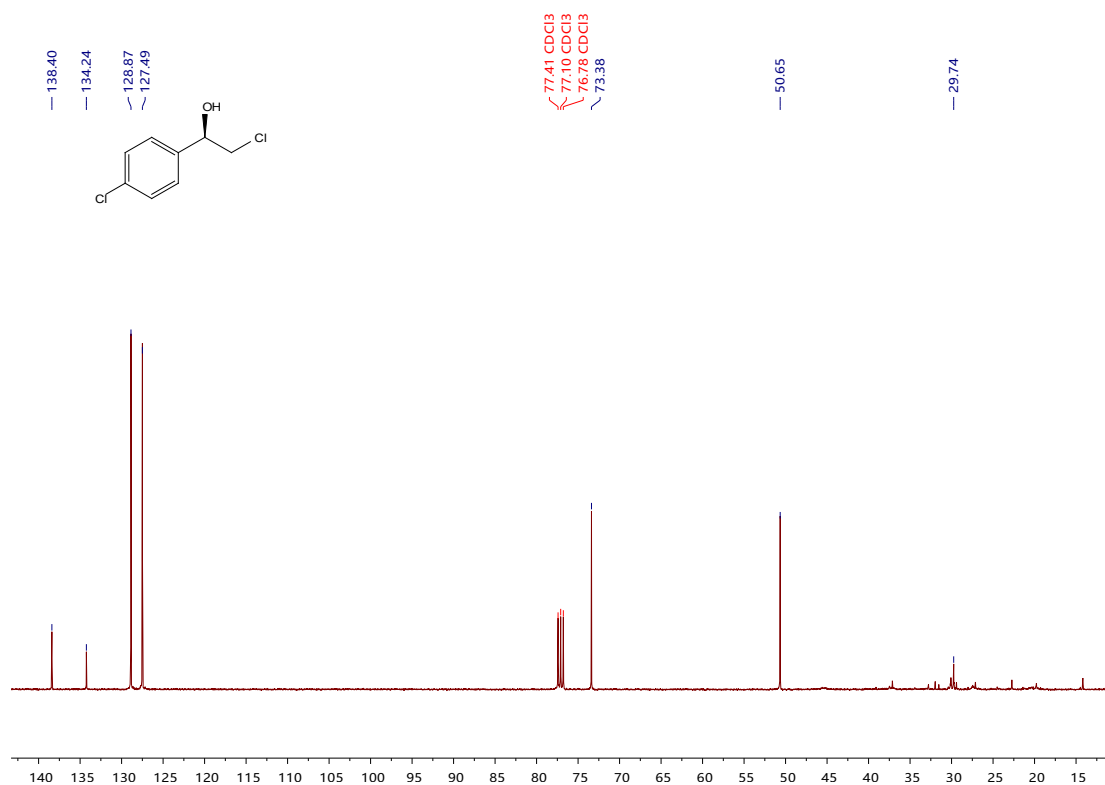

# (R)-1-(3-bromophenyl)propanol **20b**

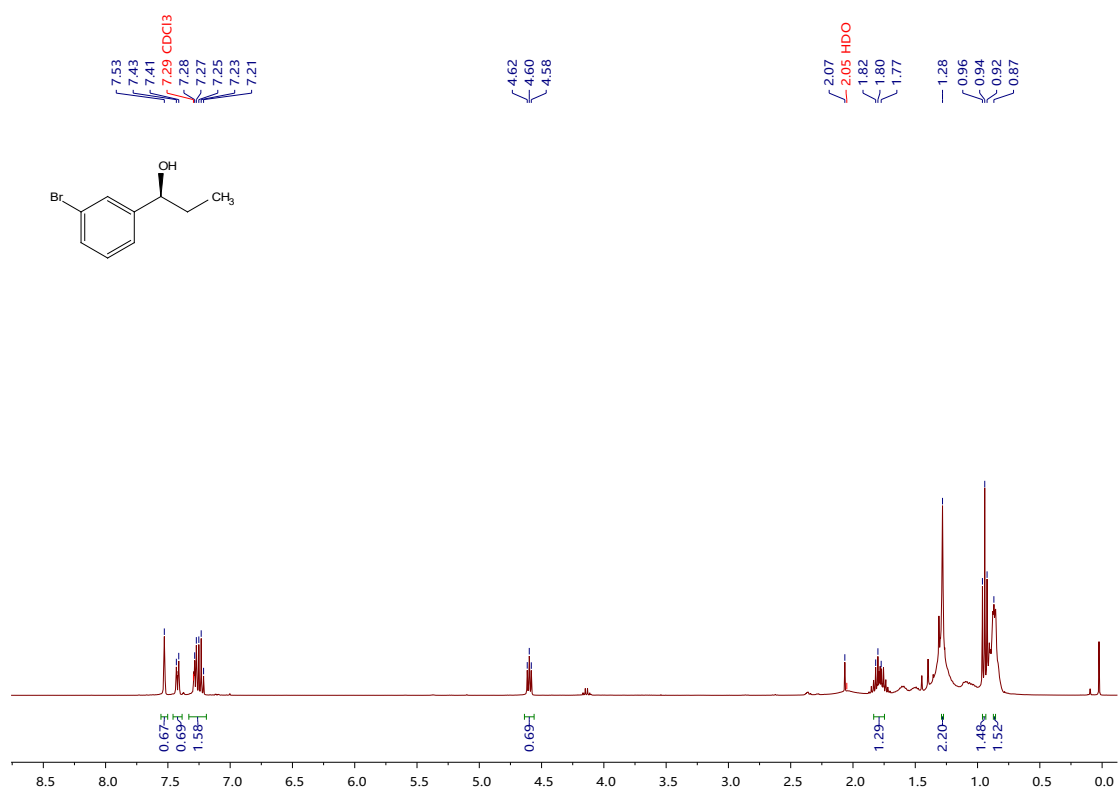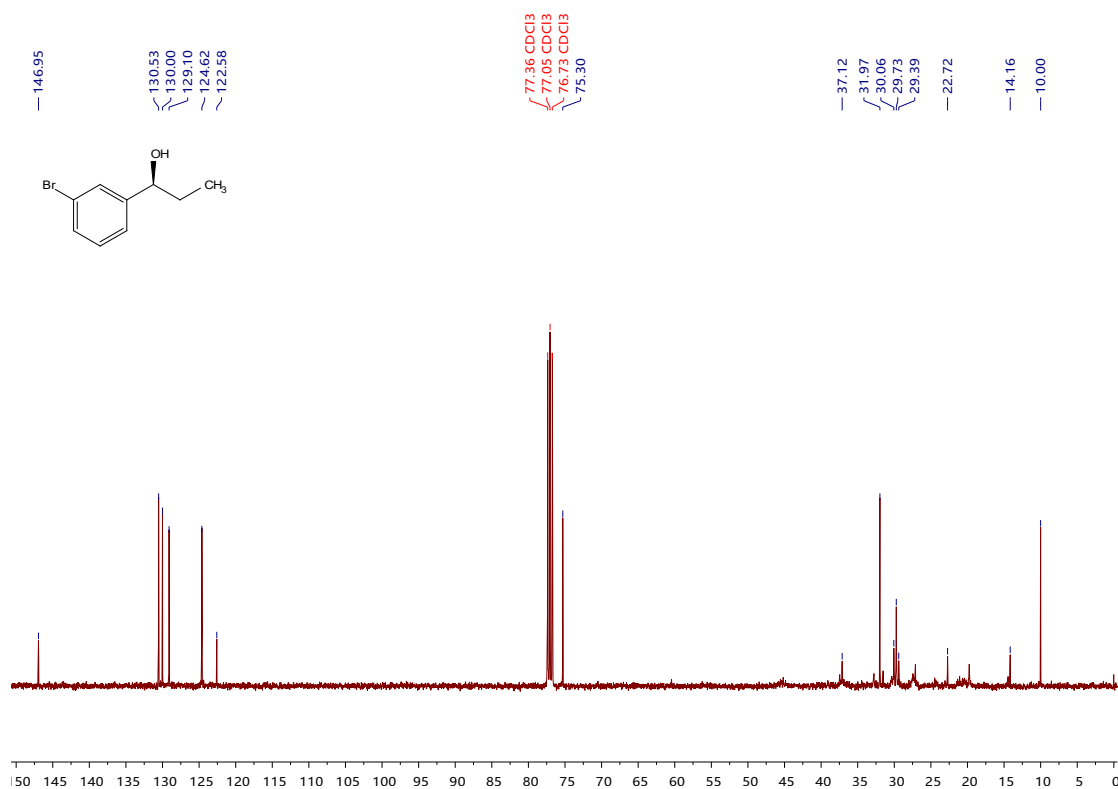

**(R)-1-(3,4-dichlorophenyl)ethan-1-ol 21b**

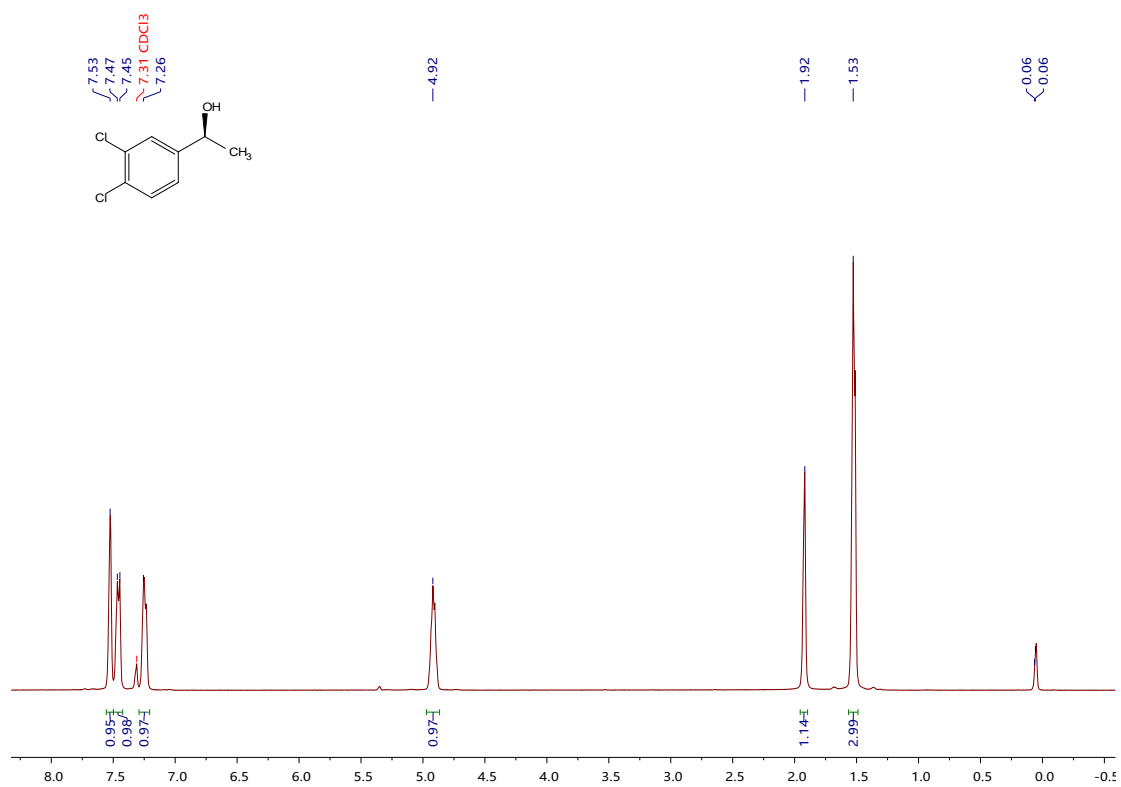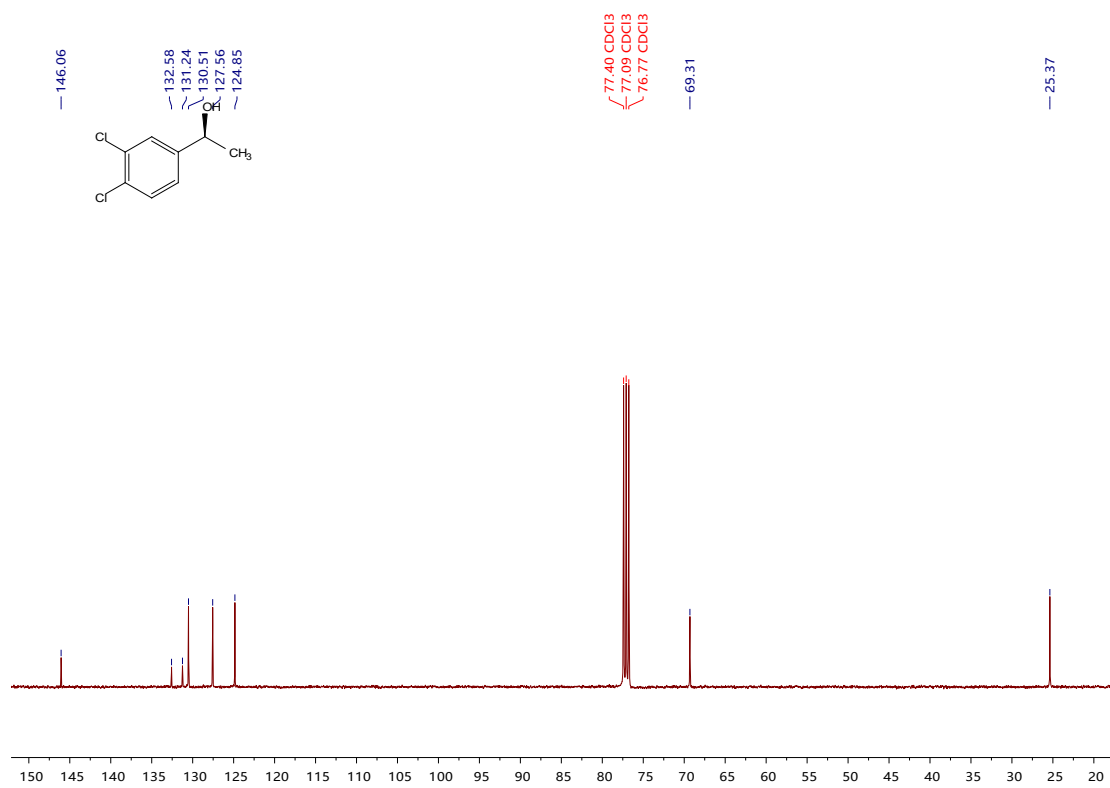

(S)-1-(4-bromophenyl)-2-chloroethanol **22b**

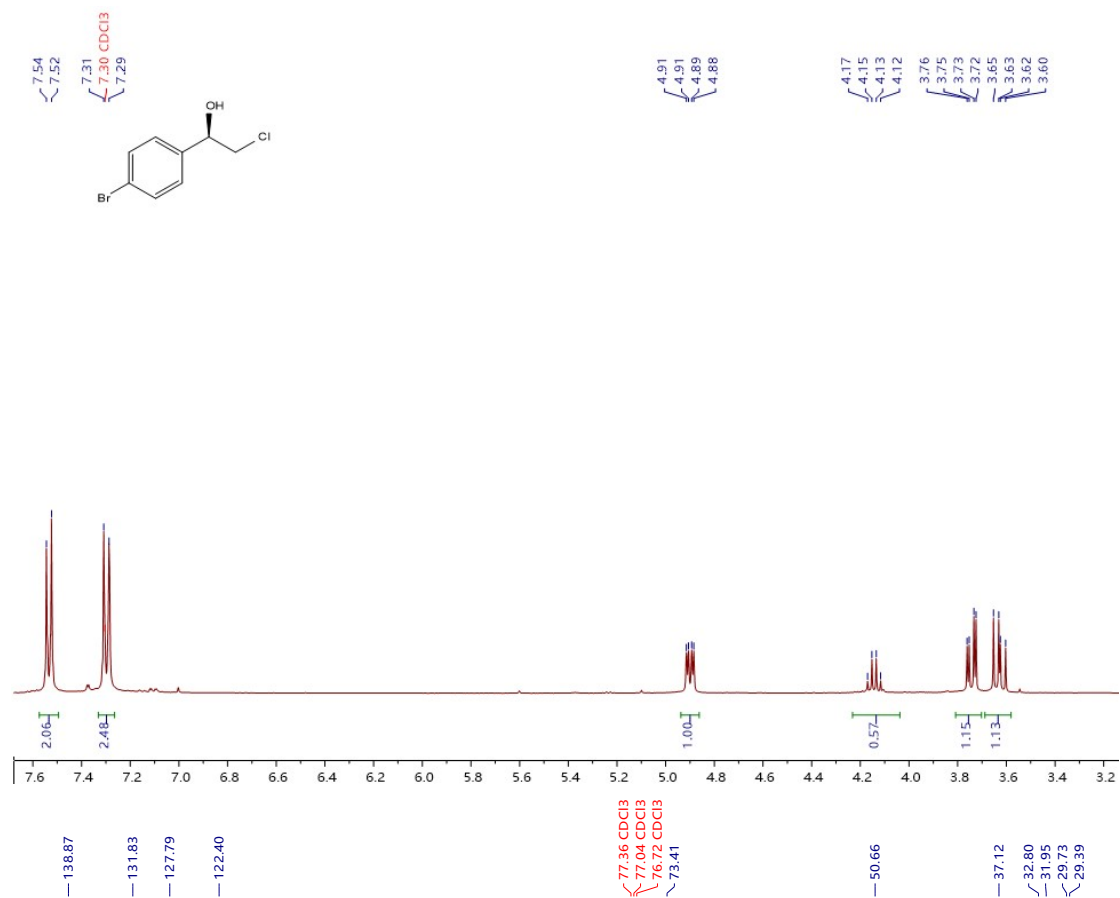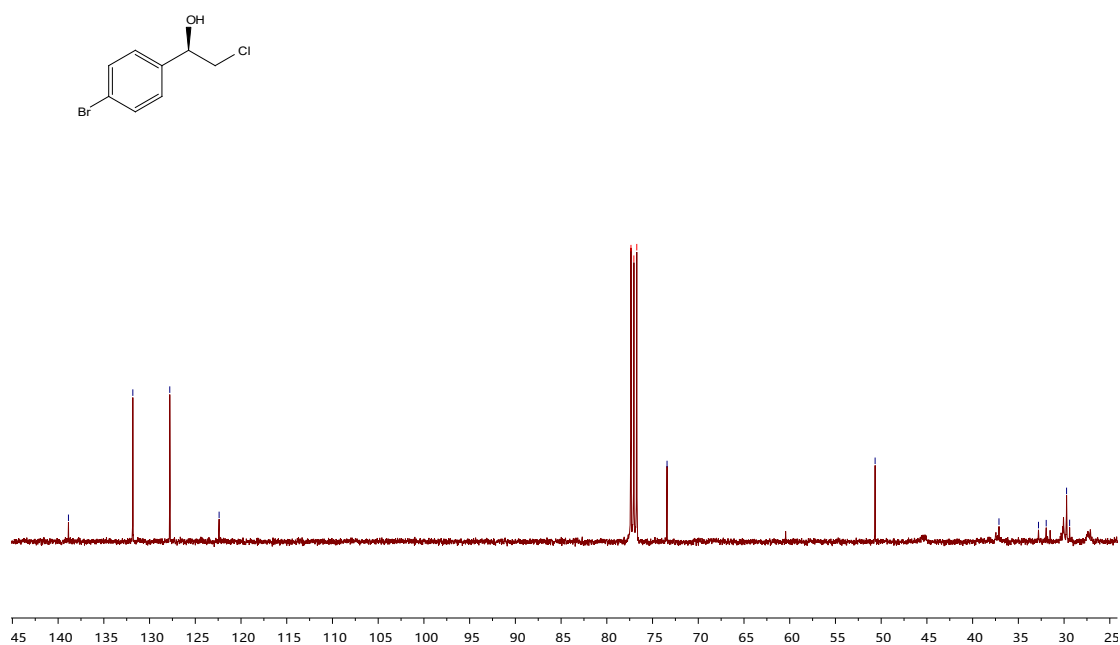



**(R)-2-chloro-1-(2,4-dichlorophenyl)ethan-1-ol 23b**

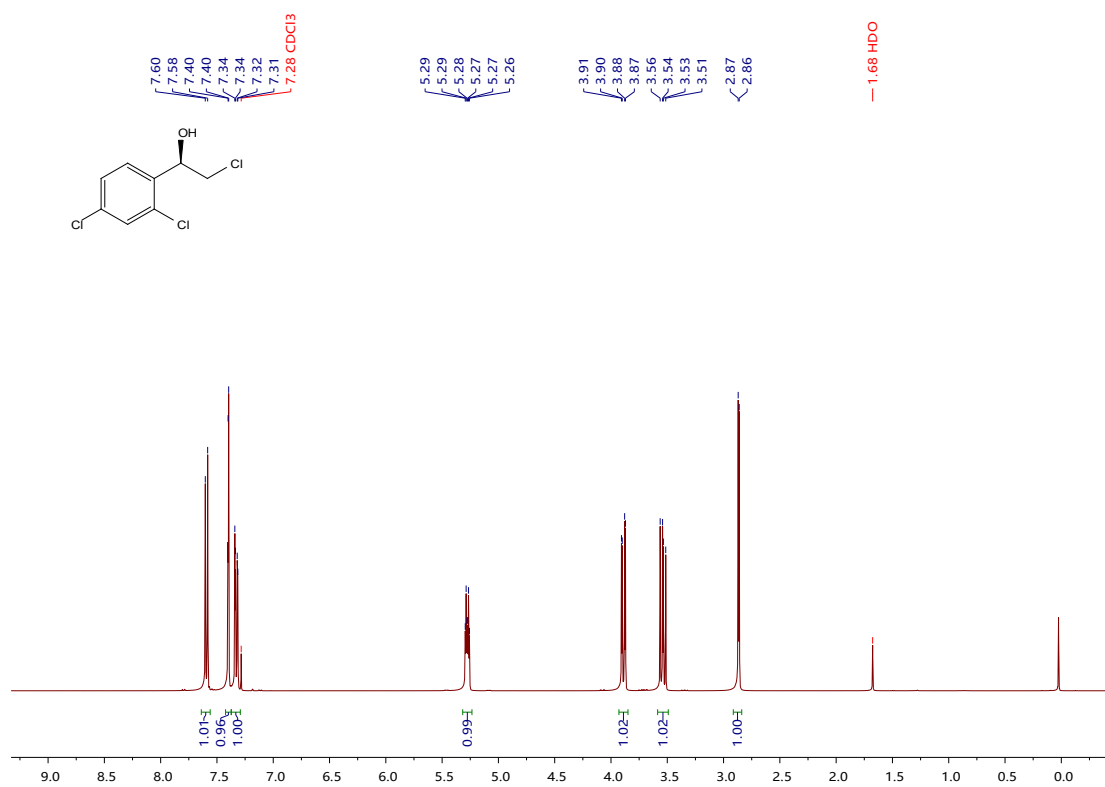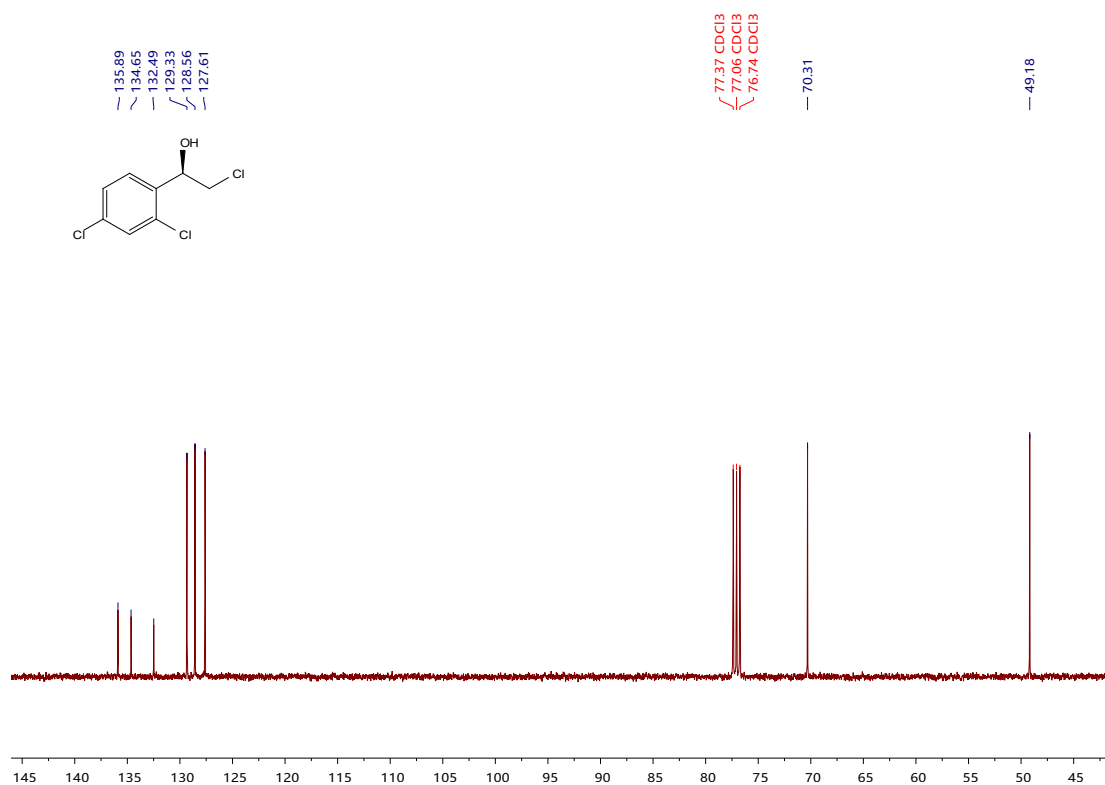

(S)-2-chloro-1-(3,4-dichlorophenyl)ethan-1-ol **24b**

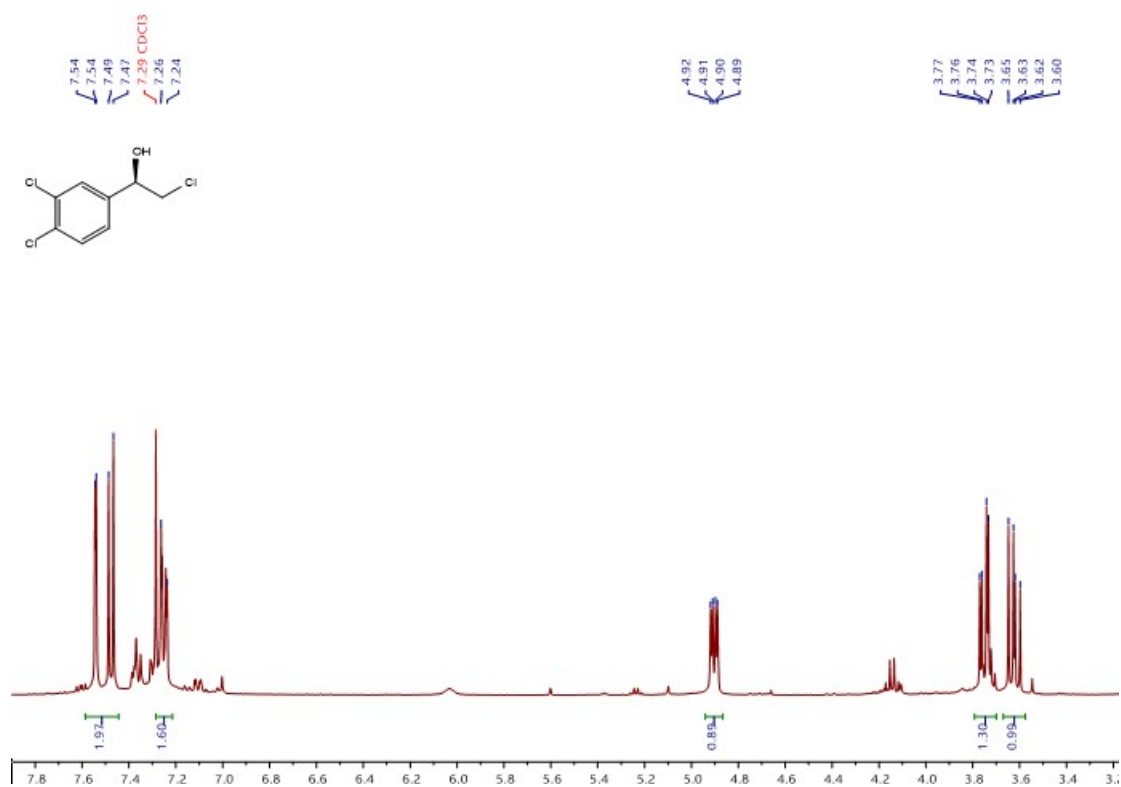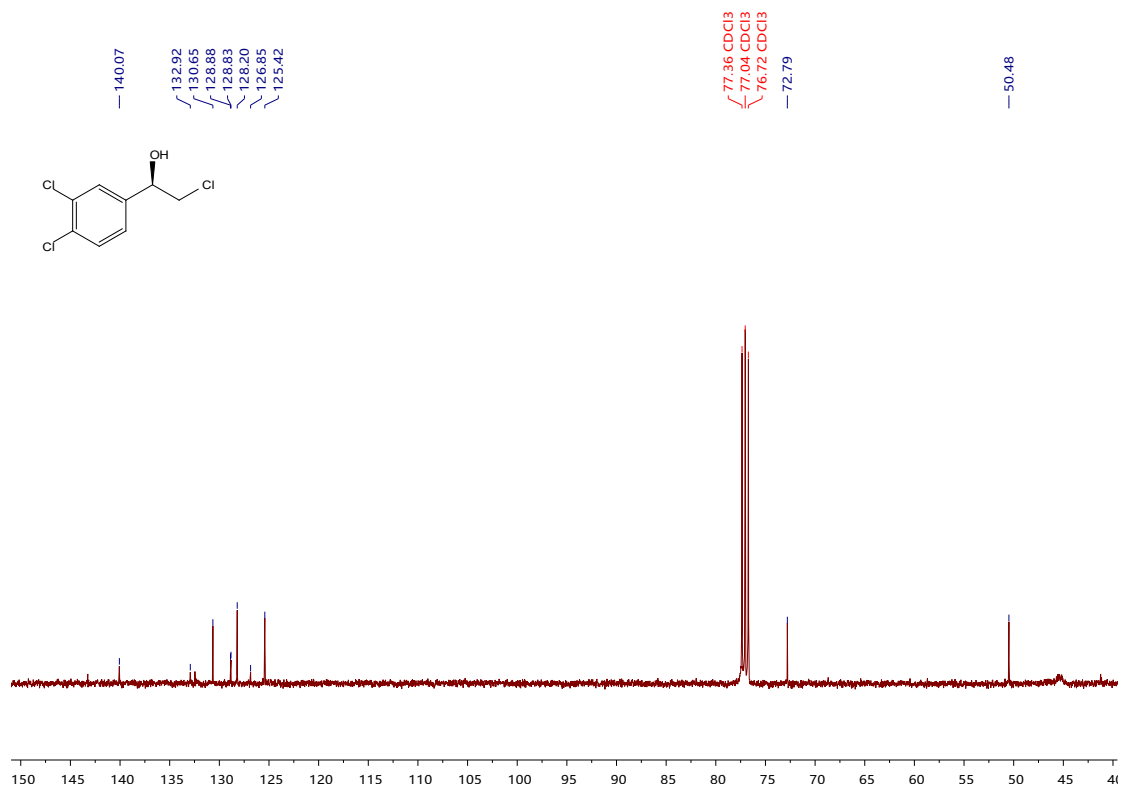

(S)-1-[3,5-bis(trifluoromethyl)phenyl]ethanol **25b**

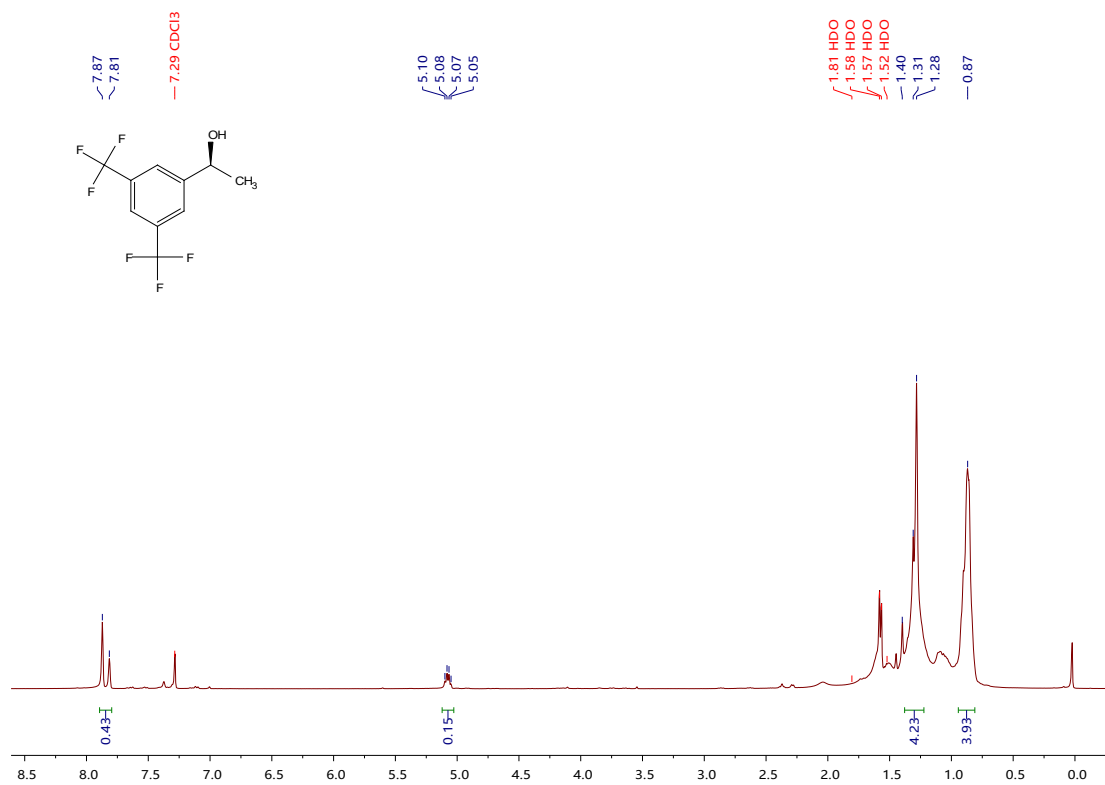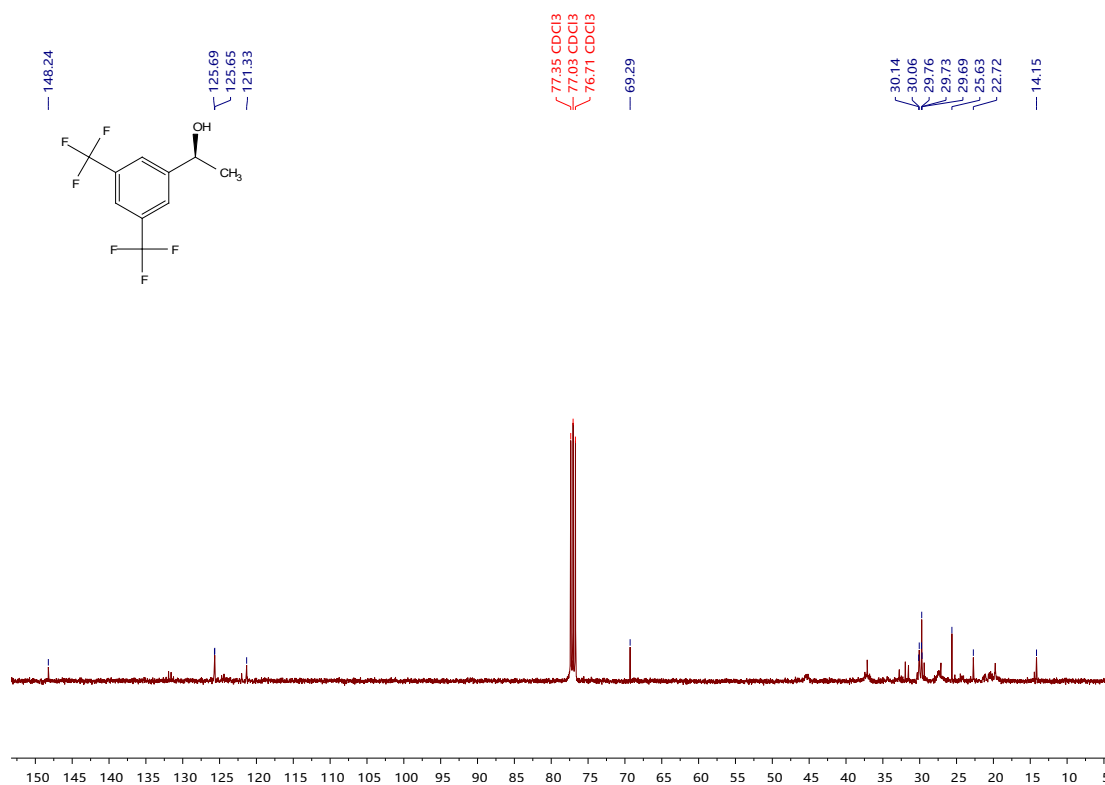

## GC traces for productions

(*S*)-1-(2-fluorophenyl)ethan-1-ol **1b**

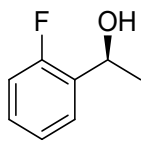

uV

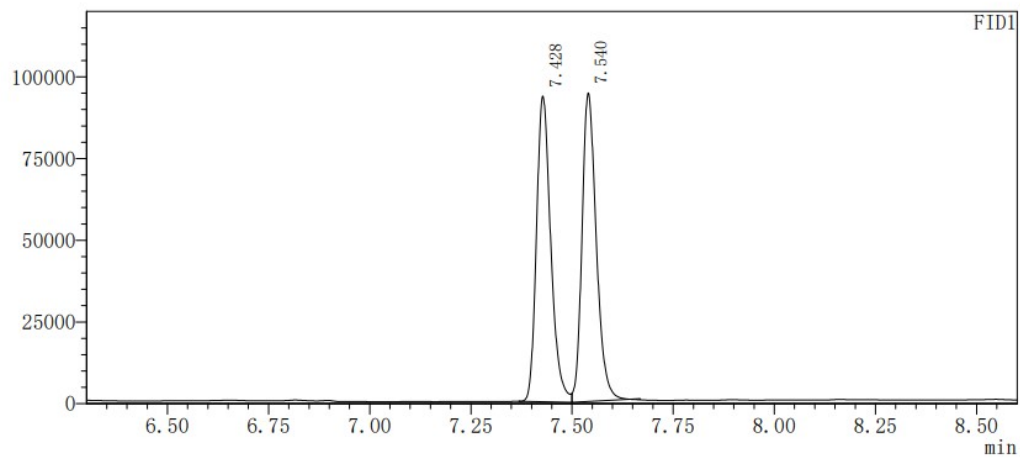

uV

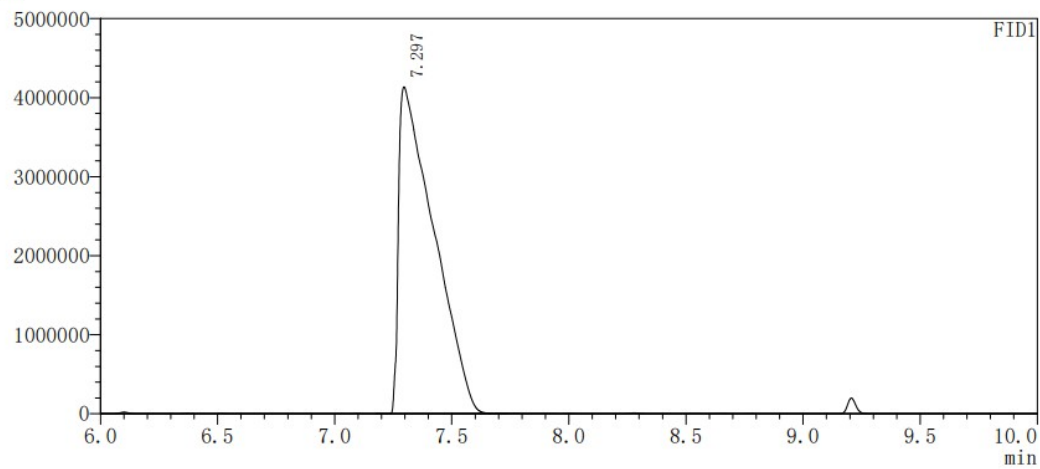

(S)-1-(4-fluorophenyl)ethan-1-ol **2b**

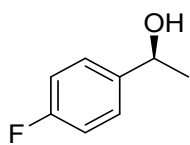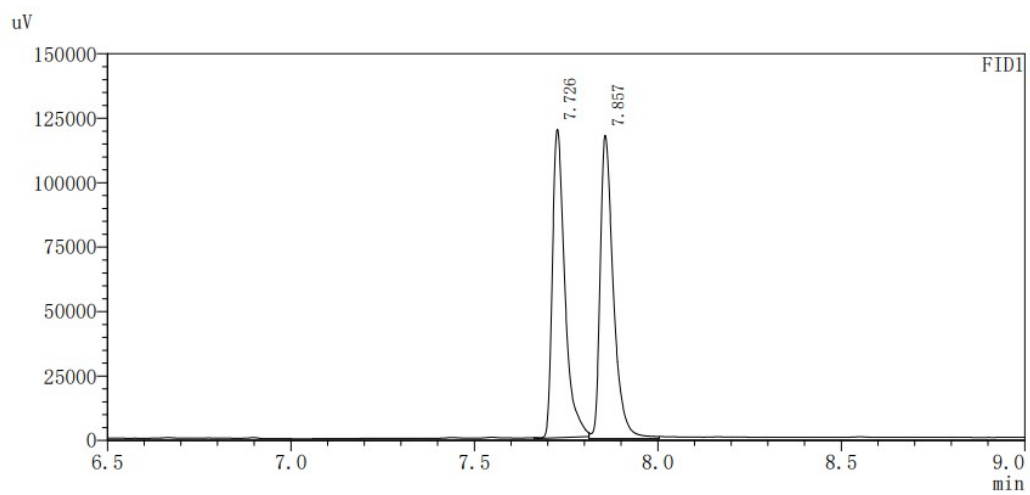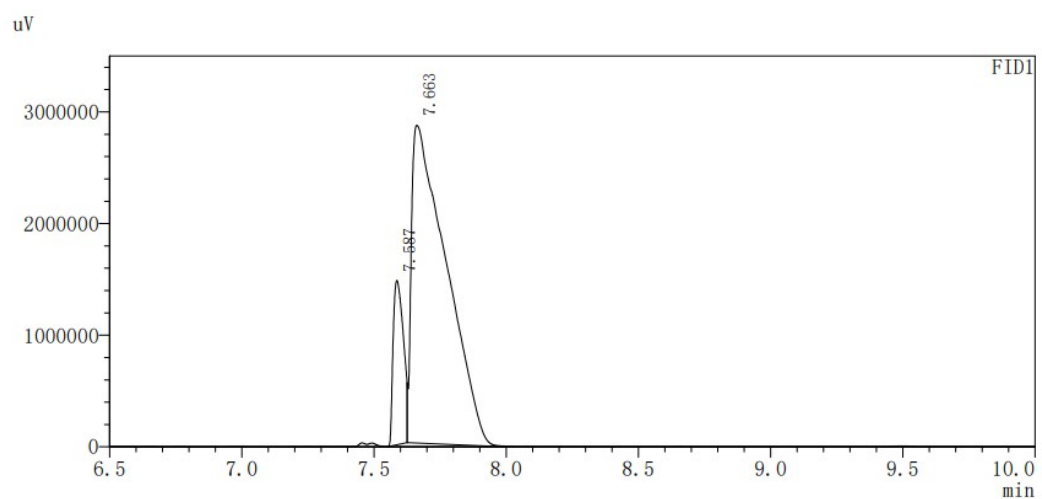

(S)-1-(3-fluorophenyl)ethan-1-ol **3b**

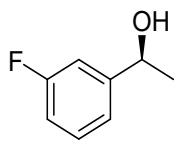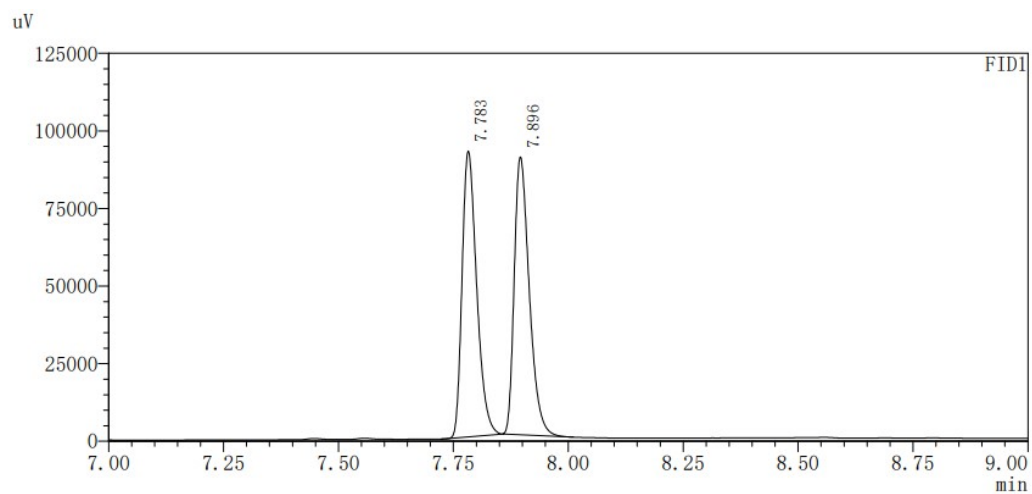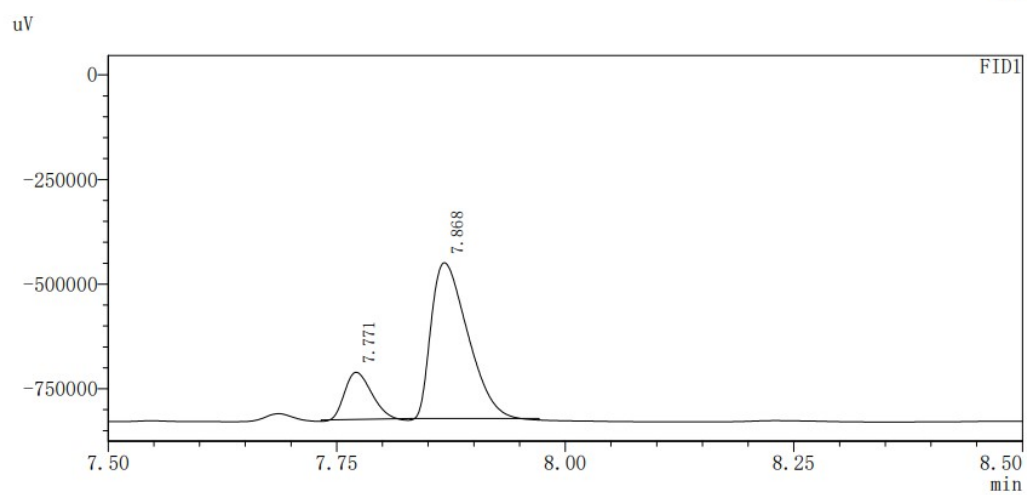

*(R)*-1-(2,4-difluorophenyl)ethanol **4b**

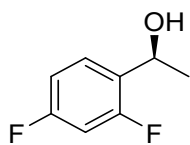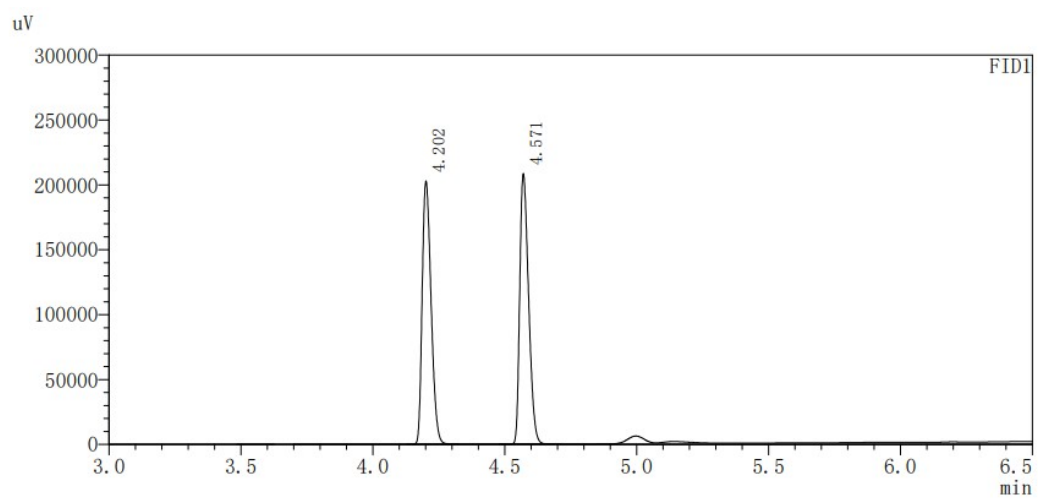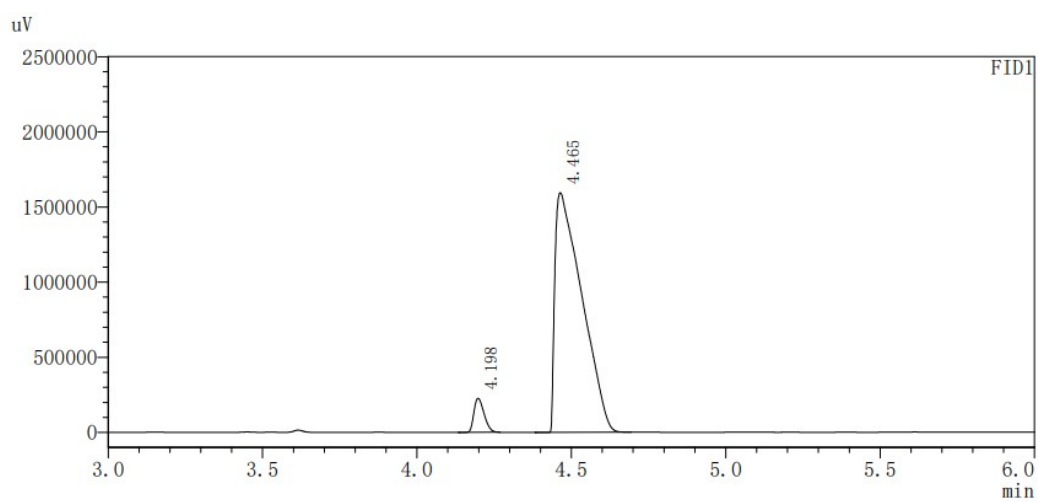

*(R)*-1-(3,4-difluorophenyl)ethan-1-ol **5b**

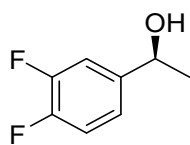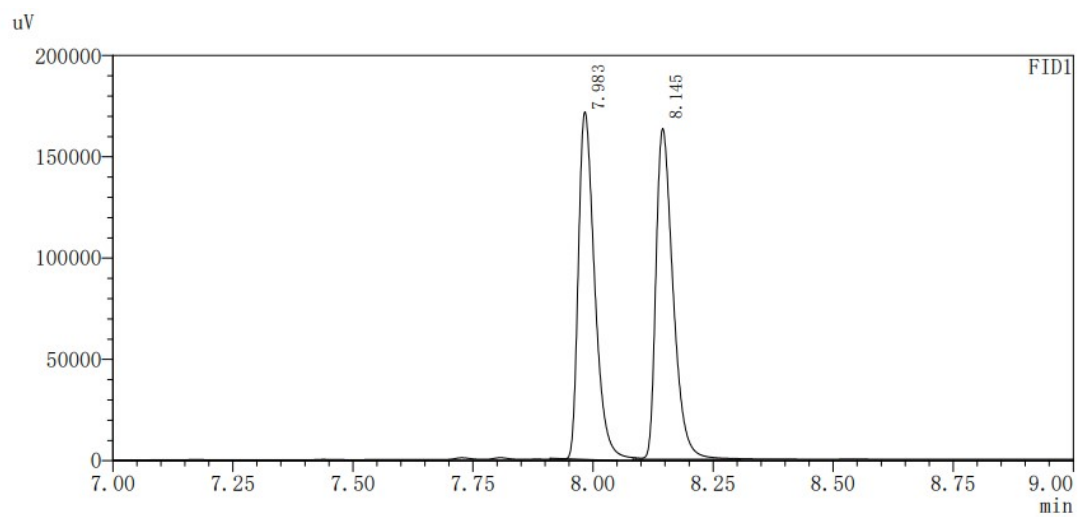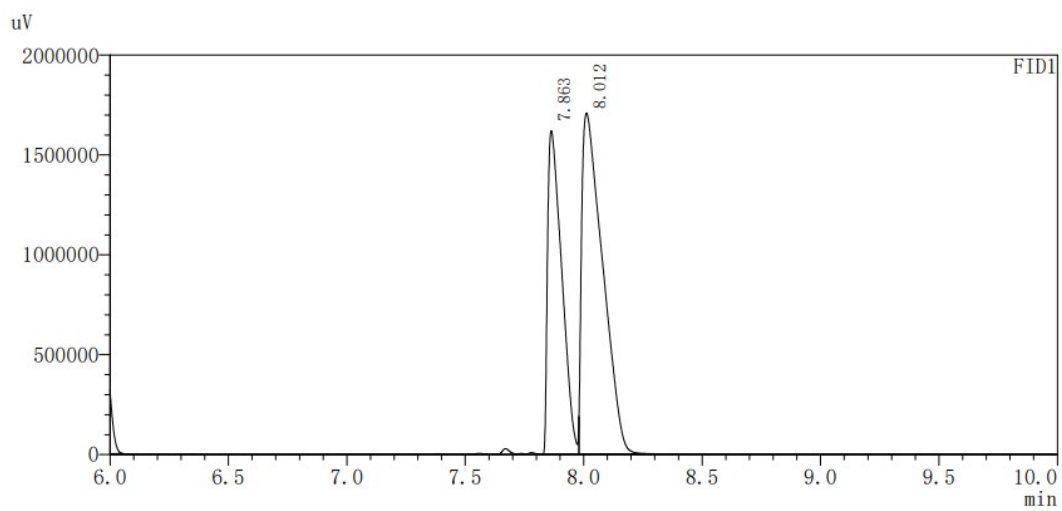



(S)-1-(2-chlorophenyl)ethan-1-ol **6b**

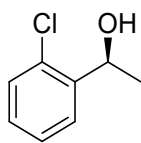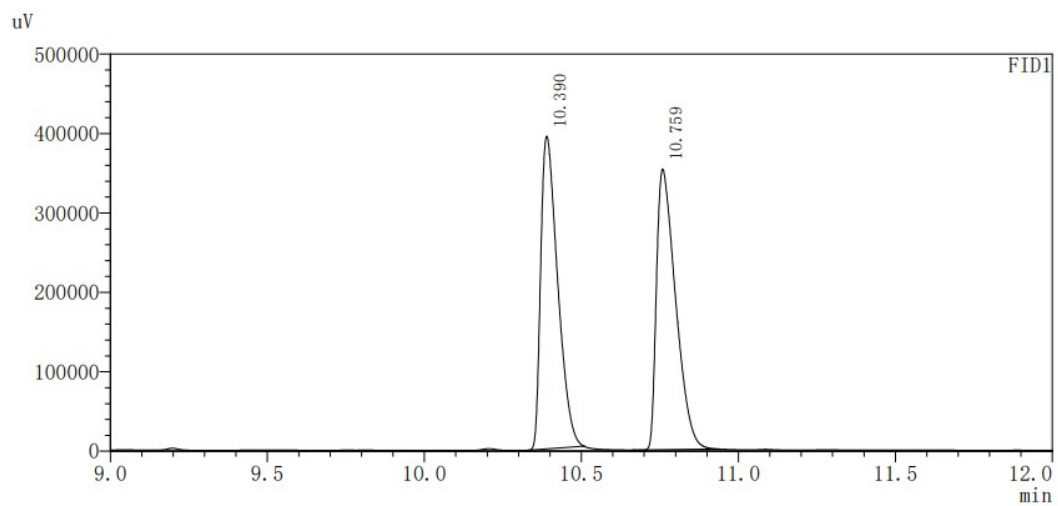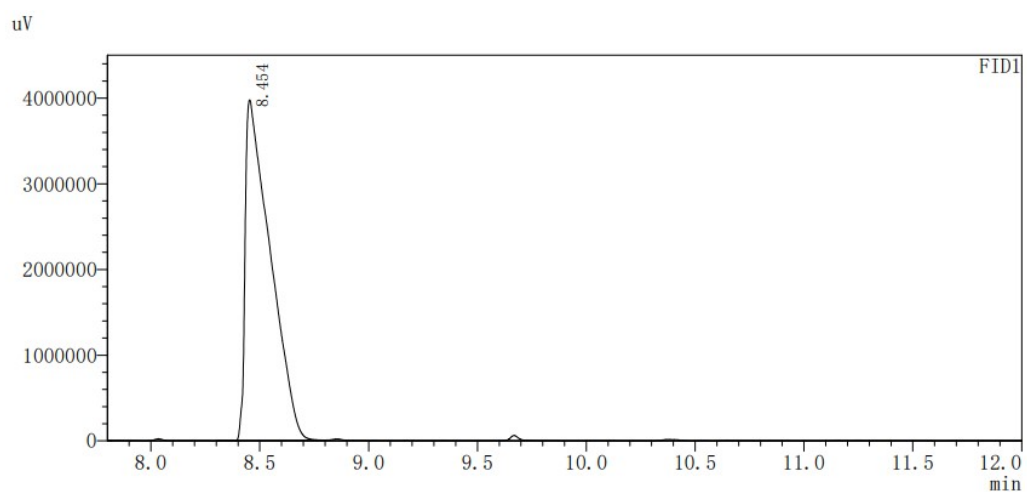

(*S*)-3-chloro-1-phenyl-1-propanol **7b**

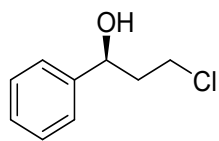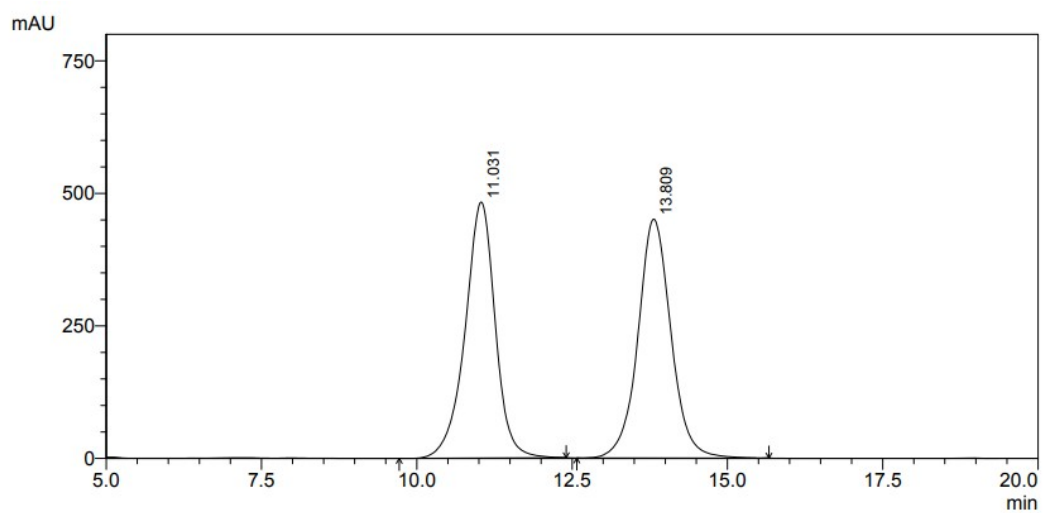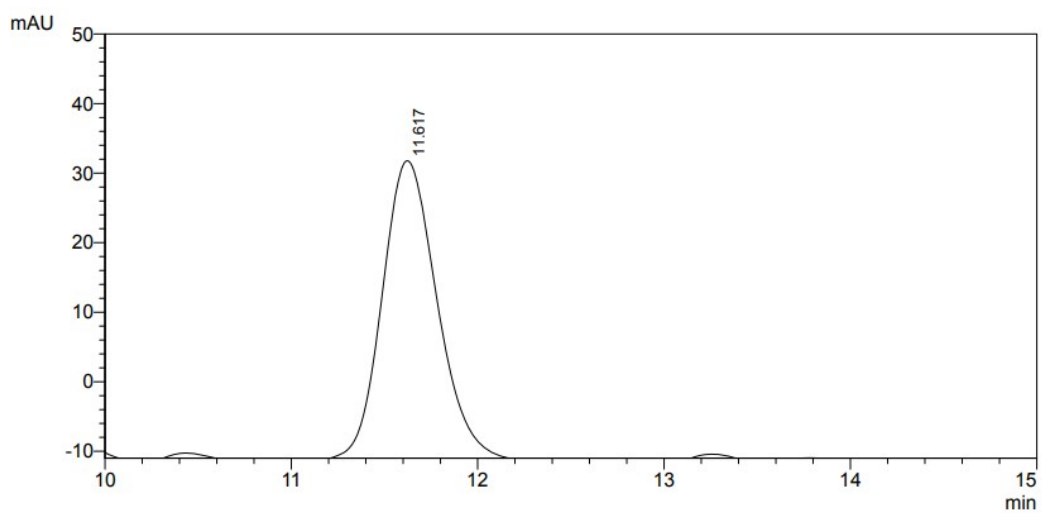

(S)-1-(4-chlorophenyl)ethan-1-ol **8b**

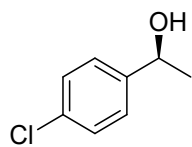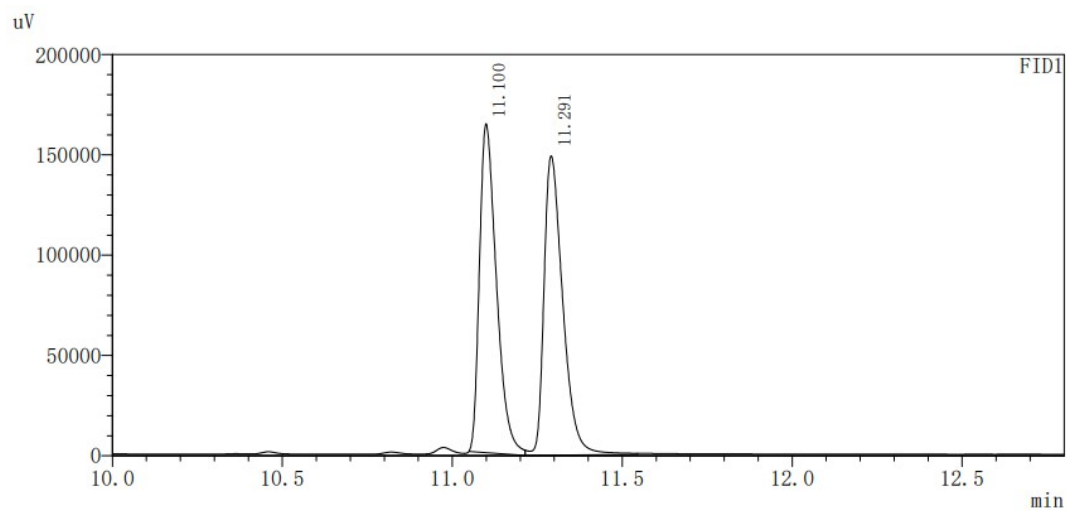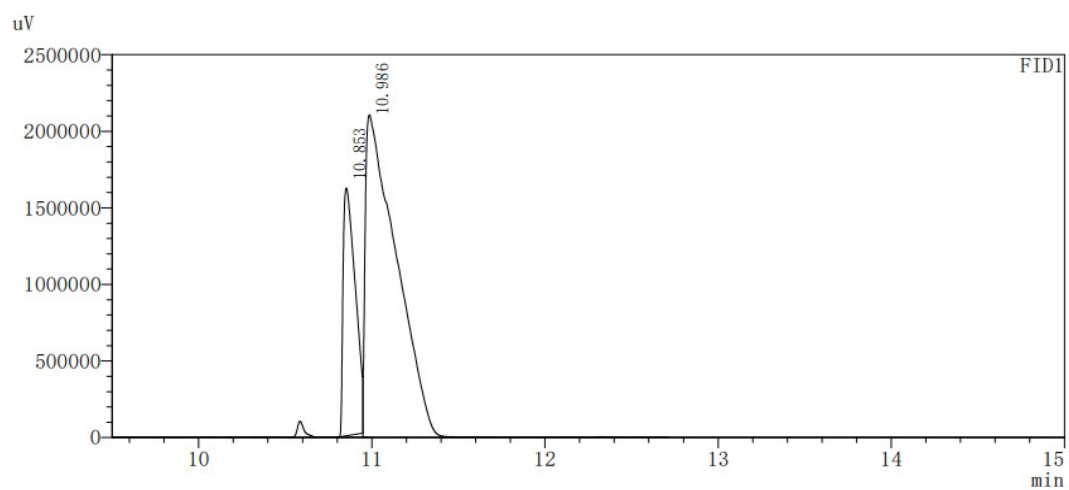

*(R)*-2-chloro-1-phenylethanol **9b**

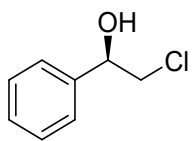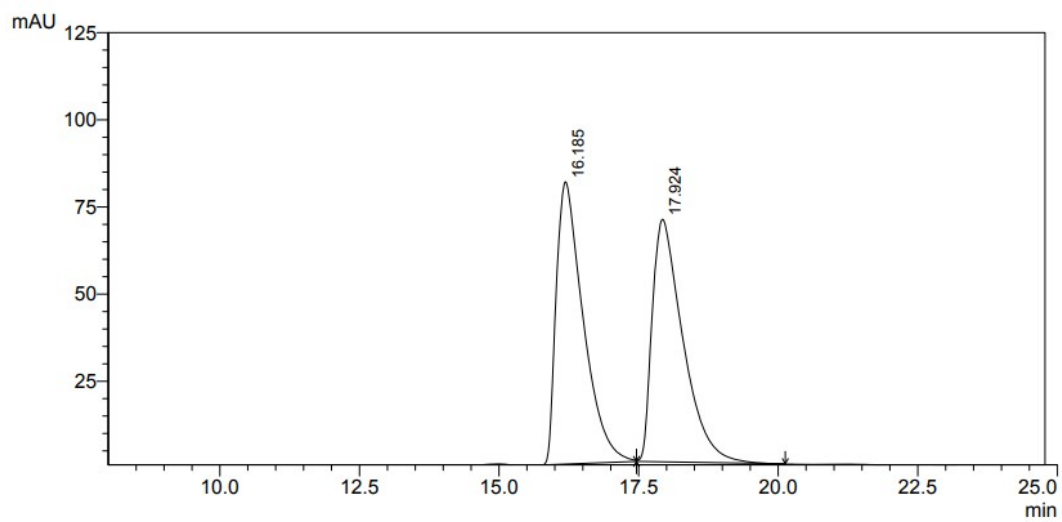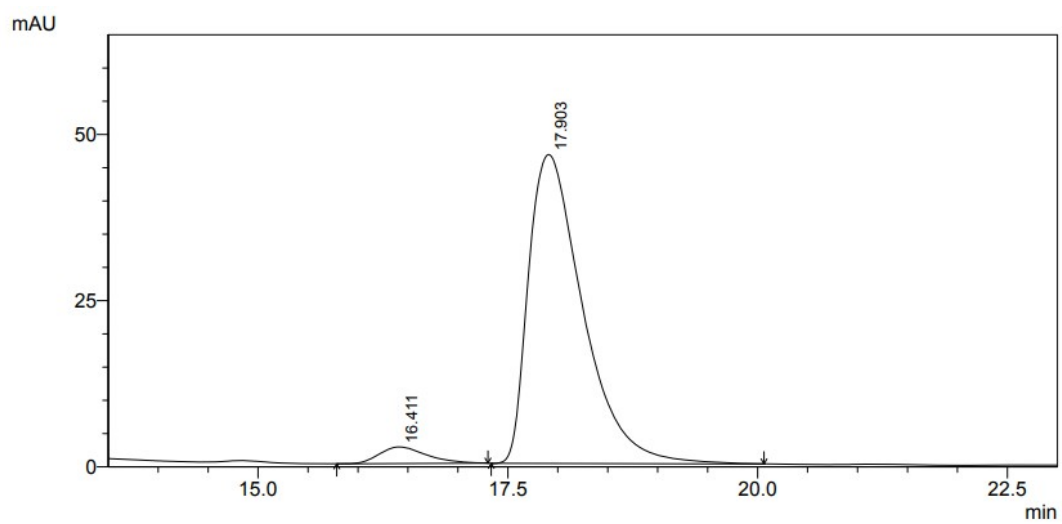

*(R)*-2-chloro-1-(4-fluorophenyl)ethanol **10b**

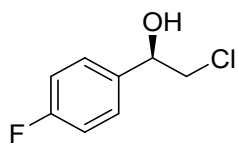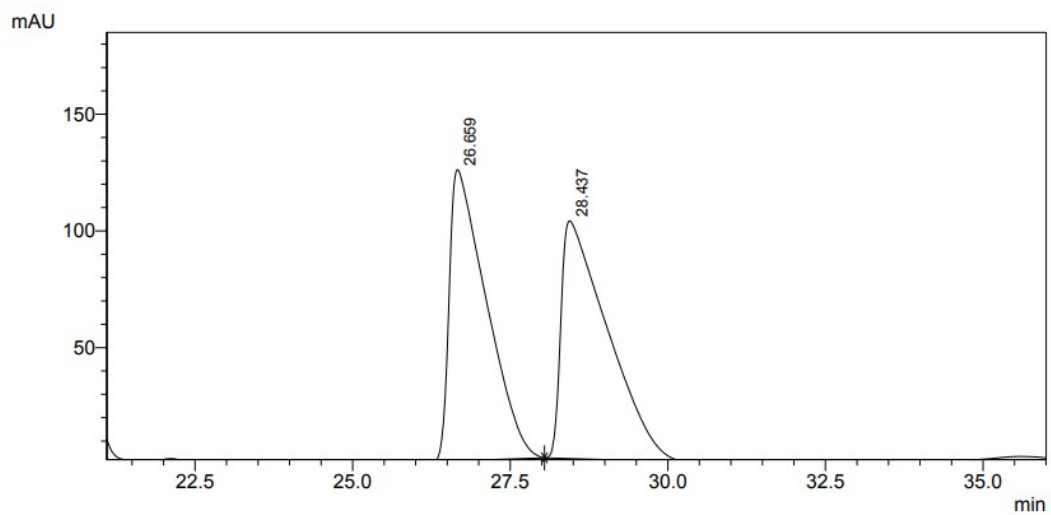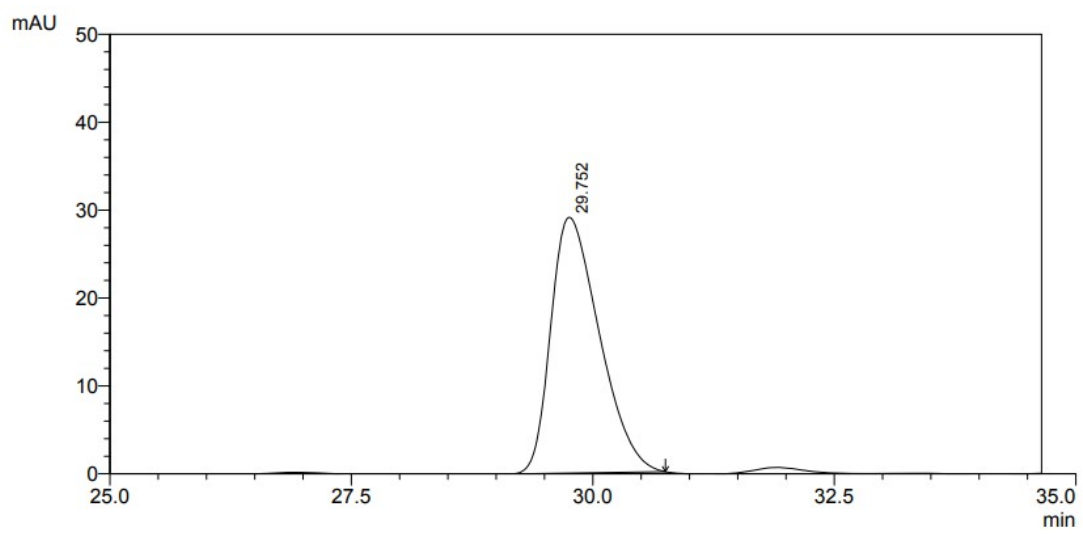

(*R*)-1-(4-bromophenyl)ethan-1-ol **11b**

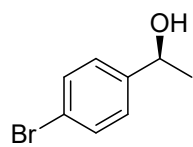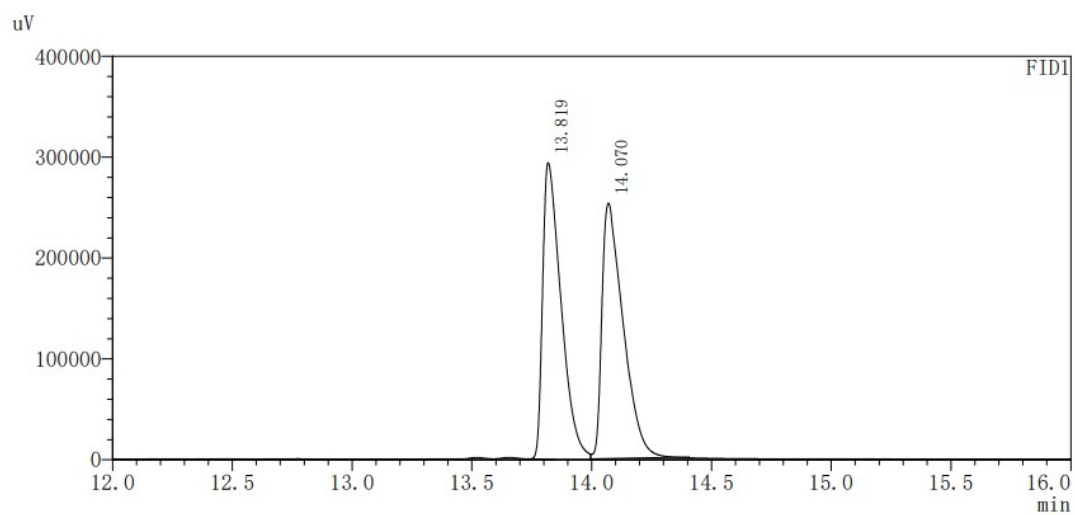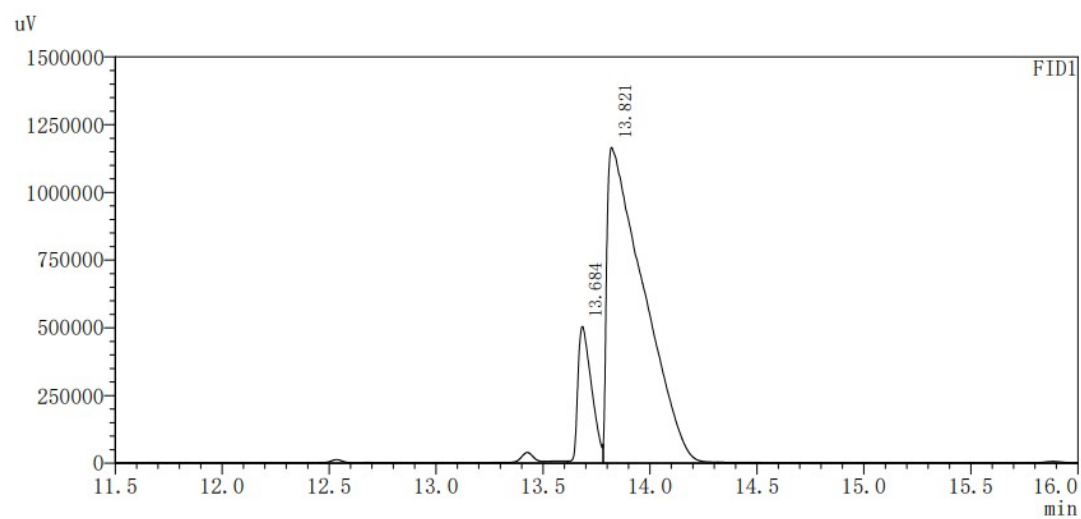

*(R)*-1-(2-bromo-4-fluorophenyl)ethanol **12b**

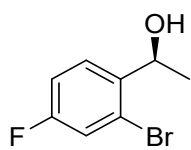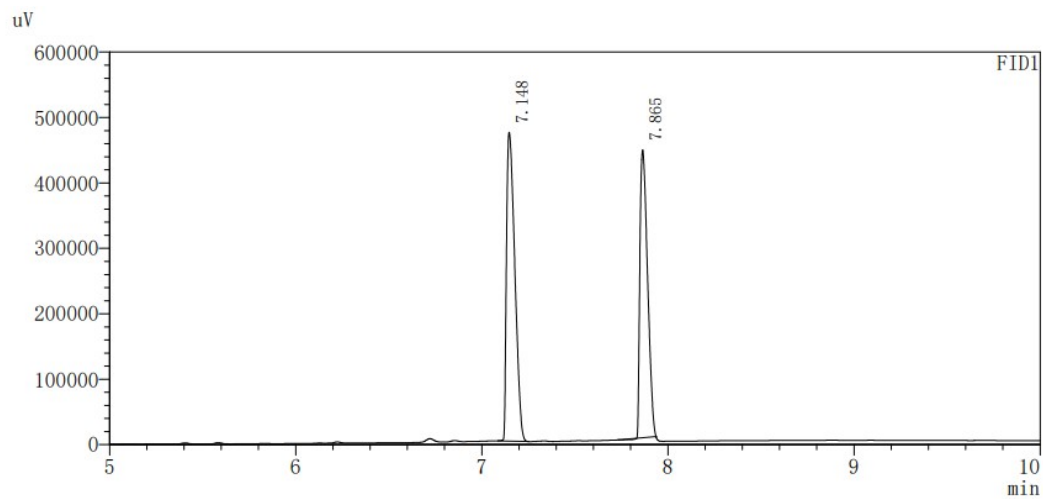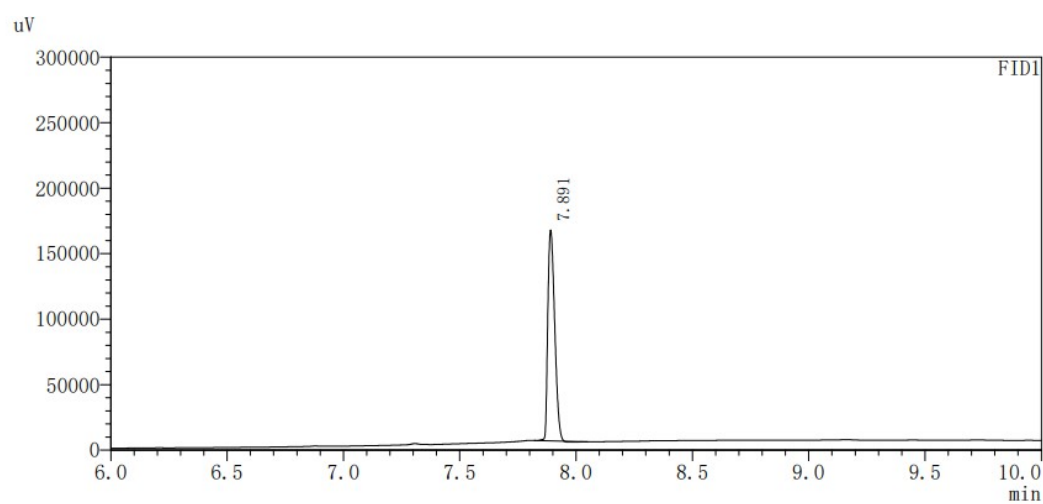

(S)-2-chloro-1-(2,4-difluorophenyl)ethanol **13b**

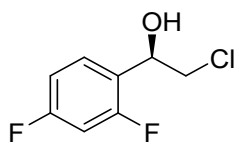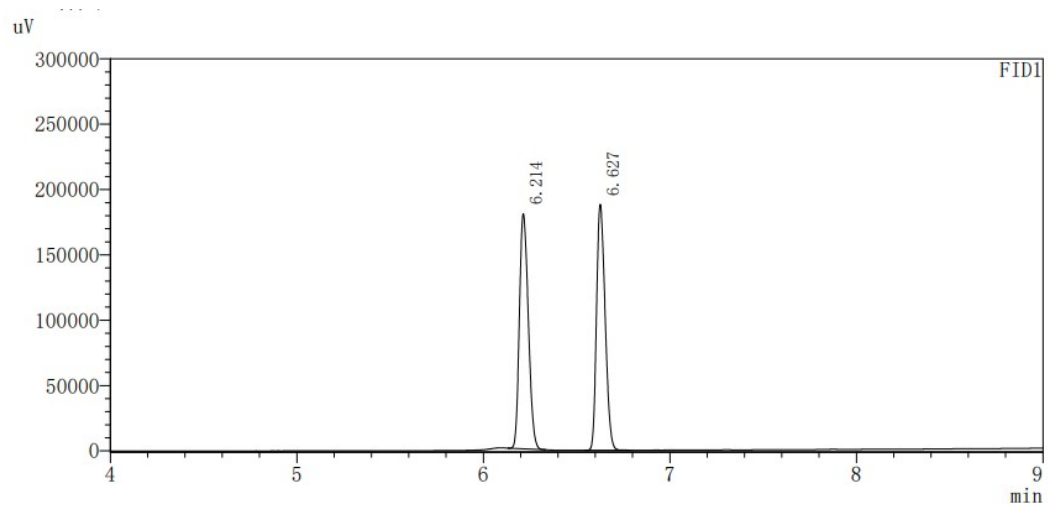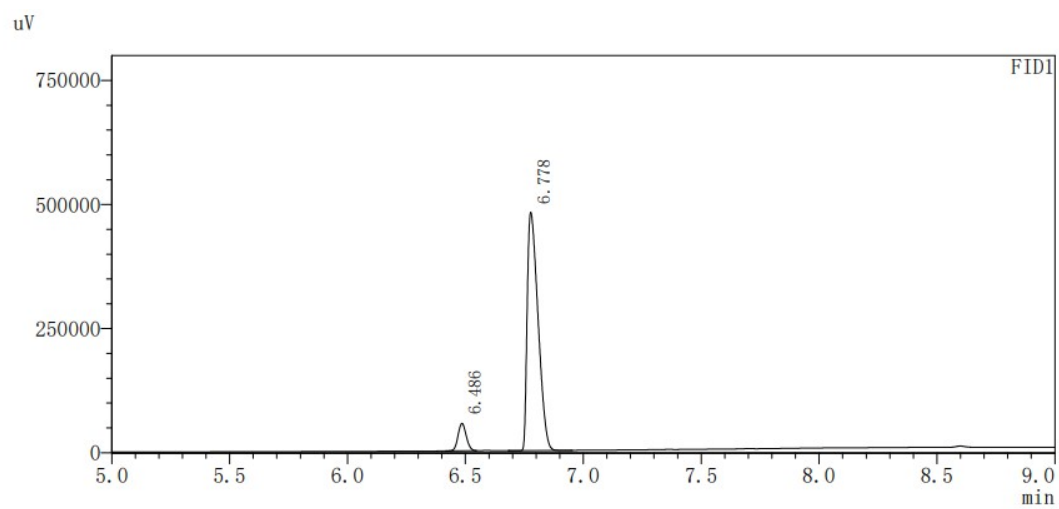



*(S)*-1-(3-chlorophenyl)ethan-1-ol **14b**

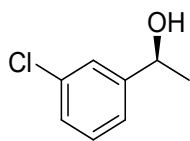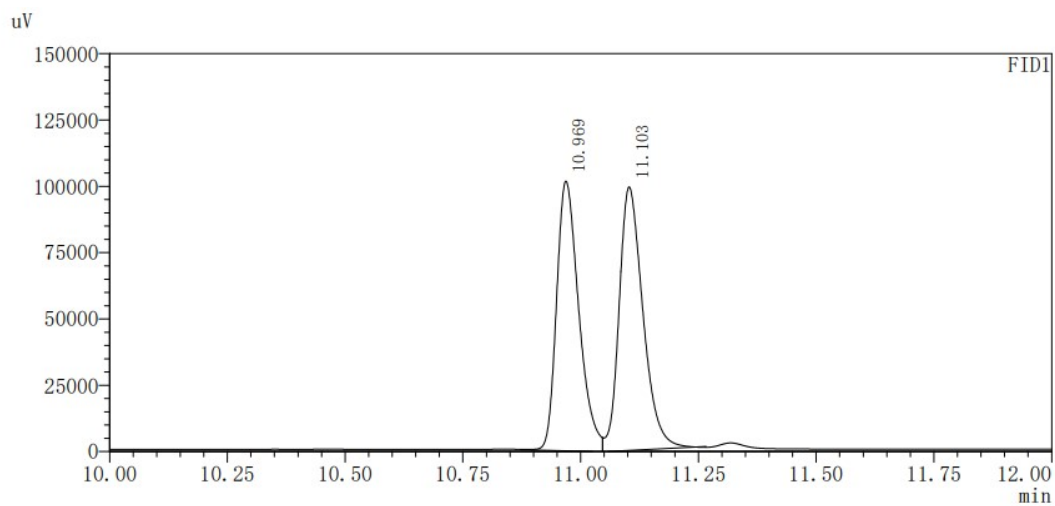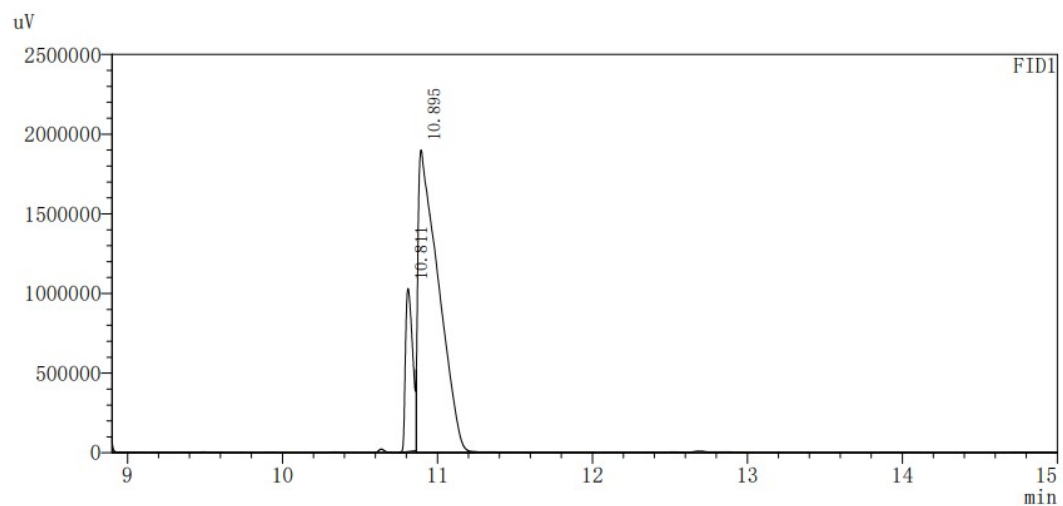

**(R)-1-(2-bromophenyl)ethan-1-ol **15b****

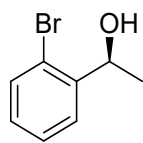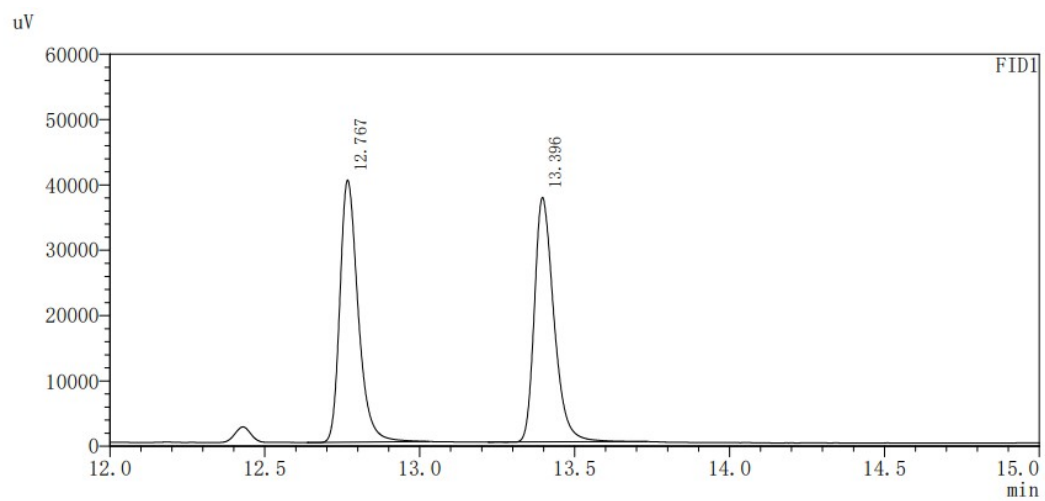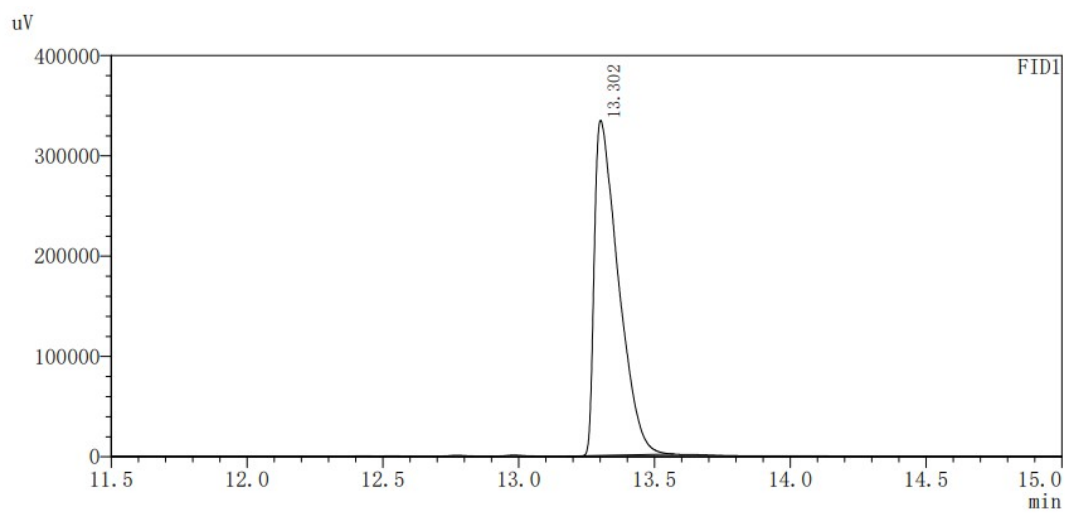

(S)-2-chloro-1-(3,4-difluorophenyl)-1-ethanol **16b**

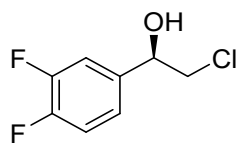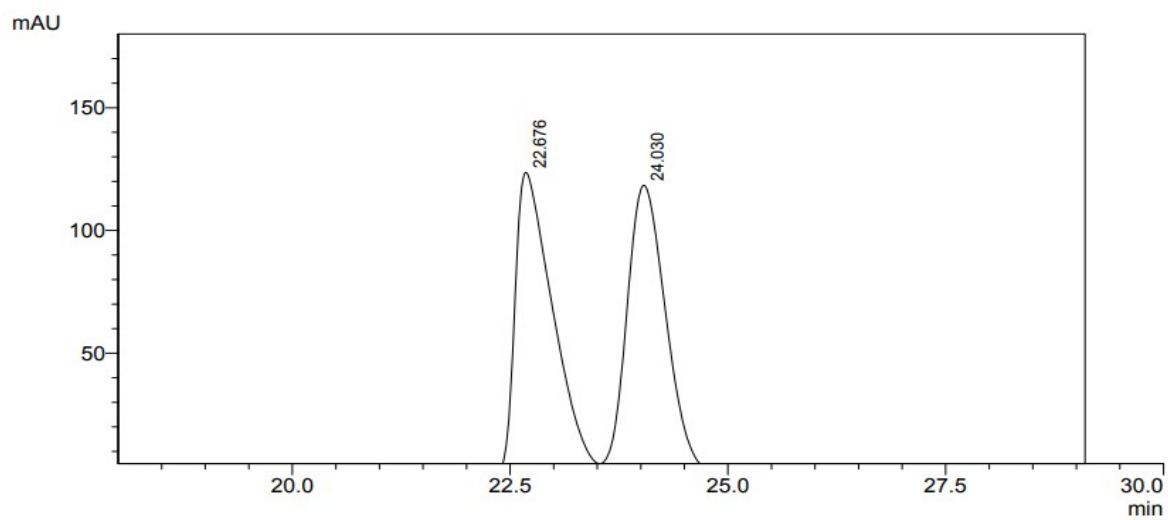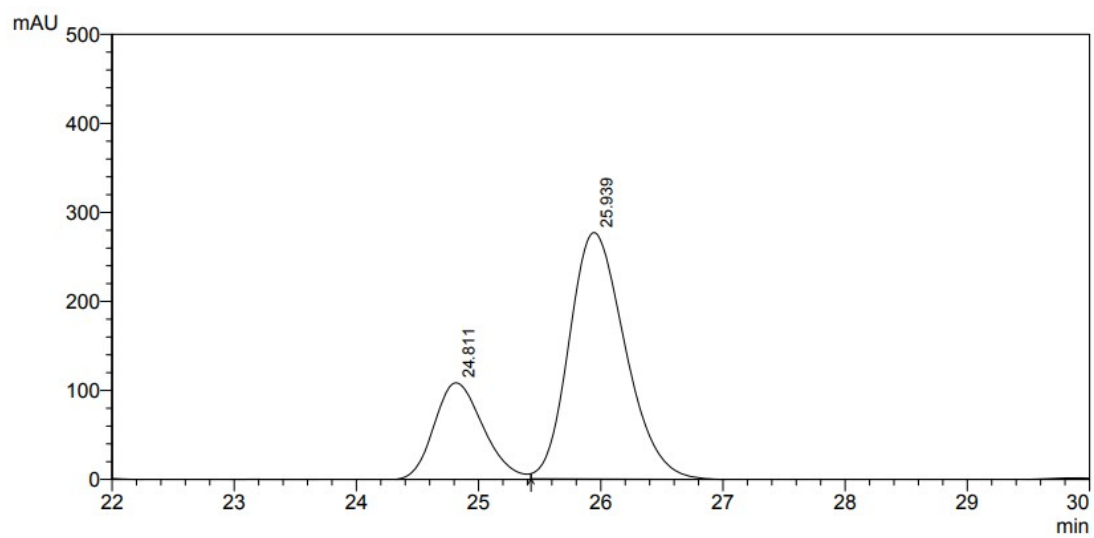

(S)-1-[4-(trifluoromethyl)phenyl]ethan-1-ol **17b**

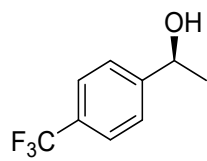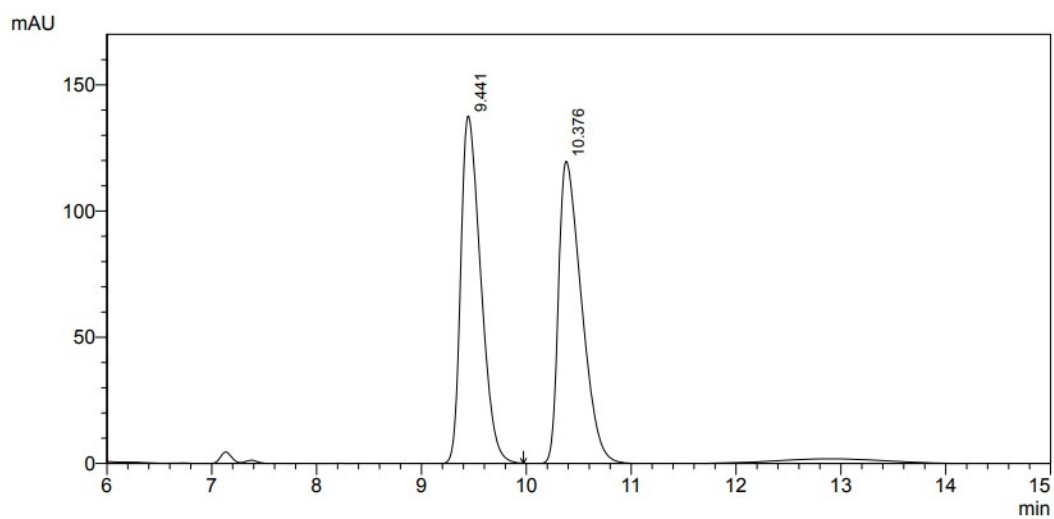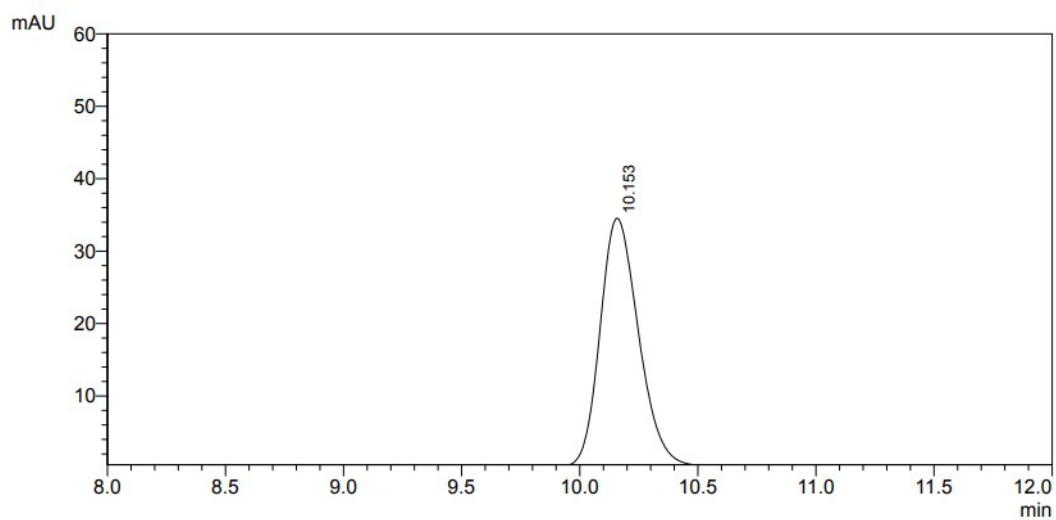

*(R)*-1-(3-bromophenyl)ethan-1-ol **18b**

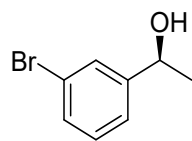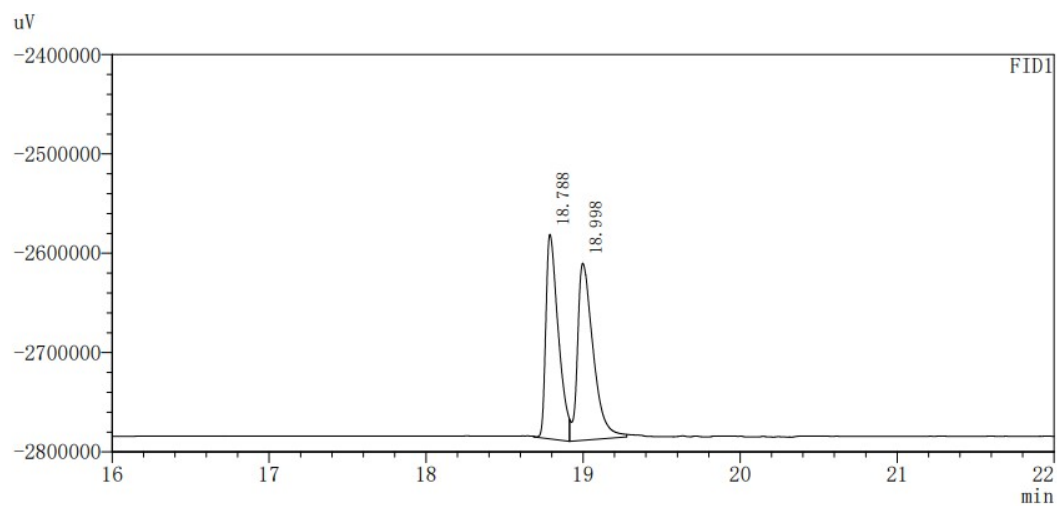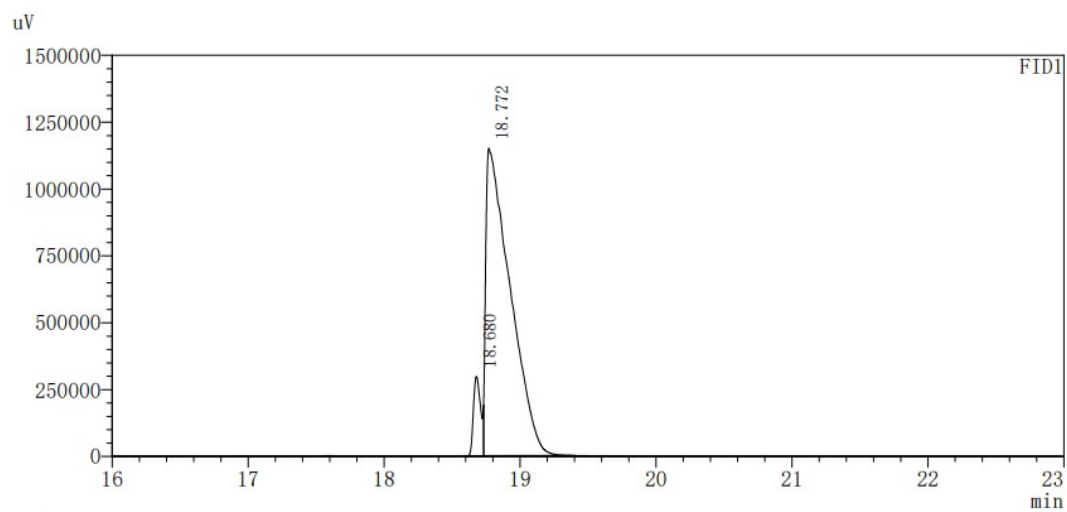

(S)-2-chloro-1-(4-Chlorophenyl)ethanol **19b**

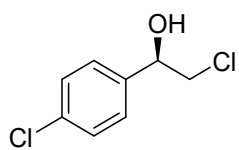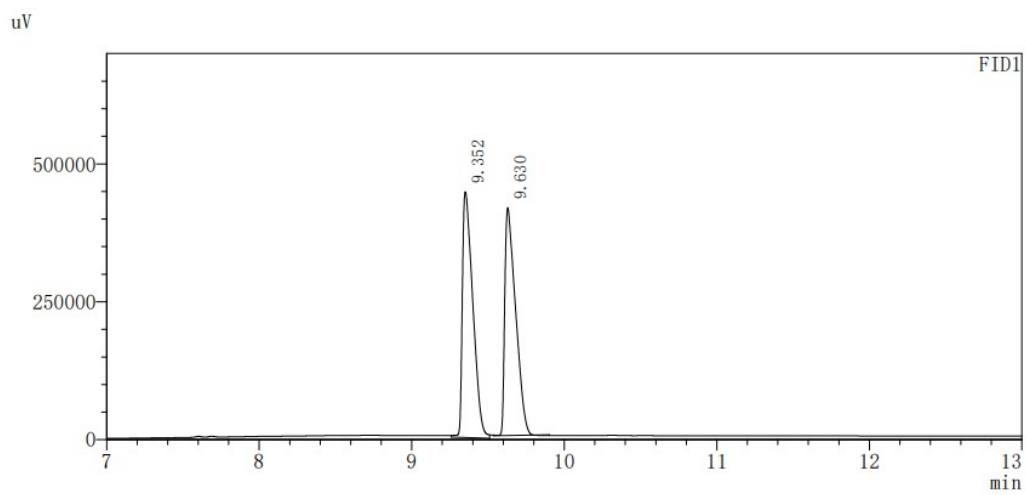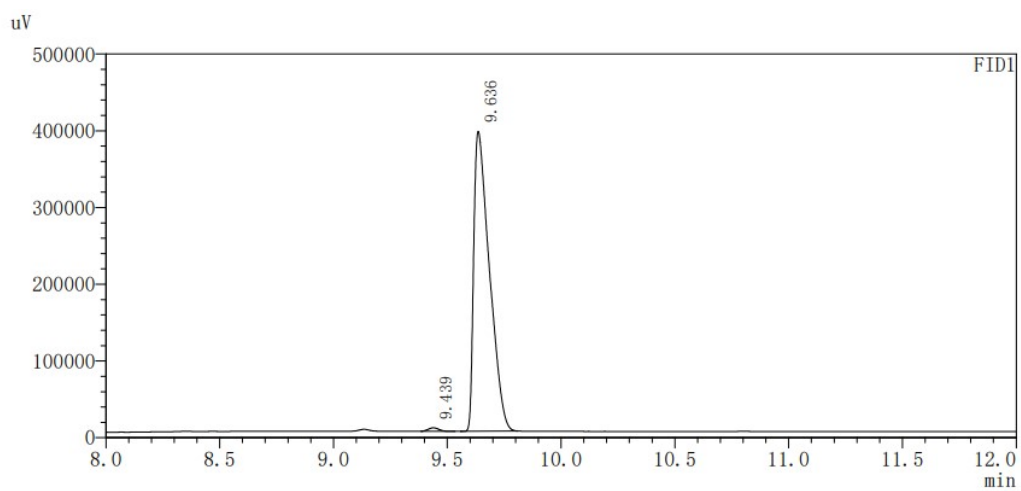

**(R)-1-(3-bromophenyl)propanol 20b**

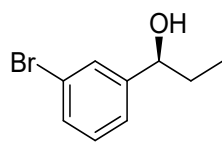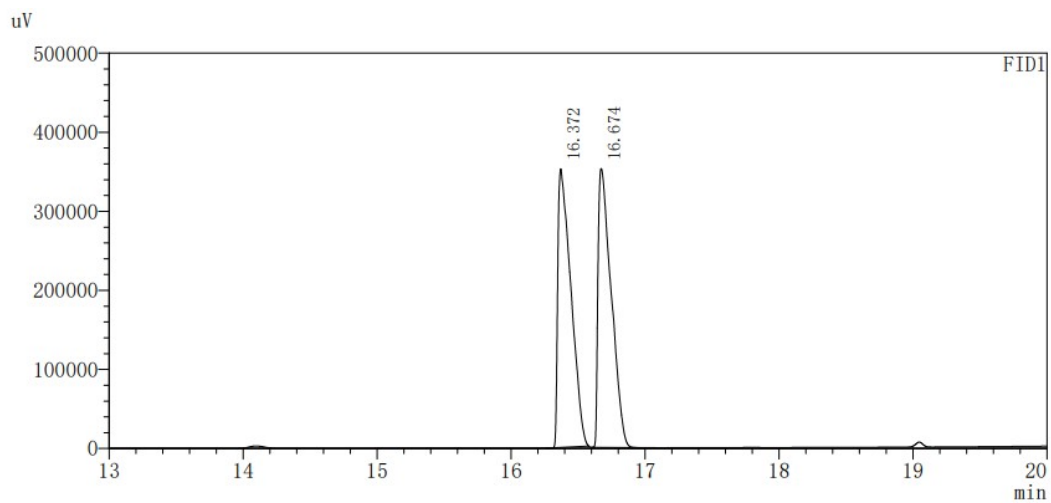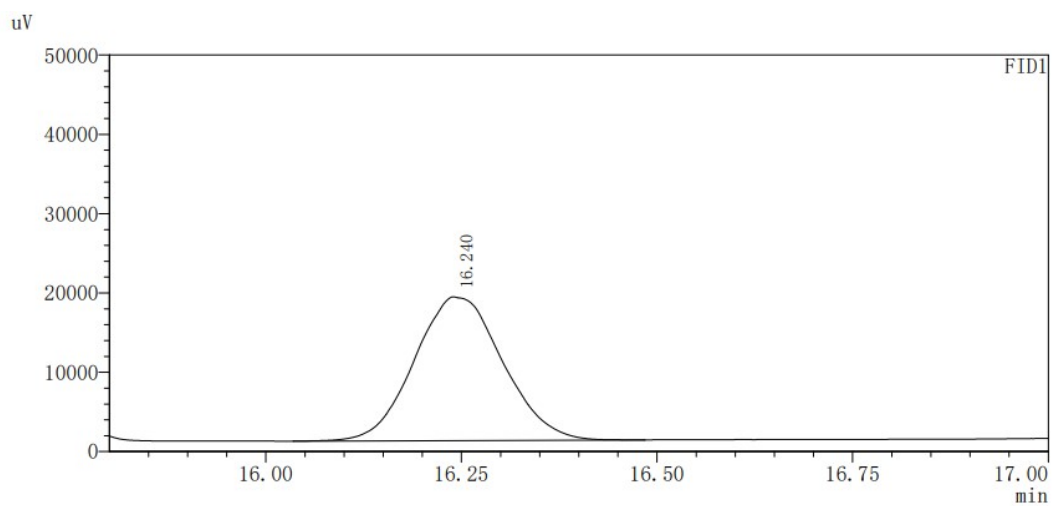

*(R)*-1-(3,4-dichlorophenyl)ethan-1-ol **21b**

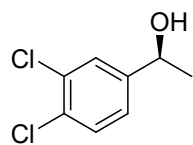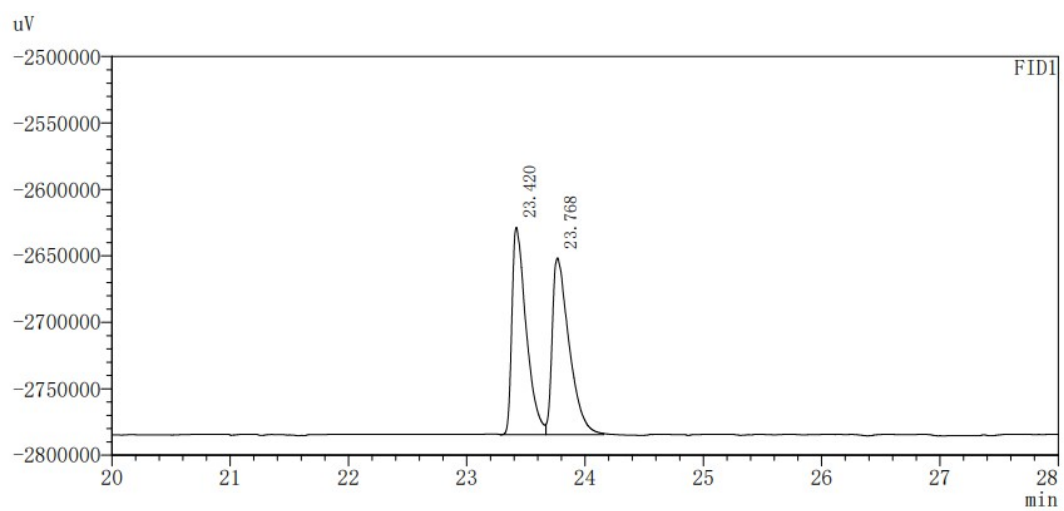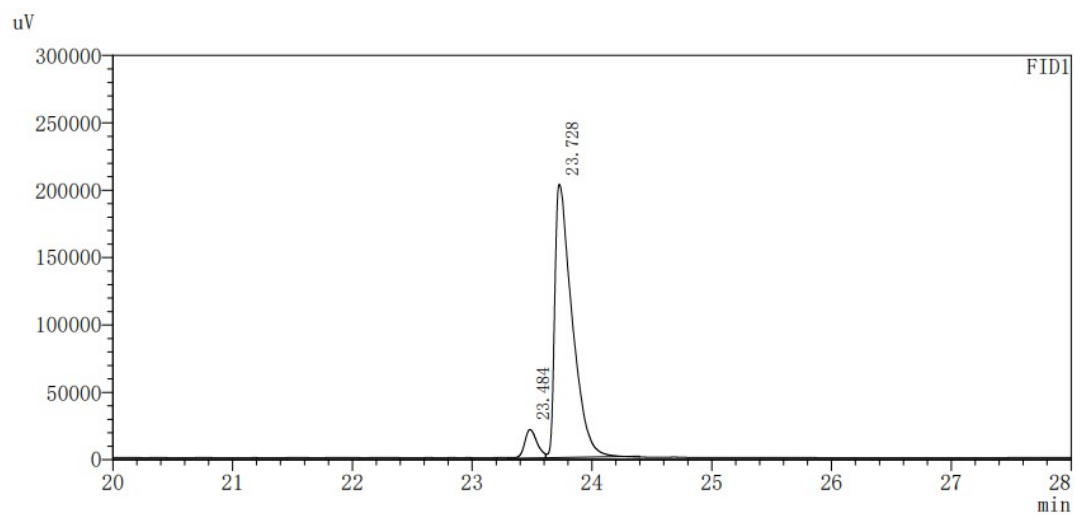



(S)-1-(4-bromophenyl)-2-chloroethanol **22b**

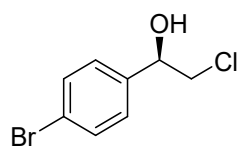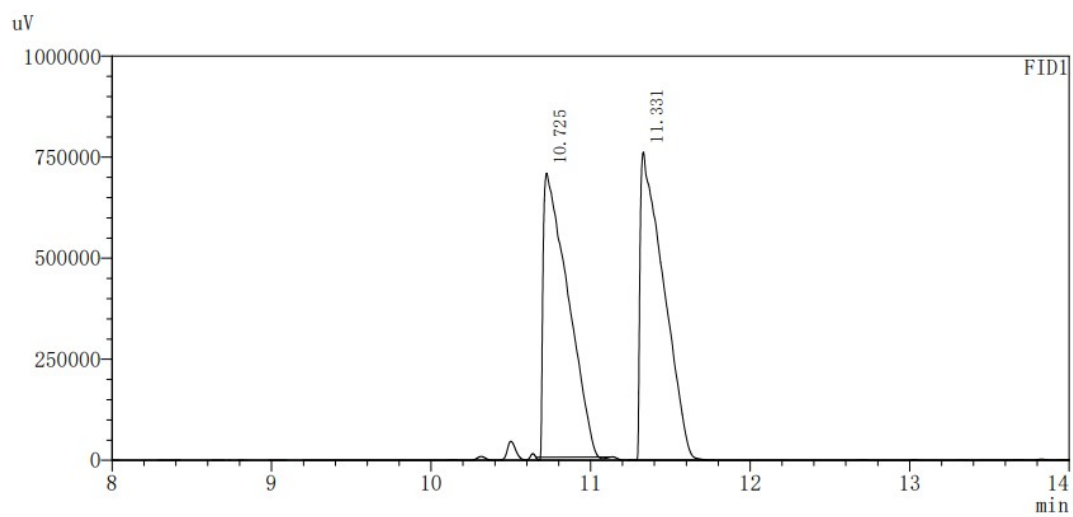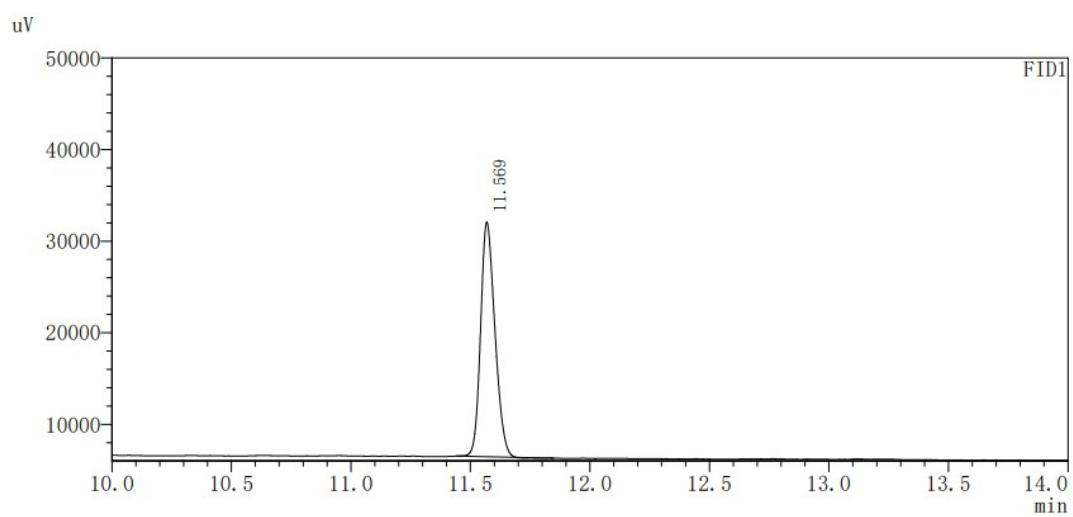

*(R)*-2-chloro-1-(2,4-dichlorophenyl)ethan-1-ol **23b**

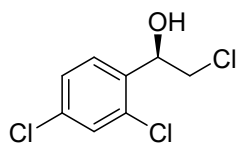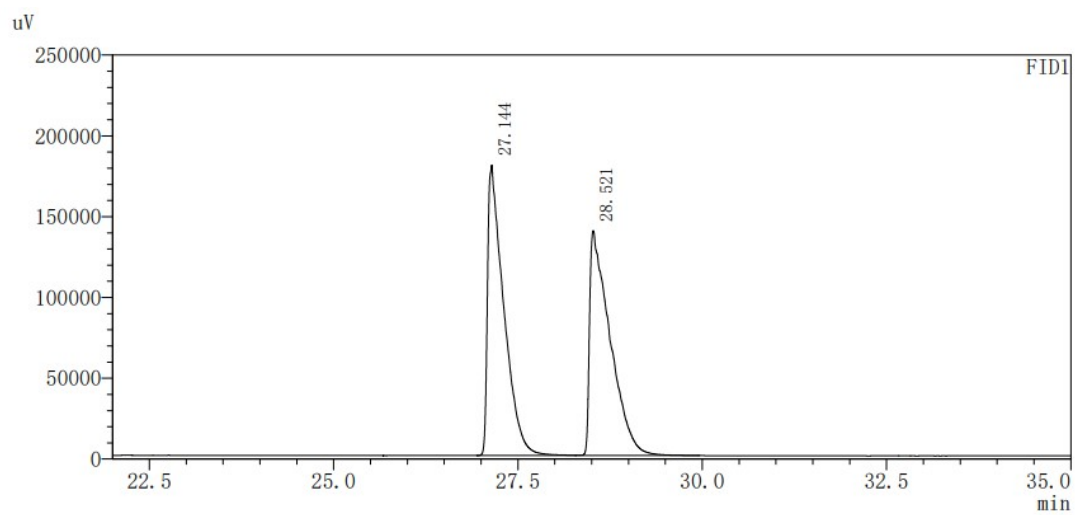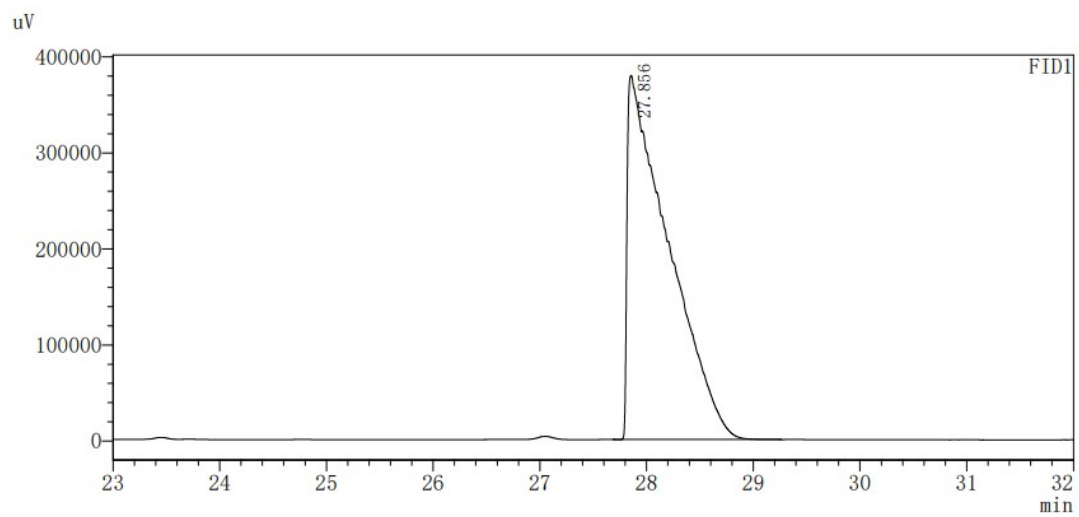

(S)-2-chloro-1-(3,4-dichlorophenyl)ethan-1-ol **24b**

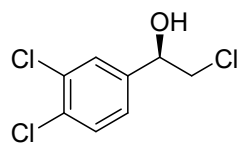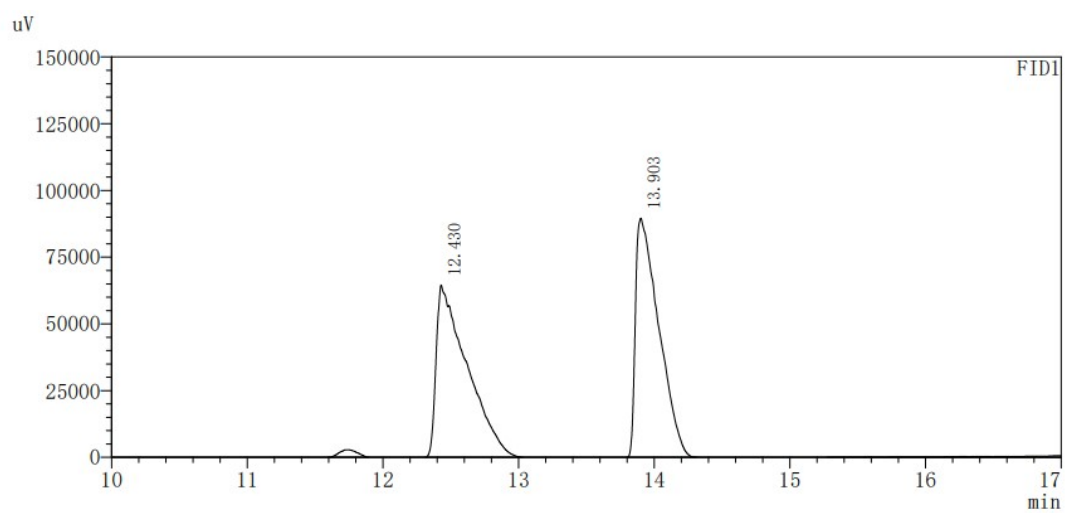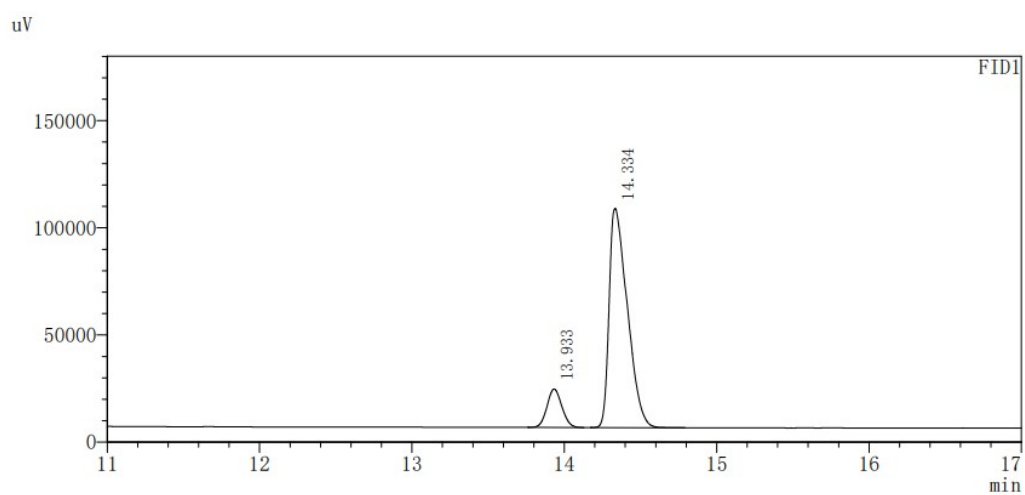

(S)-1-[3,5-bis(trifluoromethyl)phenyl]ethanol **25b**

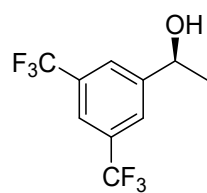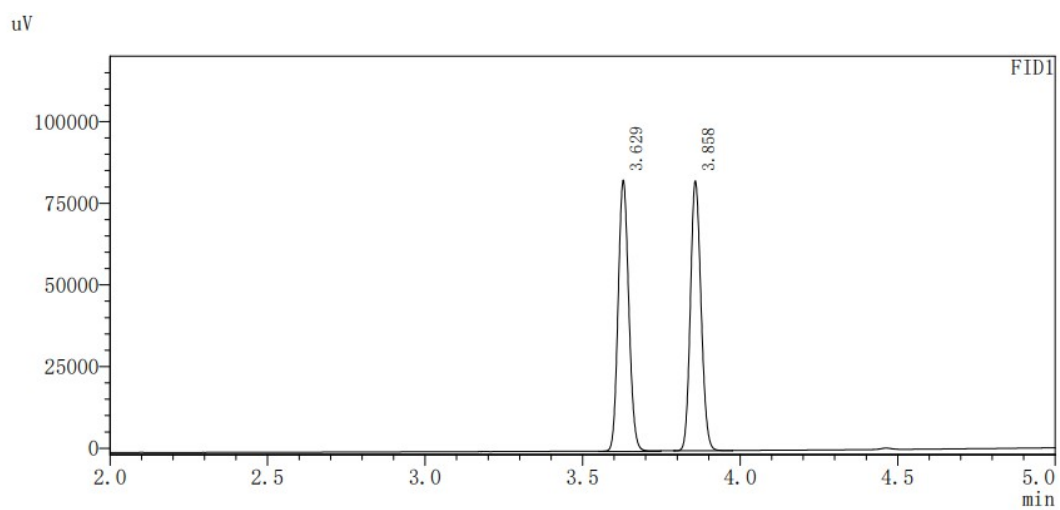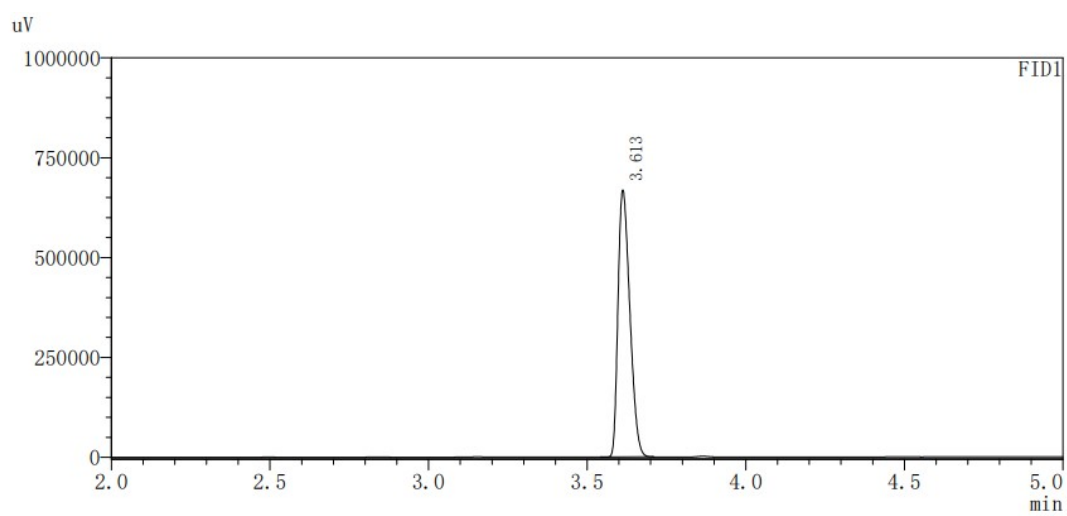

Supplement: d4gc00773e1.pdf [file d4gc00773e1.pdf]
